# Supplementary material
Source: Preprints.org preprint supplement (doi:10.20944/preprints201903.0280.v1)
Supplement: Supplementary file 1 [file supplementary]

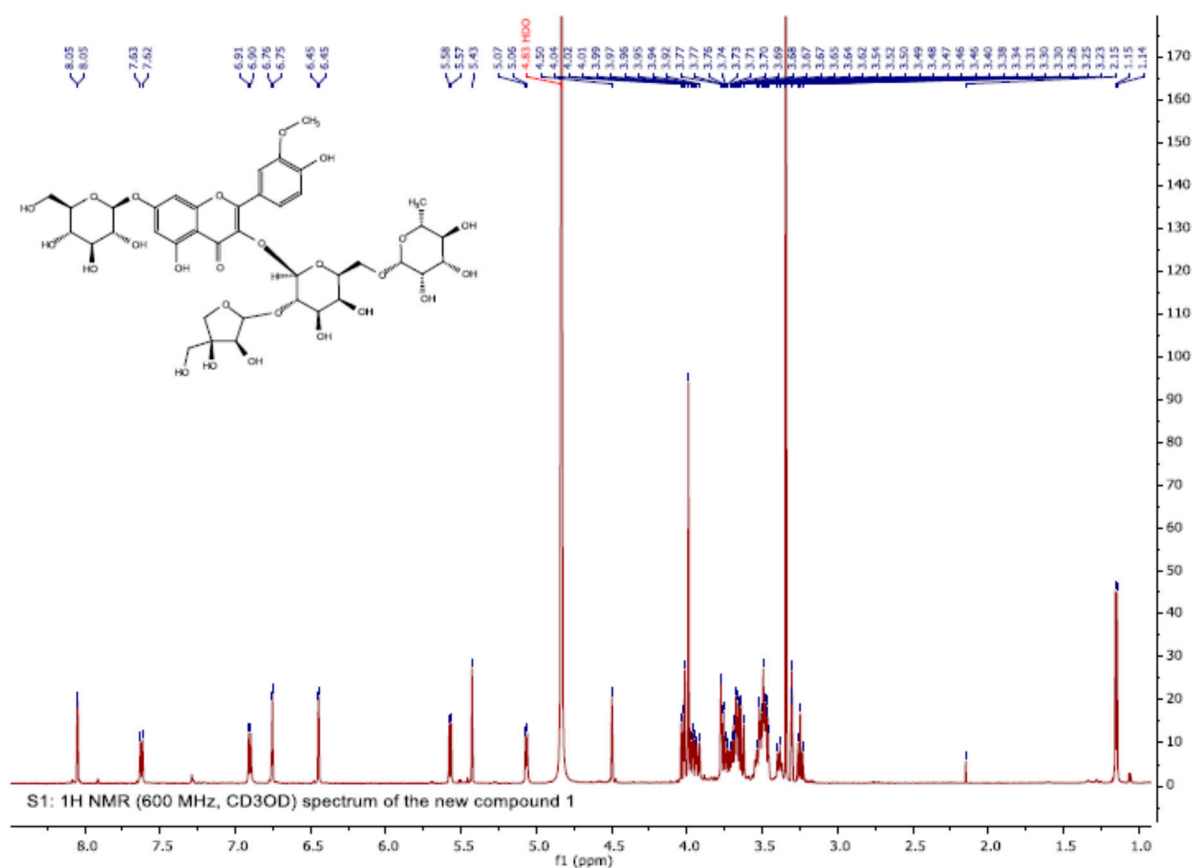

Figure S1:  $^1\text{H}$  NMR (600 MHz,  $\text{CD}_3\text{OD}$ ) spectrum of compound 1

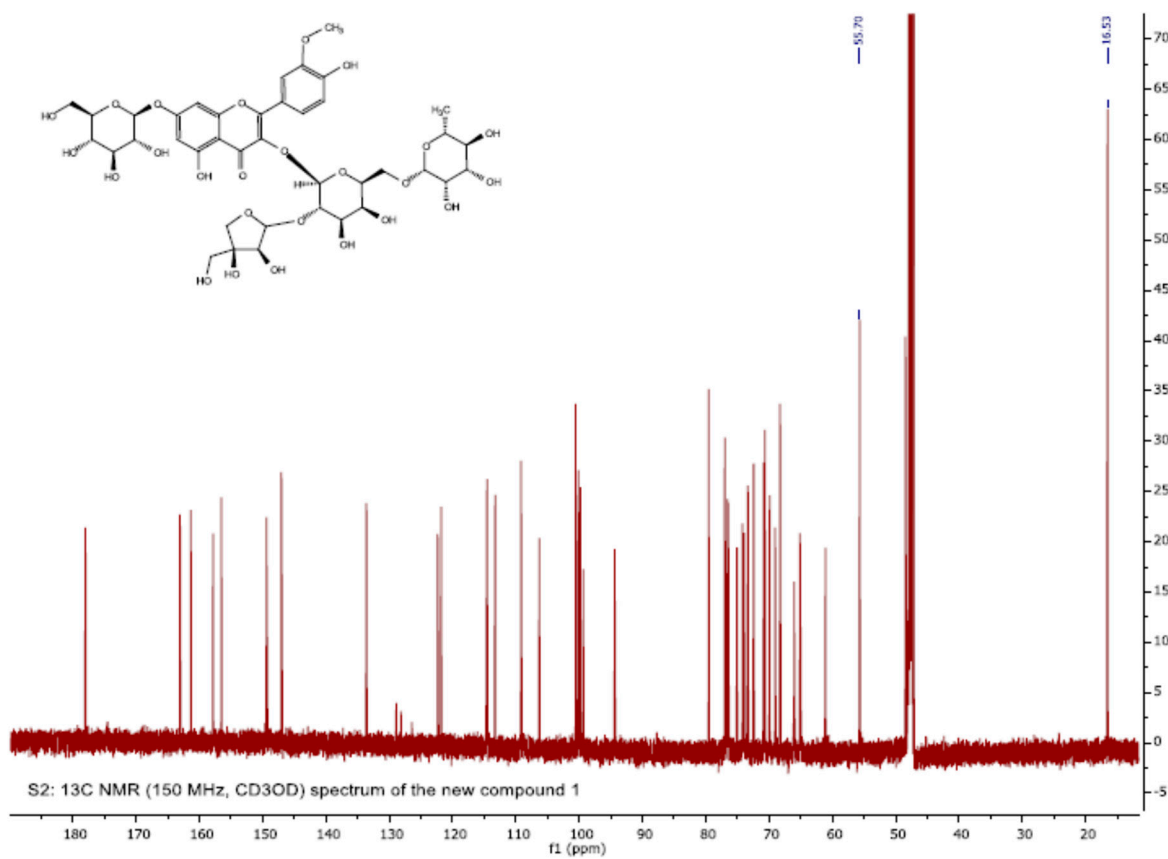

Figure S2:  $^{13}\text{C}$  NMR (150 MHz,  $\text{CD}_3\text{OD}$ ) spectrum of compound 1

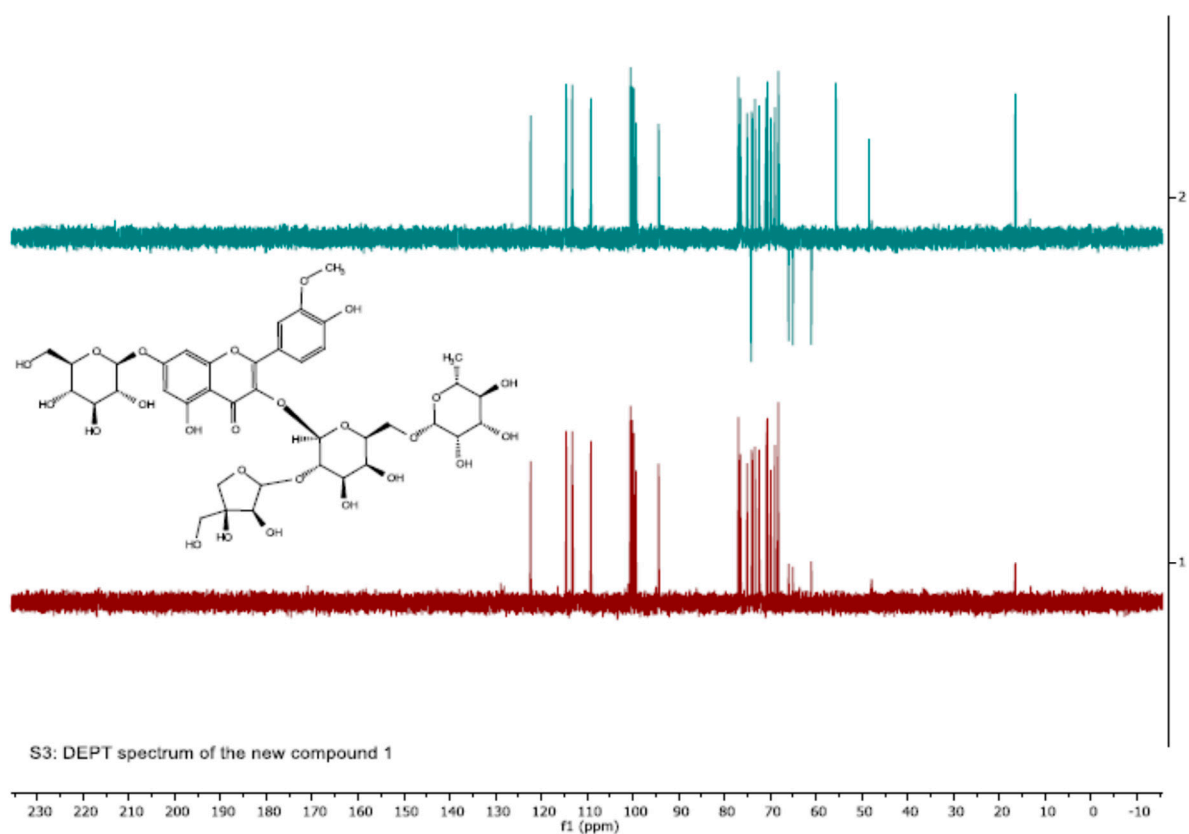

Figure S3: DEPT spectrum of compound 1

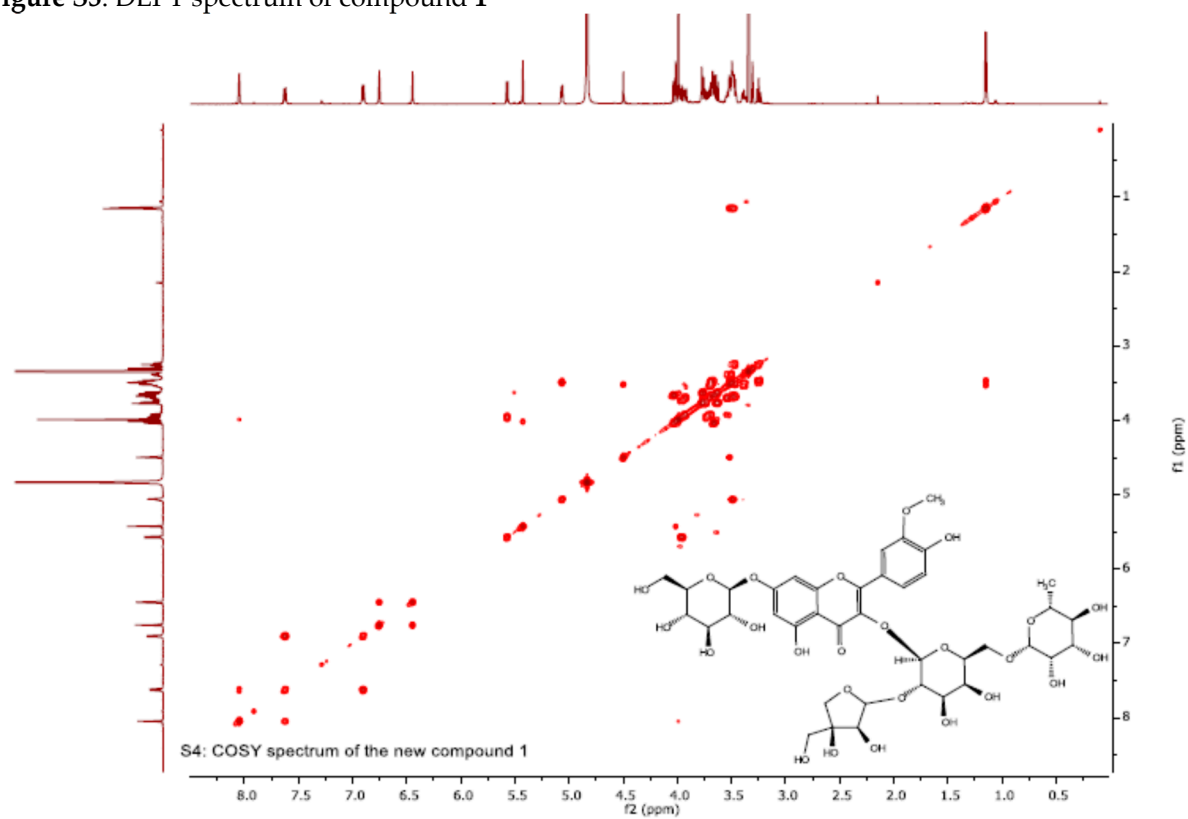

Figure S4: COSY spectrum of compound 1

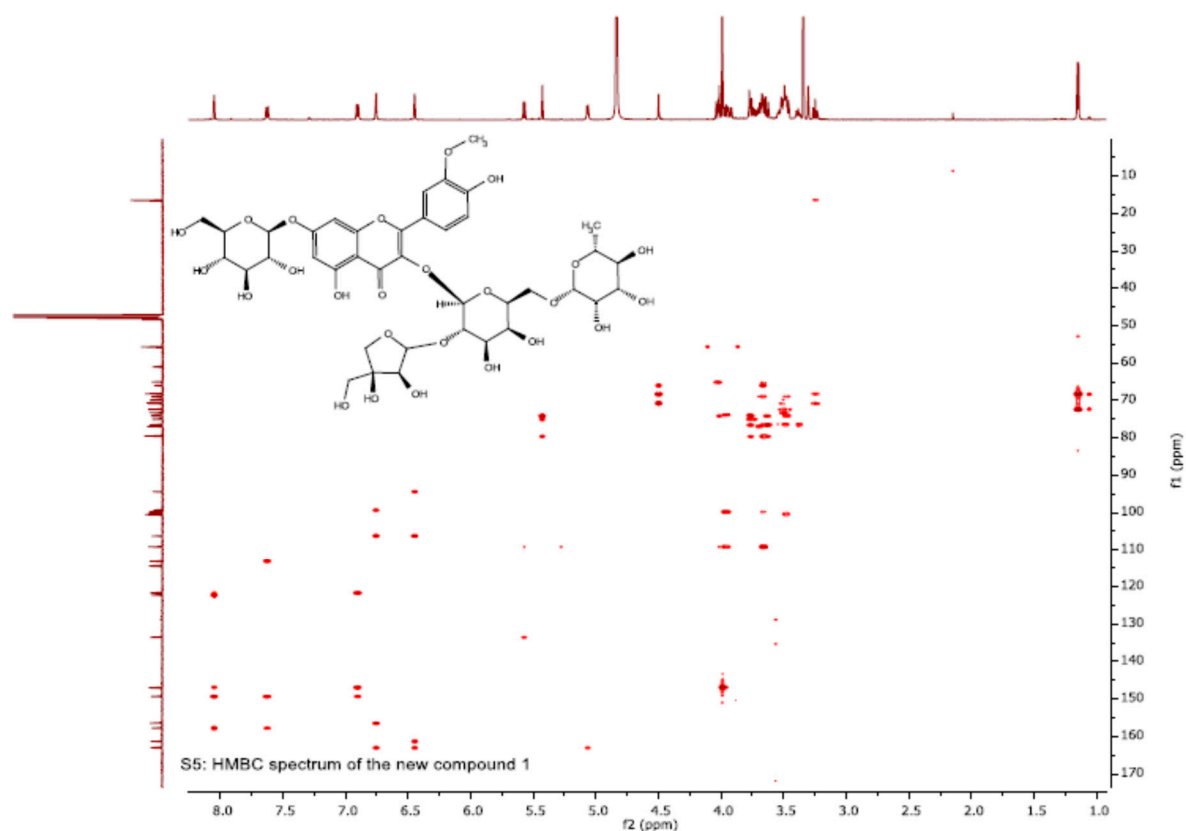

Figure S5: HMBC spectrum of compound 1

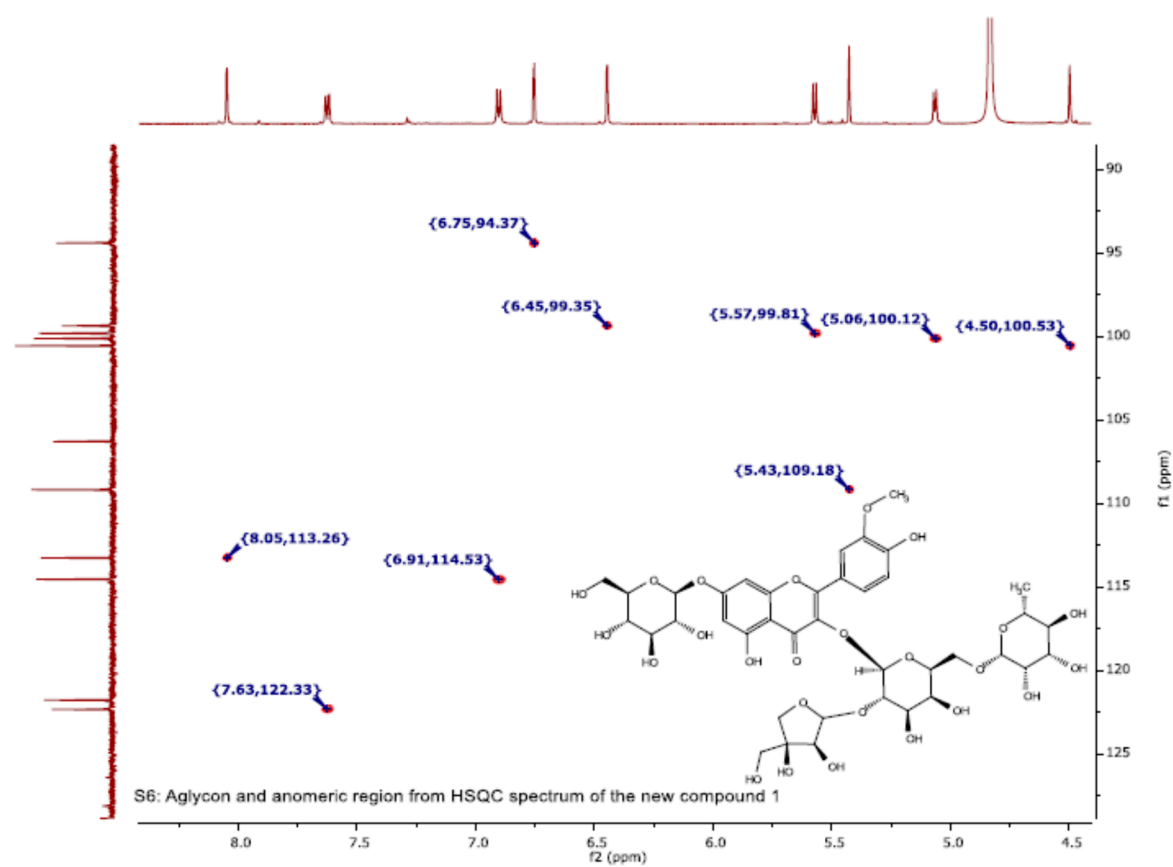

Figure S6: HSQC spectrum of compound 1 (aglycon and anomeric region)

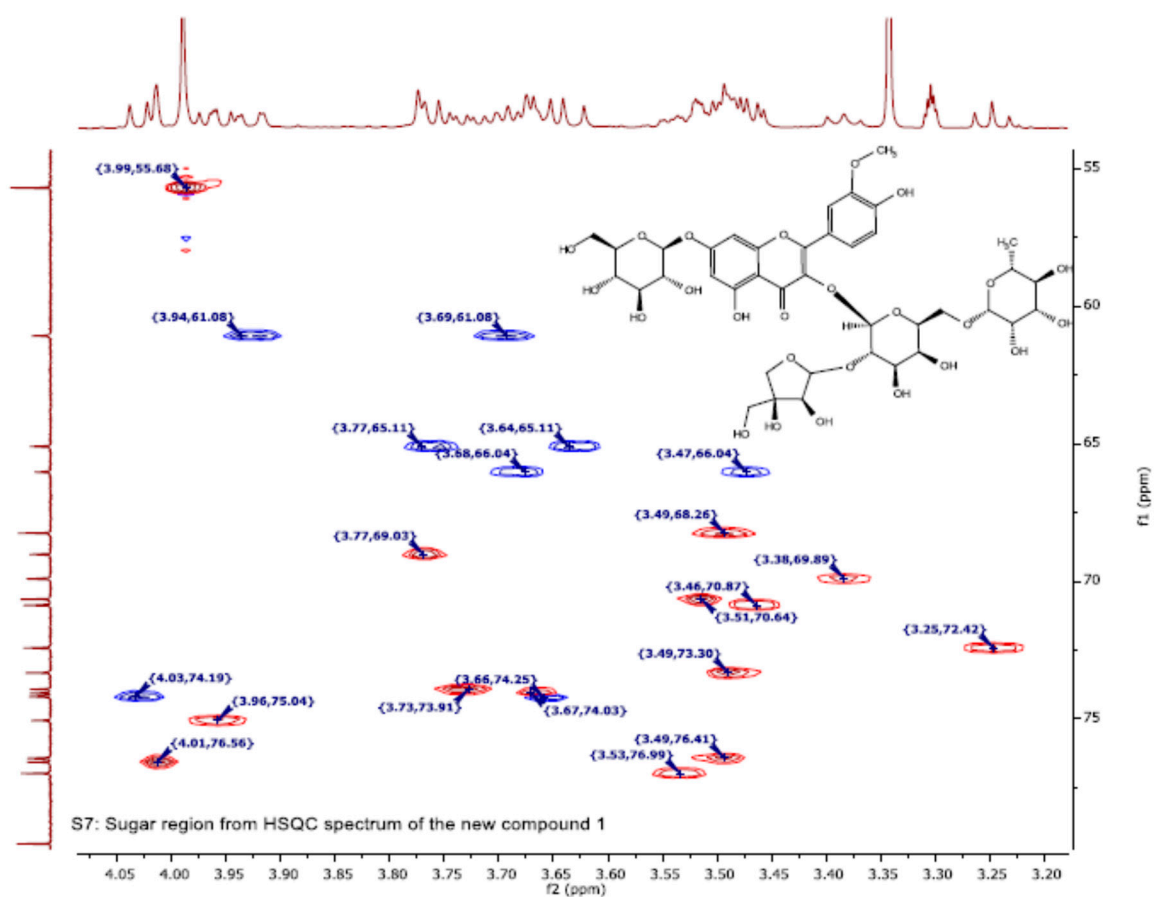

Figure S7: HSQC spectrum of compound 1 (sugar region)

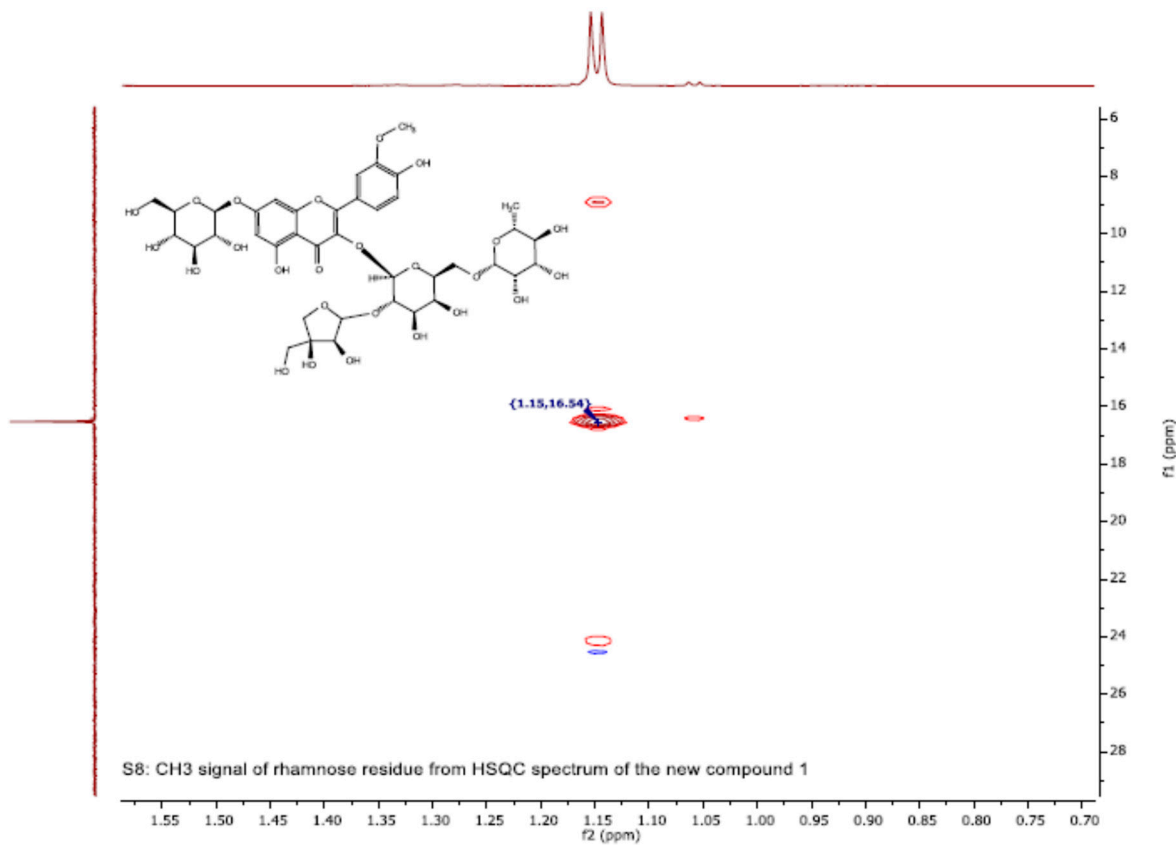

Figure S8: HSQC spectrum of compound 1 (methyl signal of rhamnose moiety)



Histo\_03\_161219 #2112-2173 RT: 4.90-5.0  
T: FTMS - p ESI Full ms [100.00-1500.00]

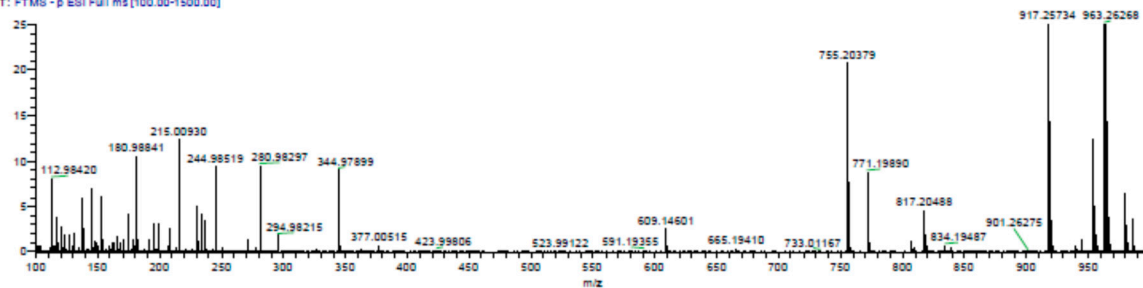

Histo\_03\_161219 #2122-2206 RT: 4.91-5.09 AV: 2 NL: 4.15EE  
T: Average spectrum MS2 917.26 (2122-2206)

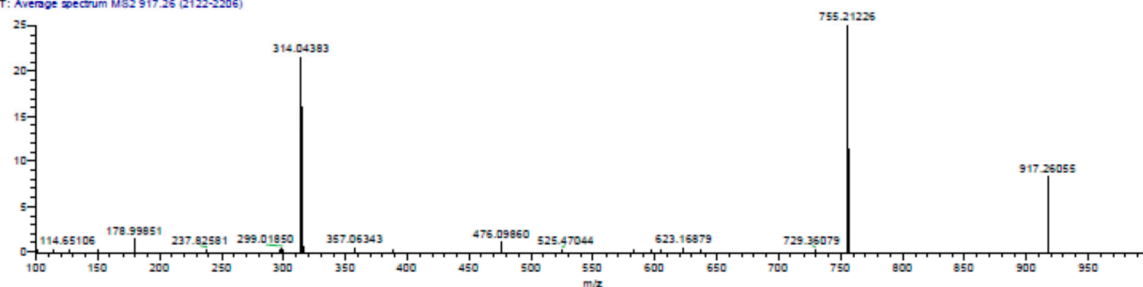

S9: HR-ESI-MS (ESI negative mode) spectrum of the new compound 1

Up: full-scan

Down: MS2 of 917.25734 m/z

Figure S9: HR-ESI-MS (negative mode) of compound 1

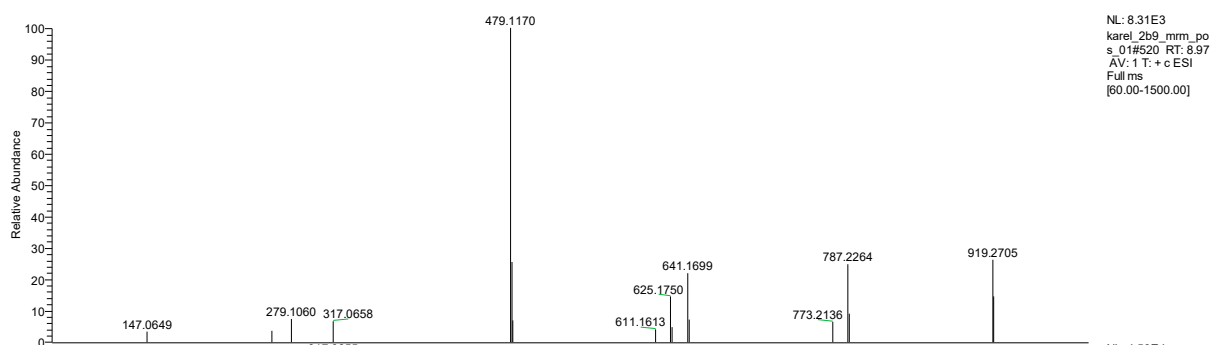

NL: 8.31E3  
karel\_2b9\_mm\_po  
s\_01#520 RT: 8.97  
AV: 1 T: + c ESI  
Full ms  
[60.00-1500.00]

Figure S10: HR-ESI-MS (positive mode) of compound 1

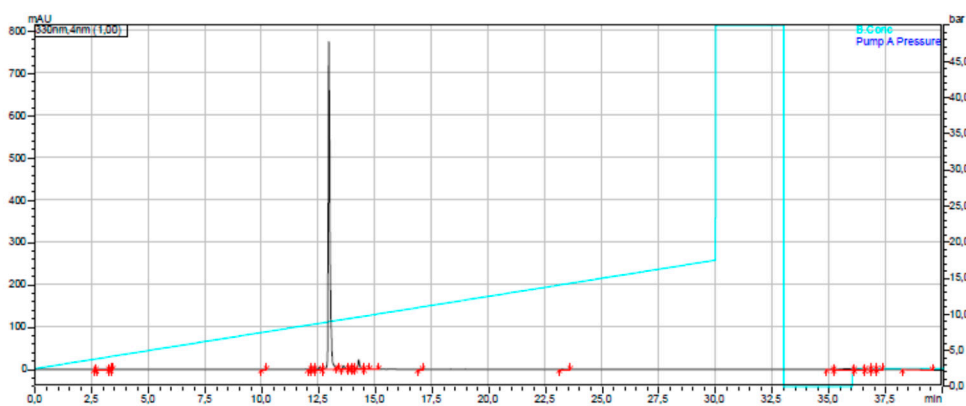

S10: HPLC of compound 1

Gradient 5 -> 35% Phase A (CH<sub>3</sub>CN); Phase B (H<sub>2</sub>O + 0.02% HCOOH) Column: Kinetex® PFP 100 A, 250 x 4.6 mm I.D., 5 µm (Phenomenex, USA).

Flow rate: 1 ml/min

Figure S11: HPLC chromatogram of compound 1

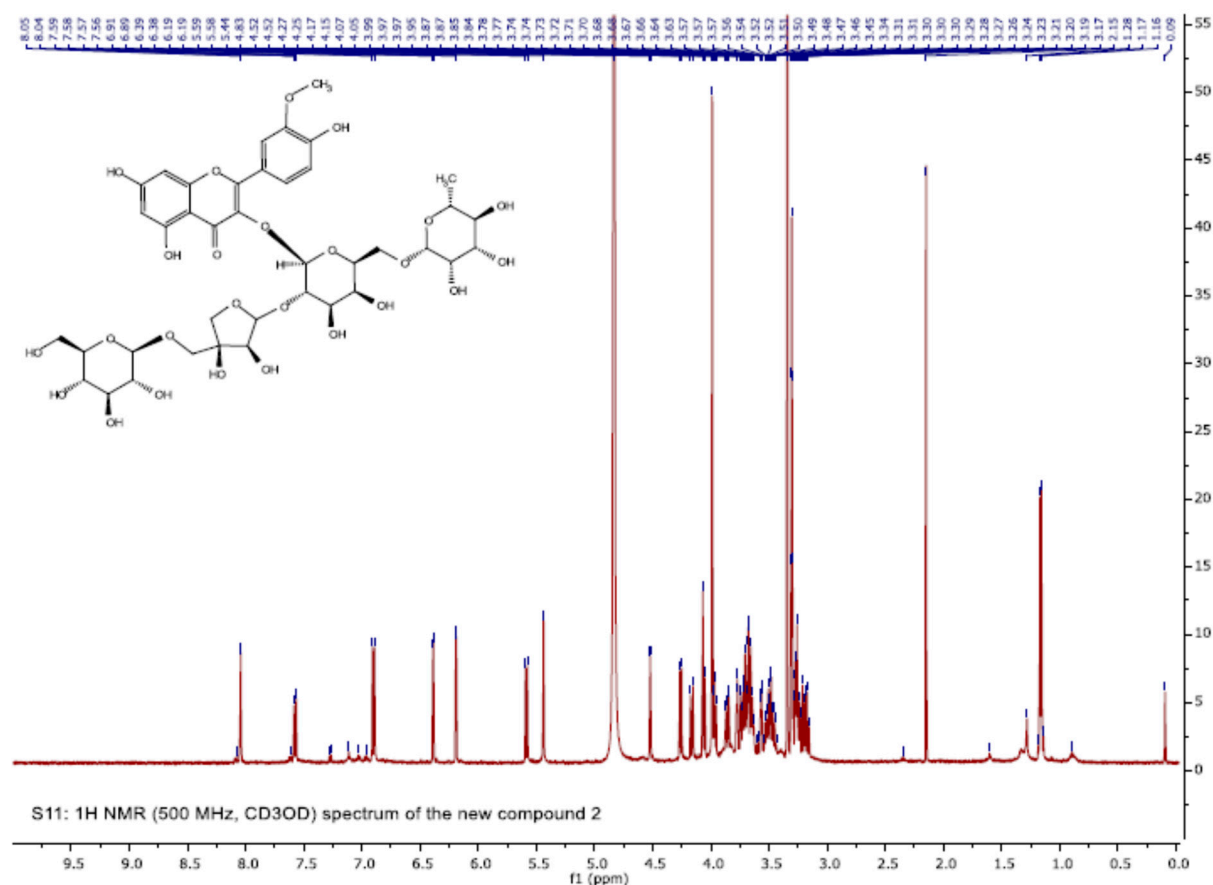

Figure S12: <sup>1</sup>H NMR (600 MHz, CD<sub>3</sub>OD) spectrum of compound 2

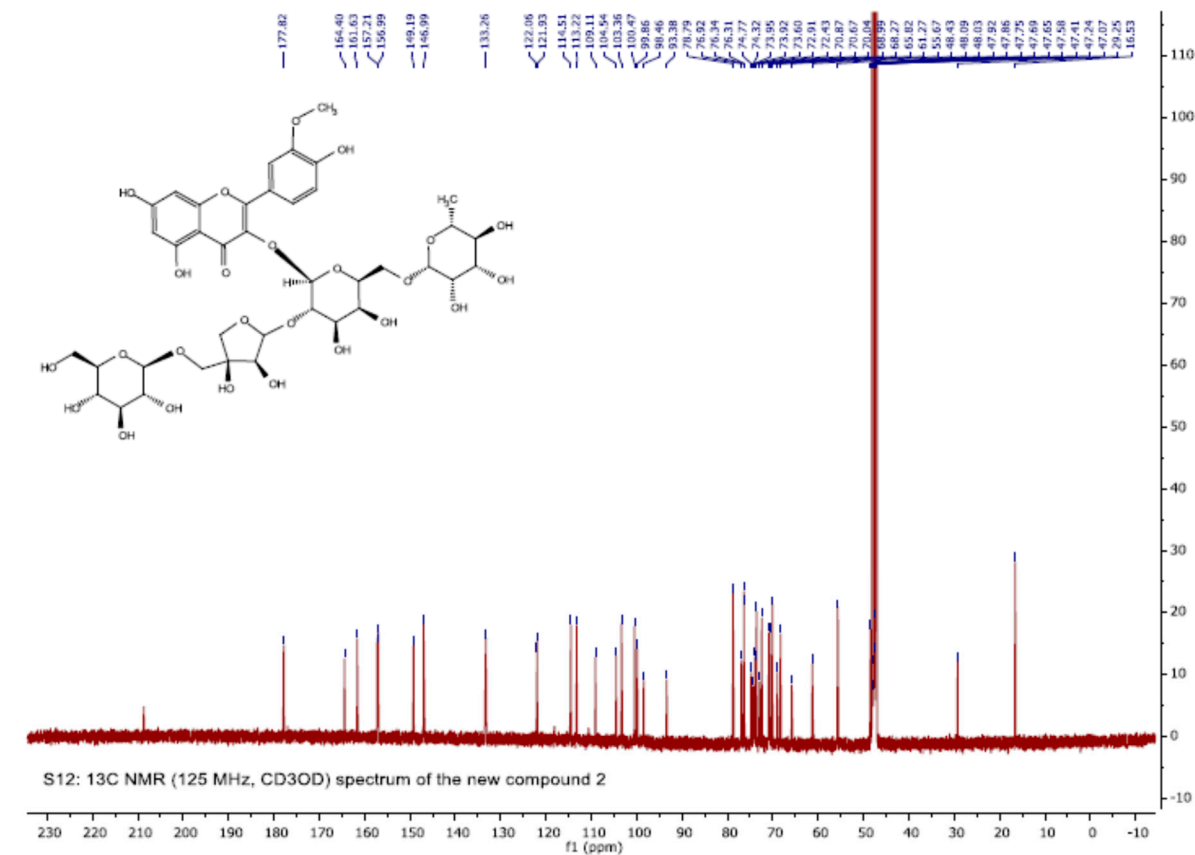

Figure S13: <sup>13</sup>C NMR (125 MHz, CD<sub>3</sub>OD) spectrum of compound 2

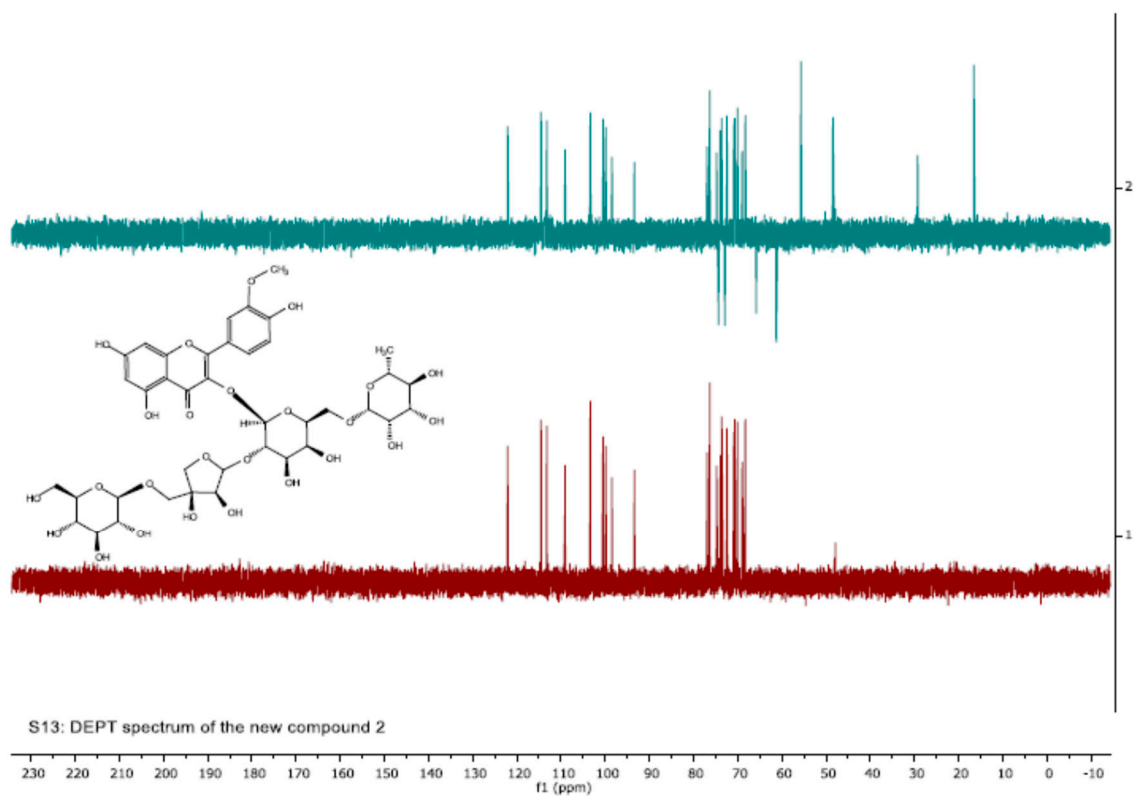

Figure S14: DEPT spectrum of compound 2

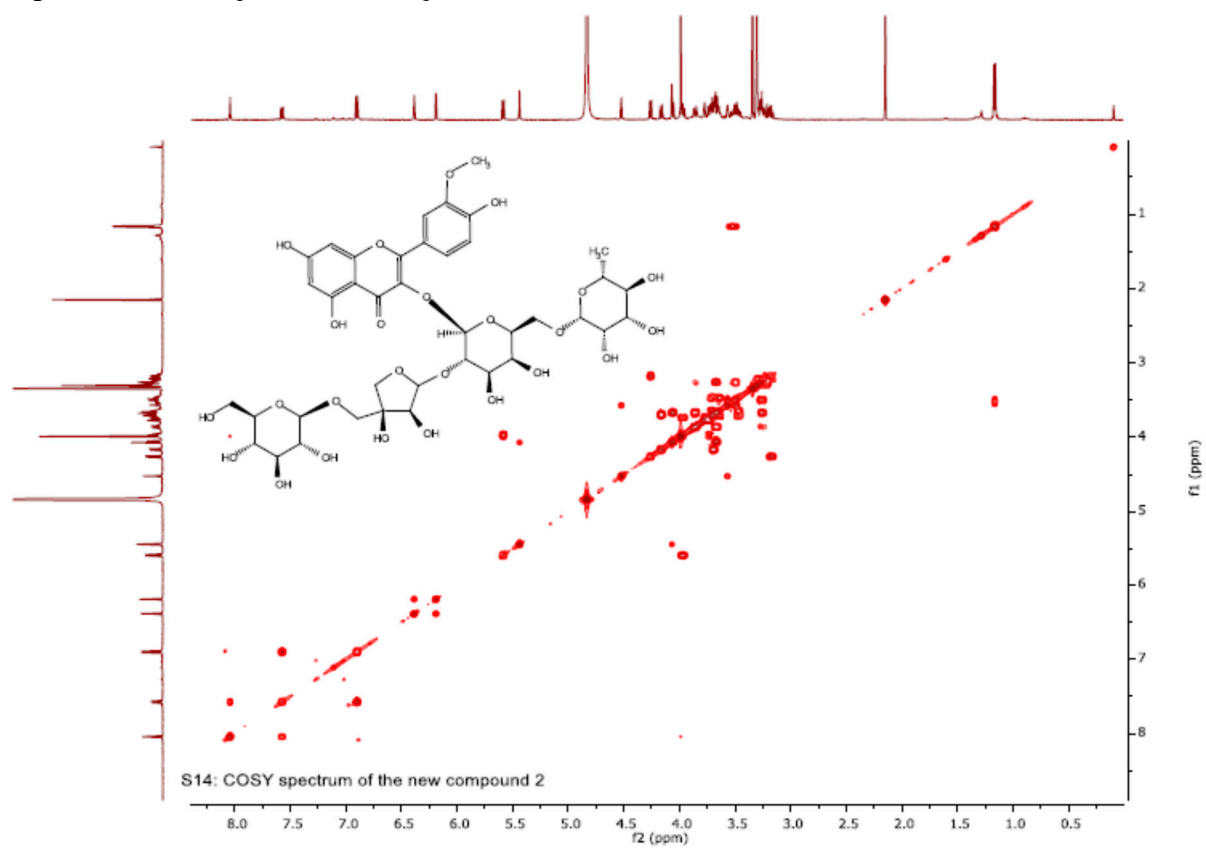

Figure S15: COSY spectrum of compound 2

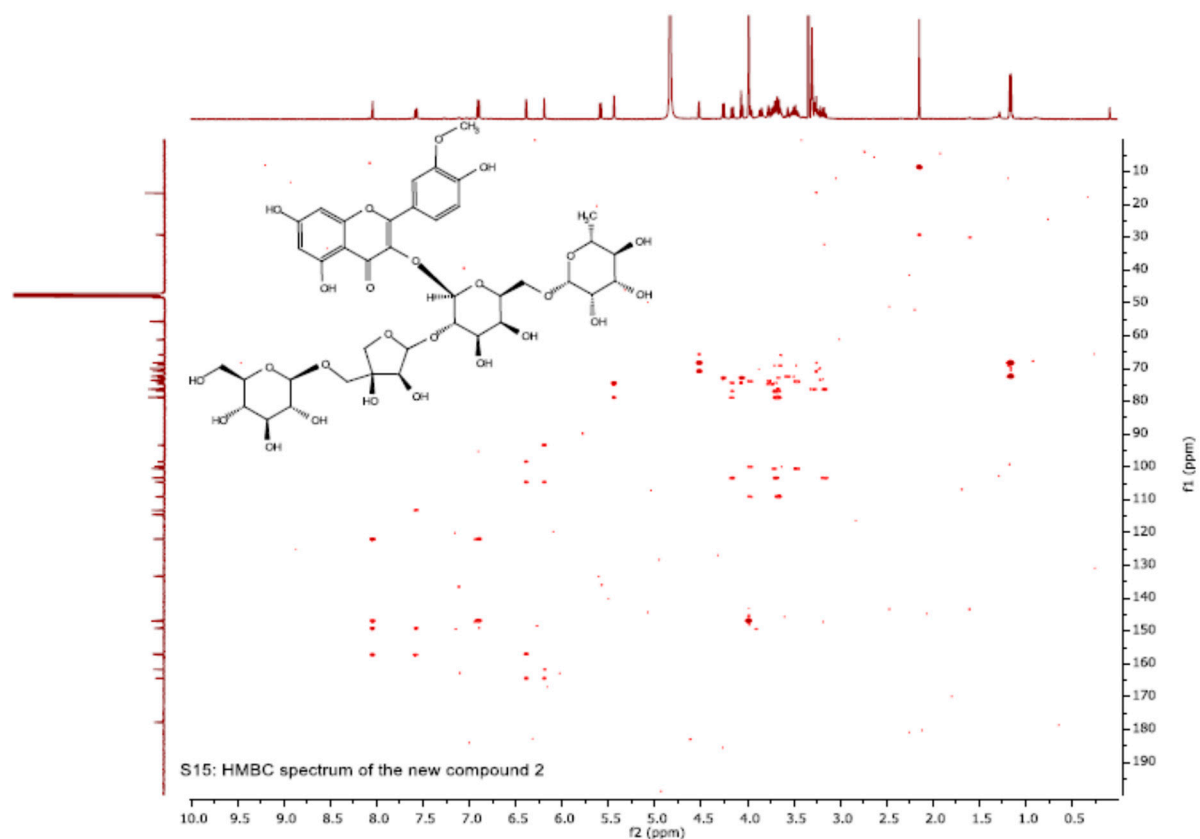

Figure S16: HMBC spectrum of compound 2

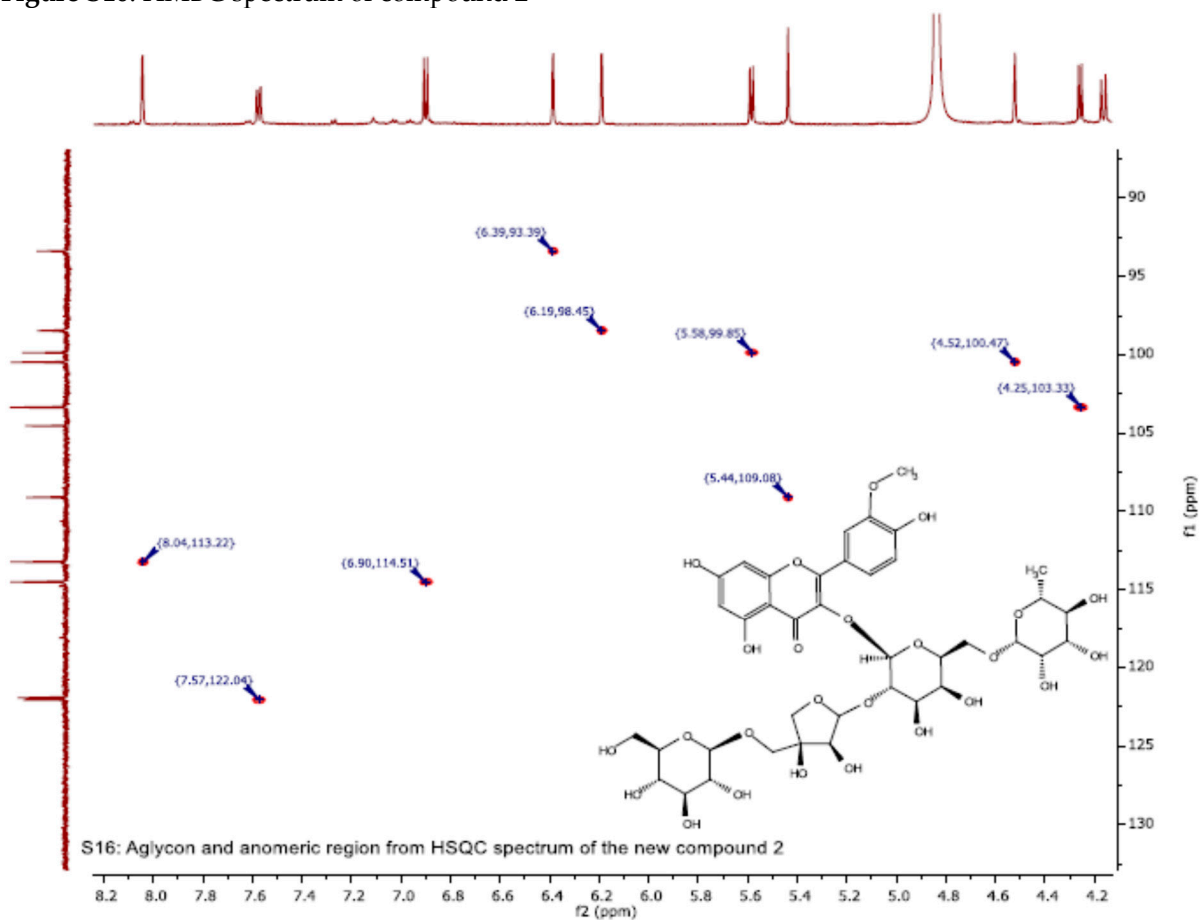

Figure S17: HSQC spectrum of compound 2 (aglycon and anomeric region)

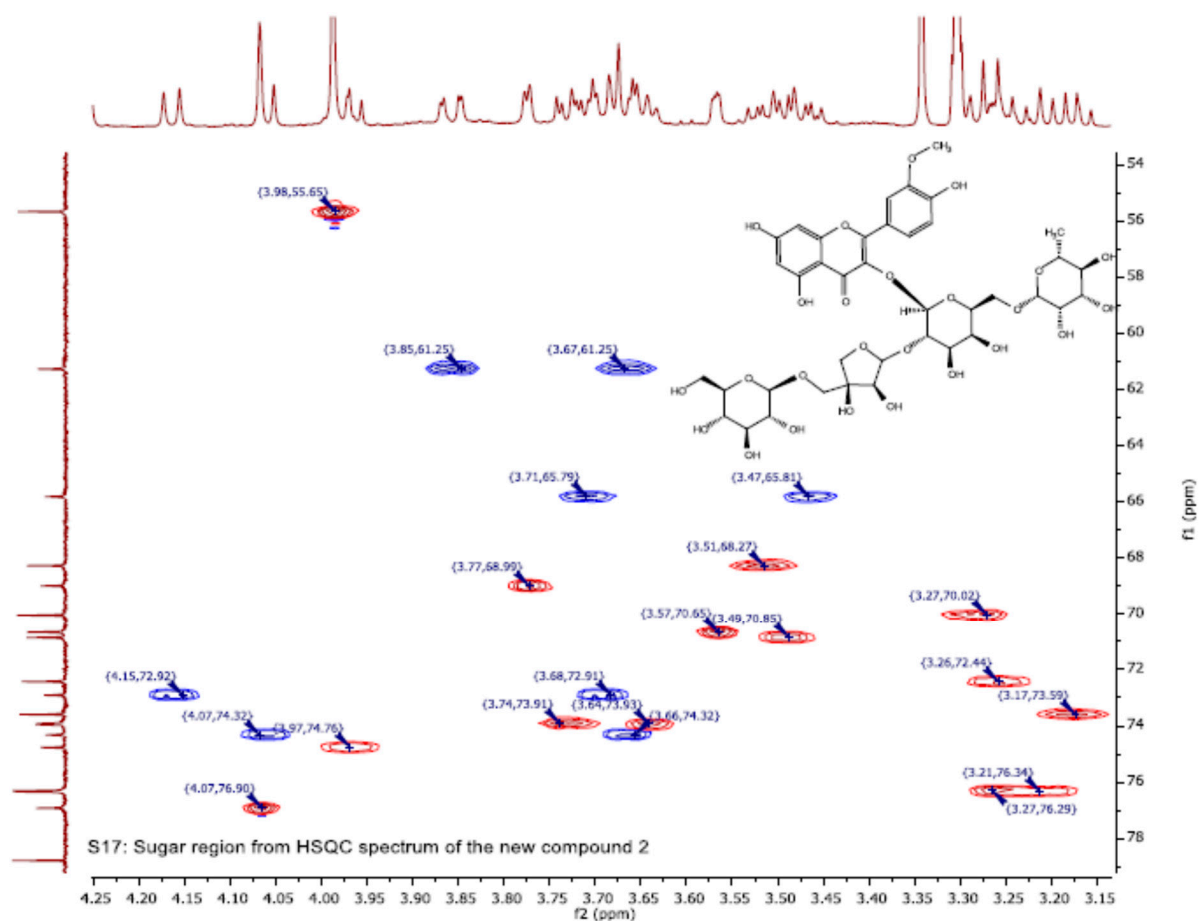

Figure S18: HSQC spectrum of compound 2 (sugar region)

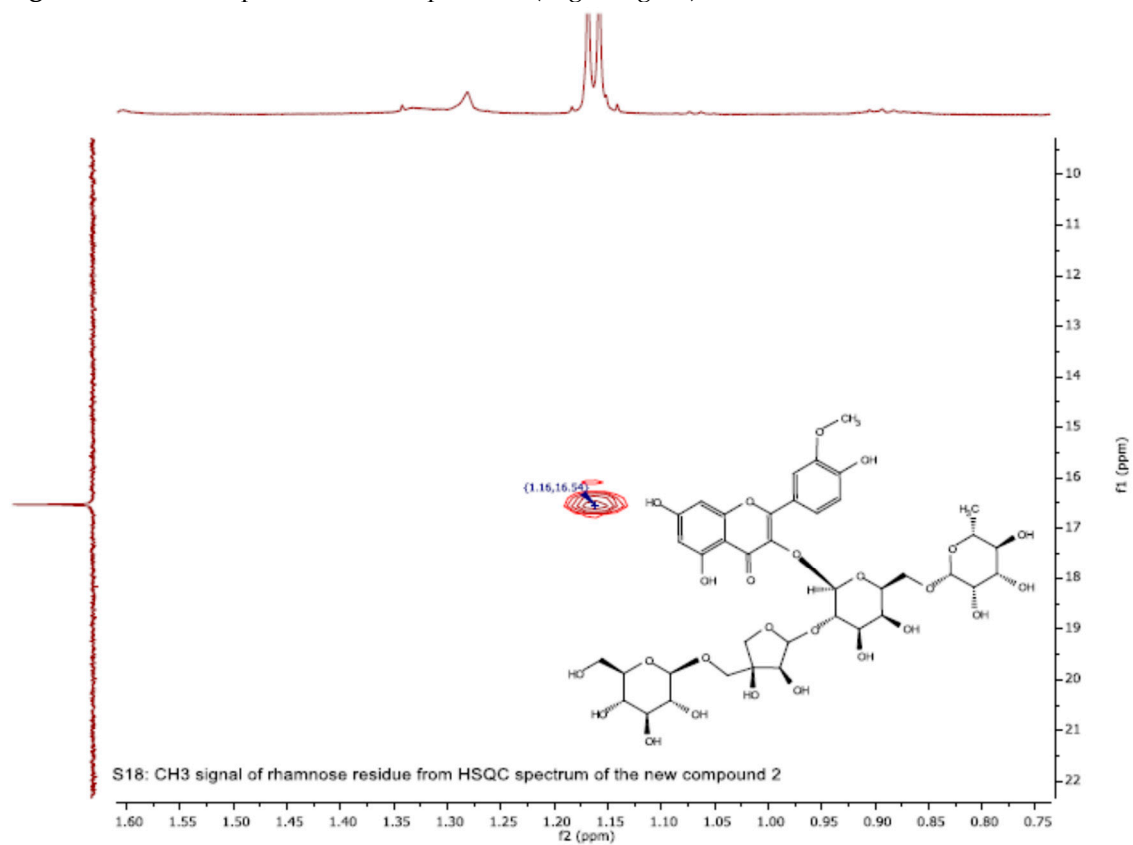

Figure S19: HSQC spectrum of compound 2 (methyl signal of rhamnose moiety)

Histo\_08\_161219 #2797-2849 RT: 6.40-6.5  
T: FTMS - p ESI Full ms [100.00-1500.00]

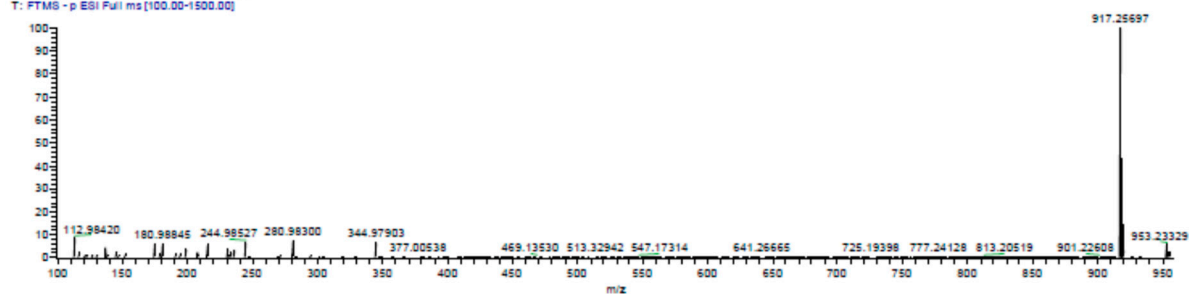

Figure S20: HR-ESI-MS (negative mode) of compound 2

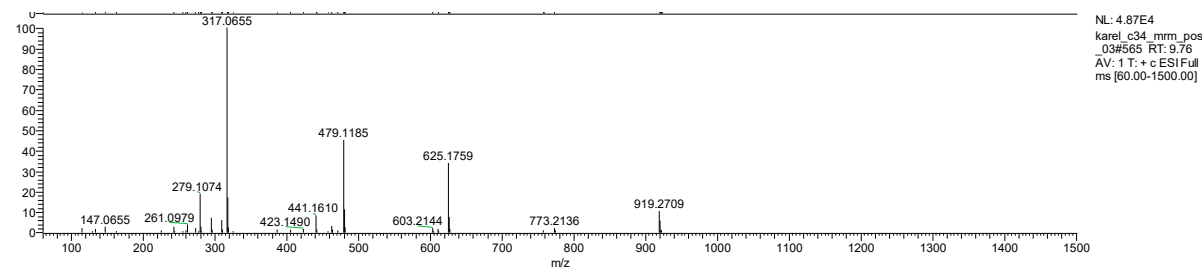

Figure S21: HR-ESI-MS (positive mode) of compound 2

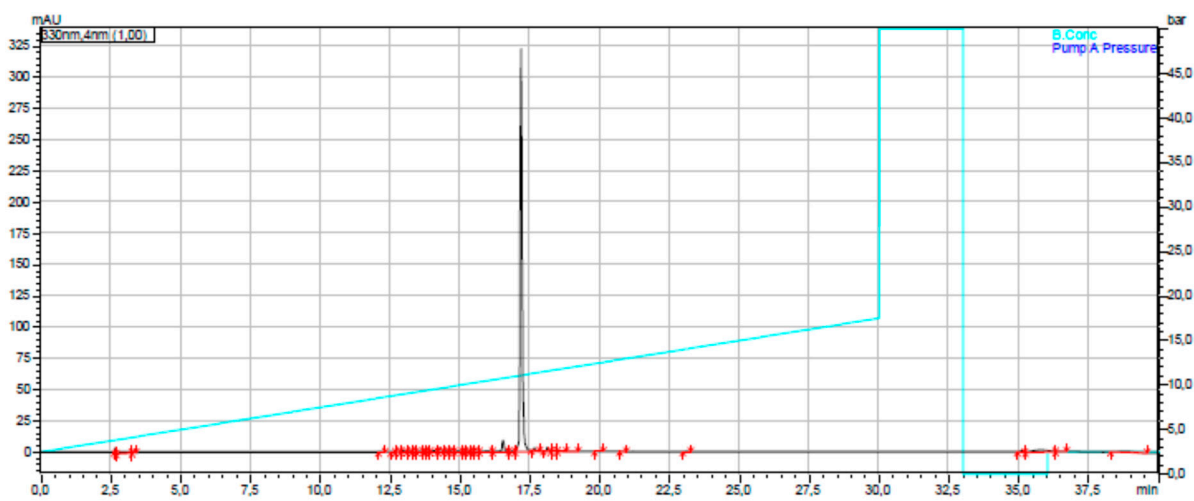

Figure S22: HPLC chromatogram of compound 2

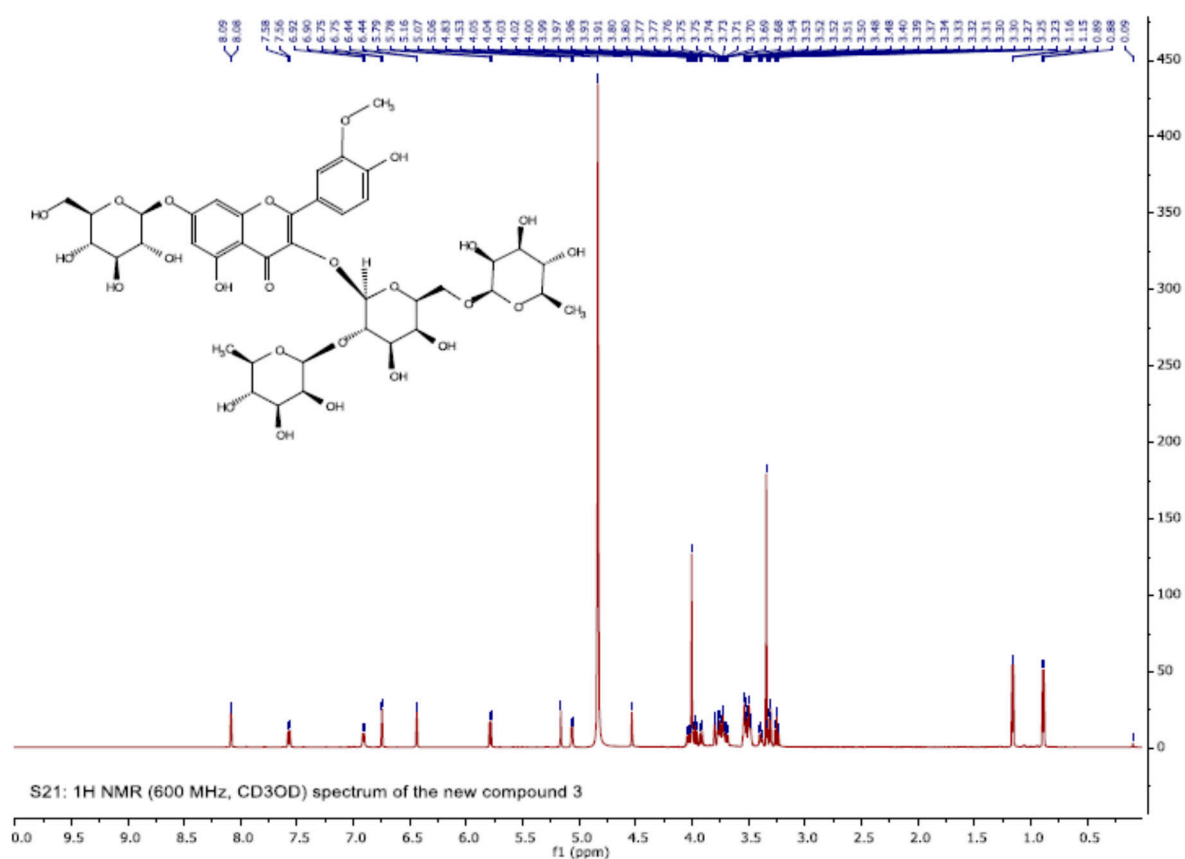

Figure S23: <sup>1</sup>H NMR (600 MHz, CD<sub>3</sub>OD) spectrum of compound 3

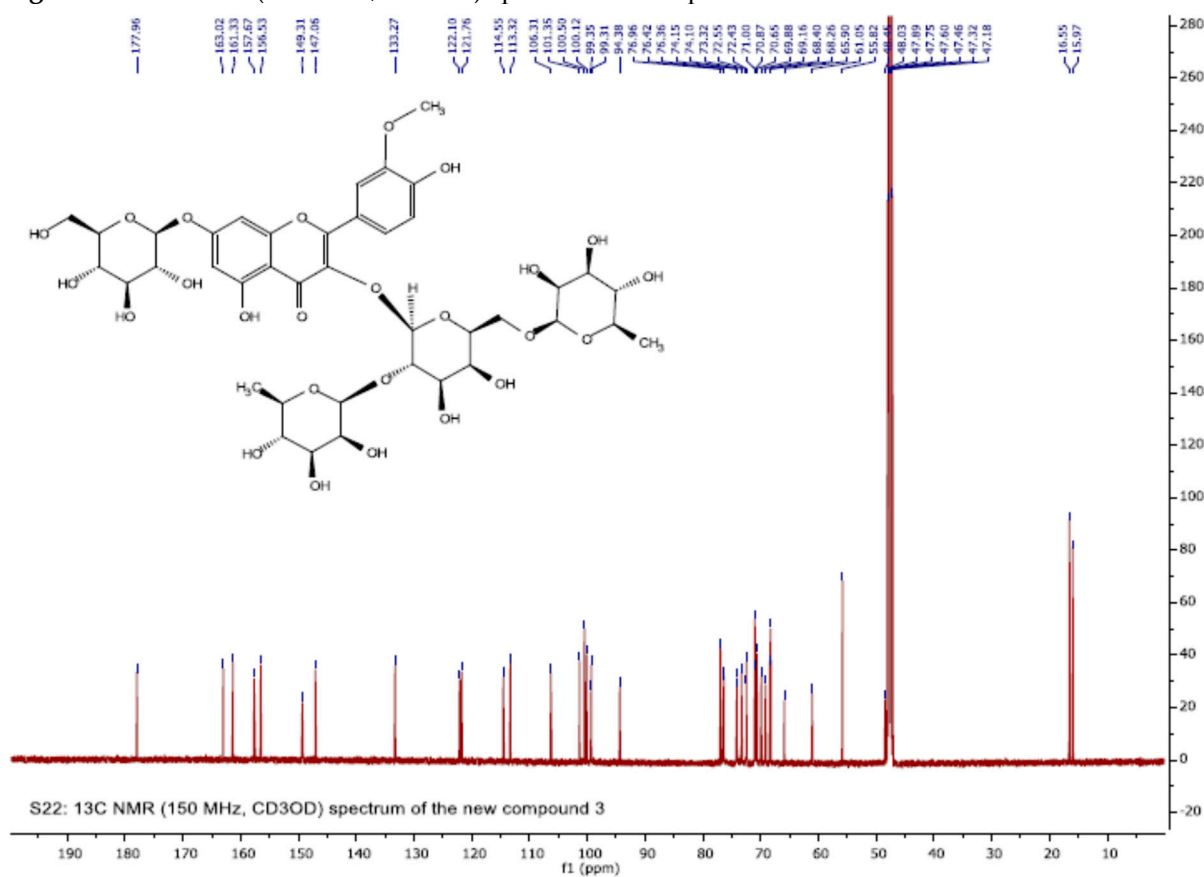

Figure S24: <sup>13</sup>C NMR (600 MHz, CD<sub>3</sub>OD) spectrum of compound 3

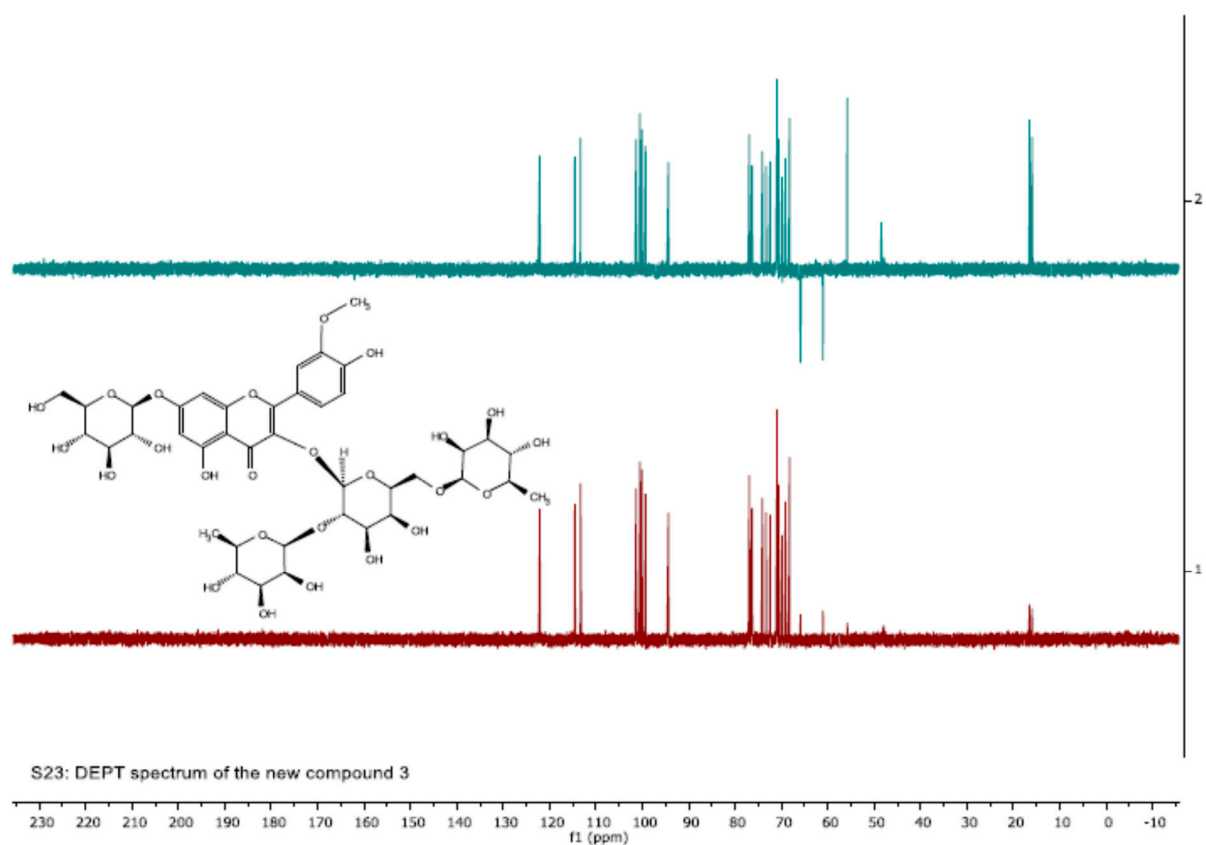

Figure S25: DEPT spectrum of compound 3

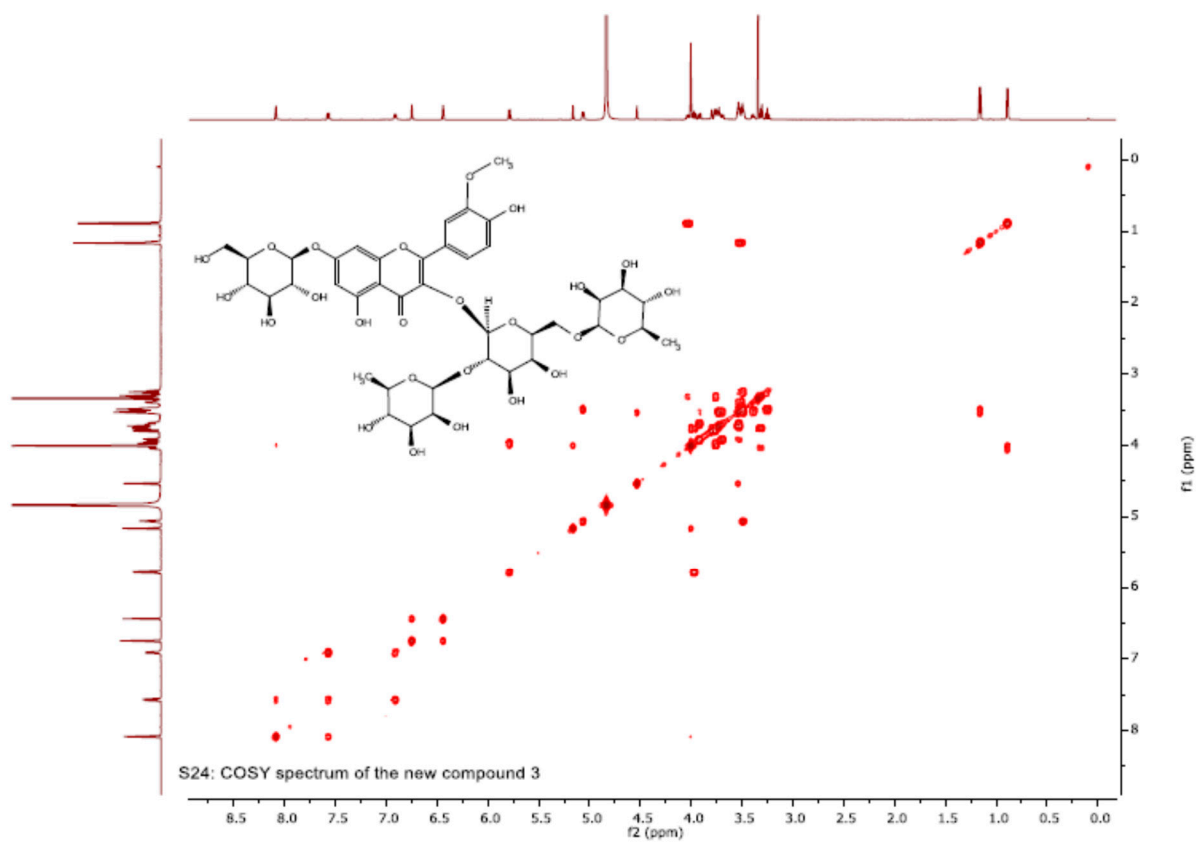

Figure S26: COSY spectrum of compound 3



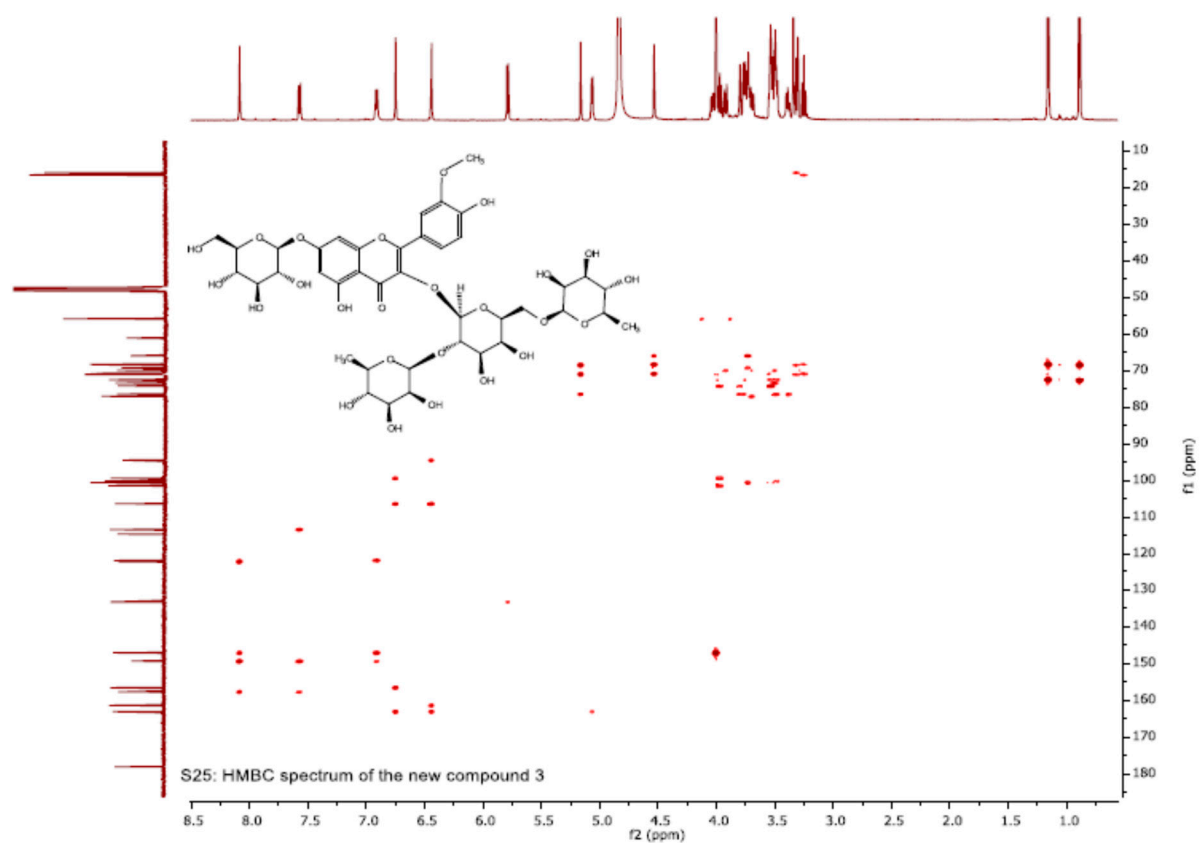

Figure S27: HMBC spectrum of compound 3

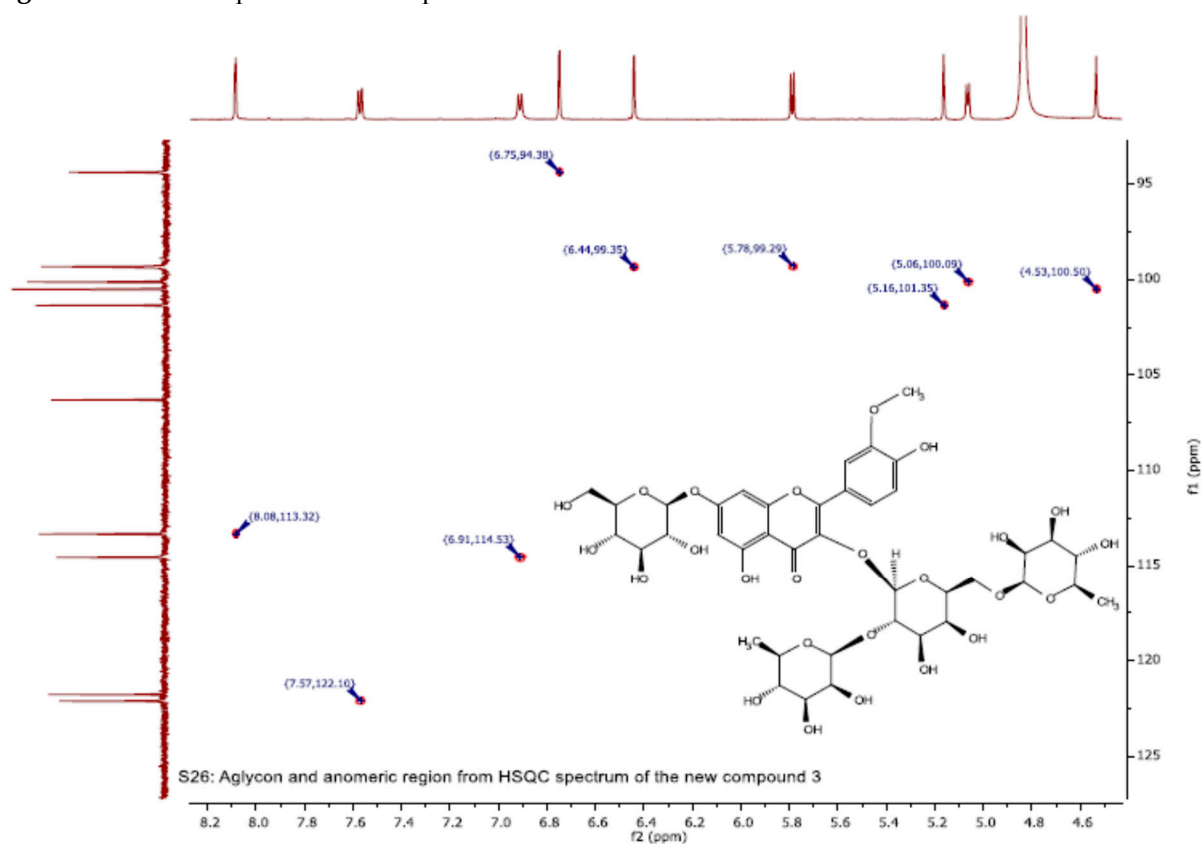

Figure S28: HSQC spectrum of compound 3 (aglycon and anomeric region)

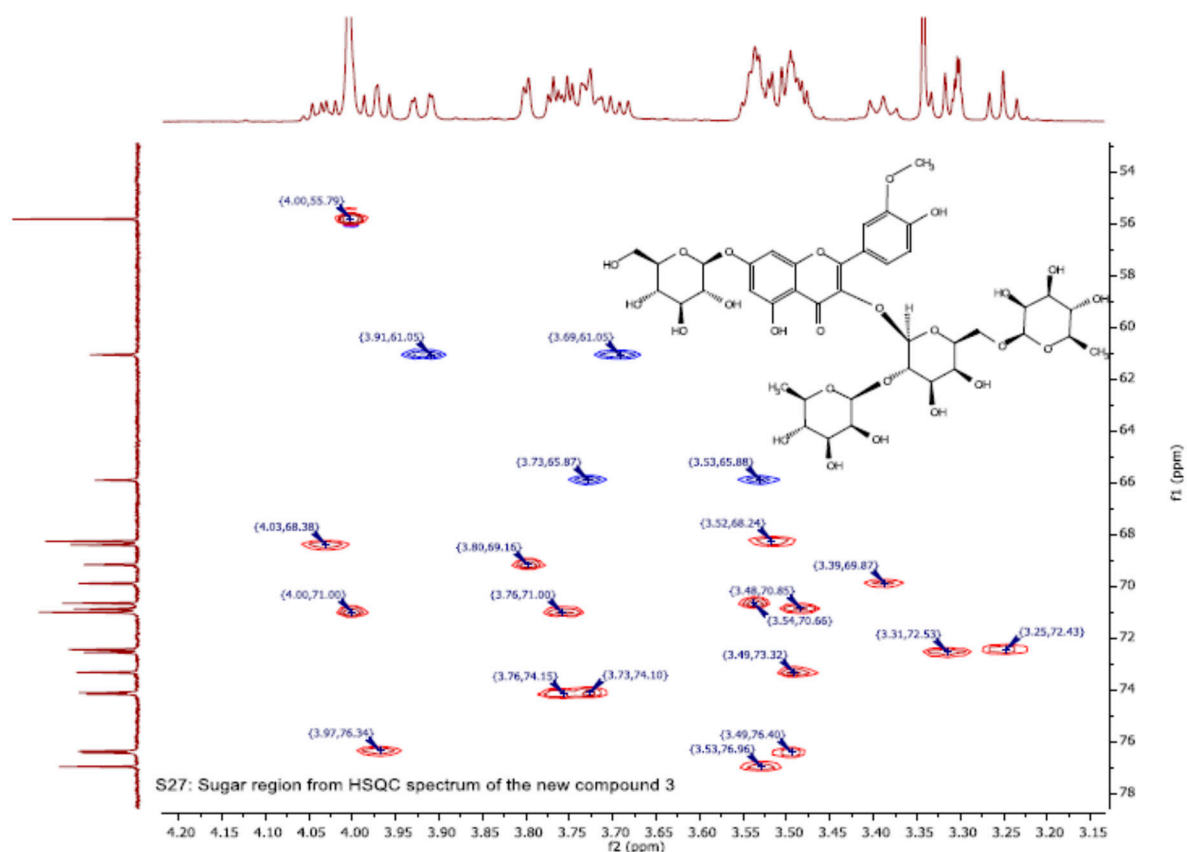

Figure S29: HSQC spectrum of compound 3 (sugar region)

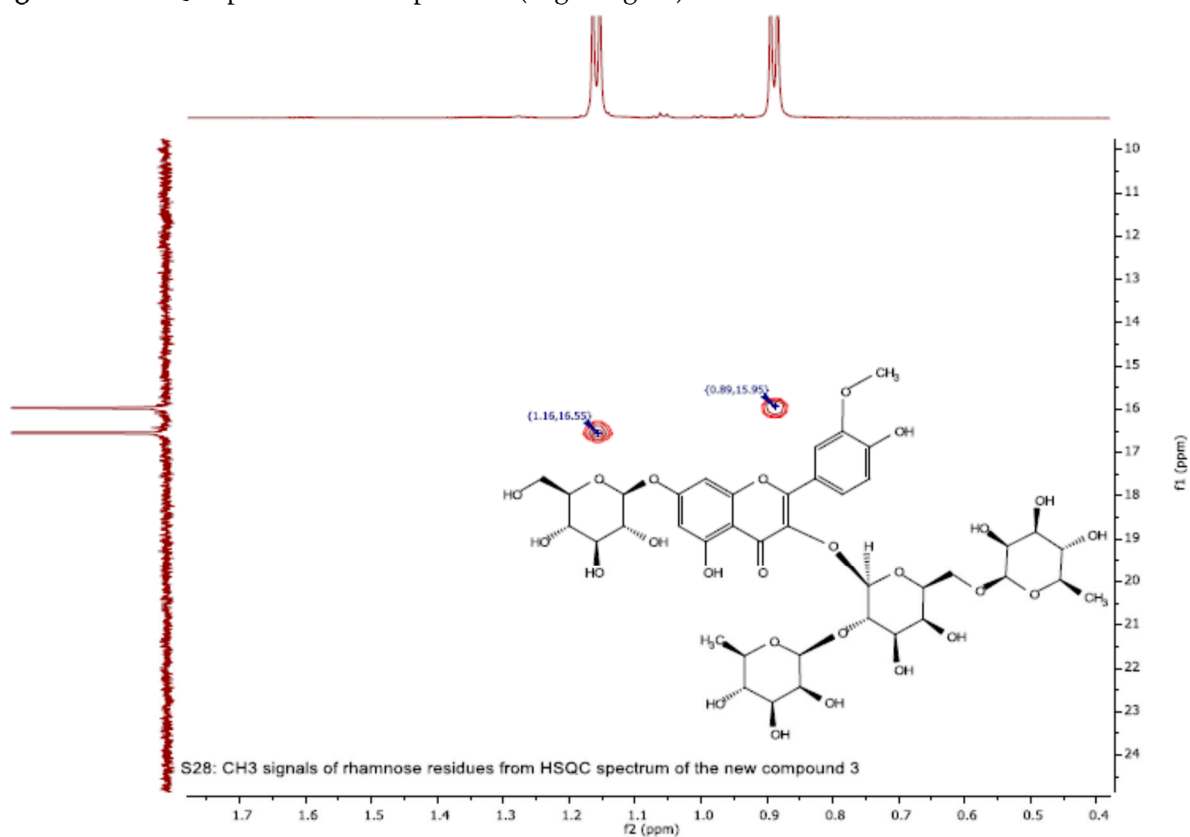

Figure S30: HSQC spectrum of compound 3 (methyl signals of rhamnose moieties)

Histo\_07\_161219 #1925-2011 RT: 4.53-4.7  
T: FTMS - p ESI Full ms [100.00-1500.00]

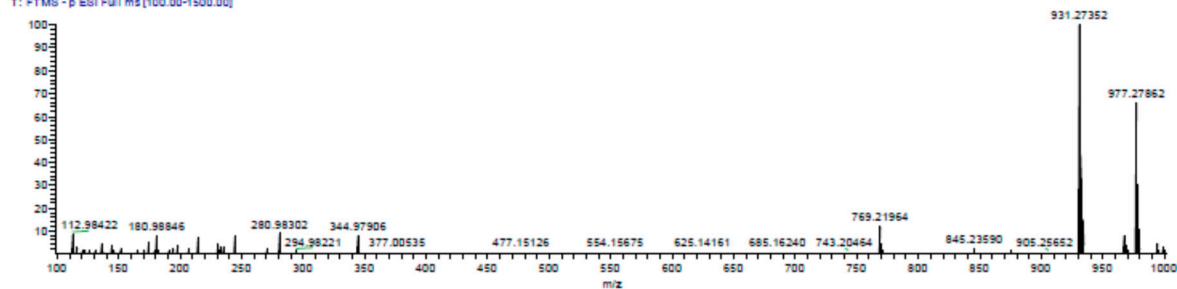

Histo\_07\_161219 #1940-2024 RT: 4.56-4.74 AV: 2 NL: 1.17E5  
T: Average spectrum MS2 931.27 (1940-2024)

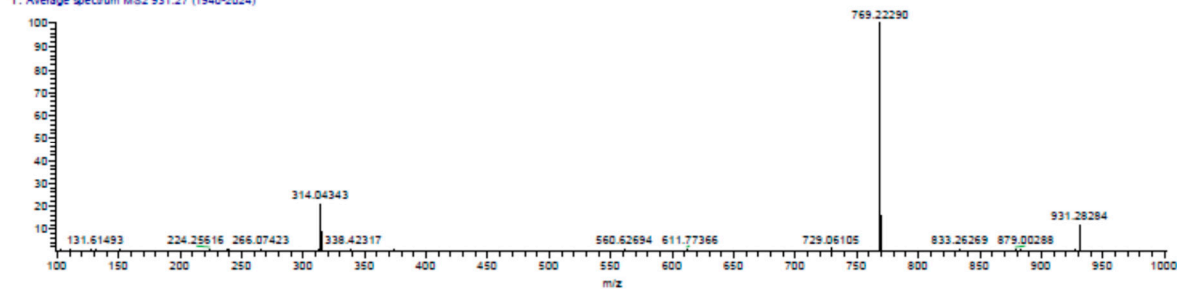

S29: HR-ESI-MS (ESI negative mode) spectrum of the new compound 3

Up: full-scan

Down: MS2 of 931.27352 m/z

**Figure S31:** HR-ESI-MS (negative mode) of compound 3

Karel\_3 B22-32\_MRM\_Pos\_01 #511 RT: 8.83 AV: 1 NL: 2.22E4  
T: + c ESI Full ms [60.00-1500.00]

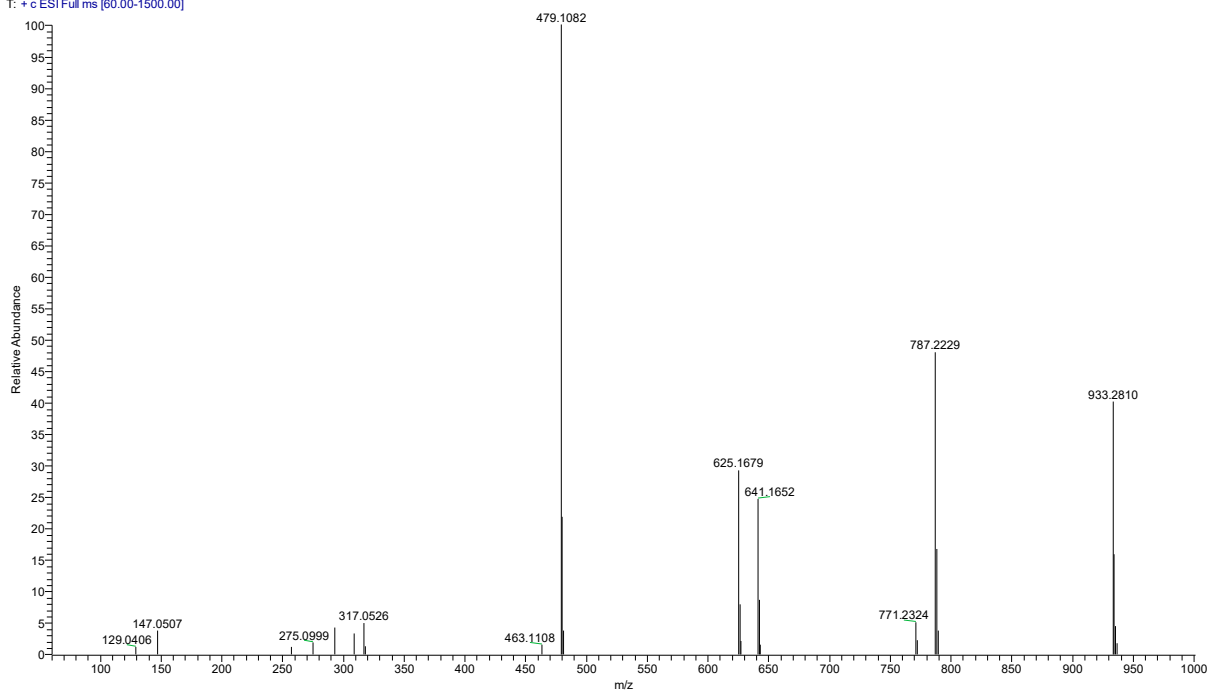

**Figure S32:** HR-ESI-MS (positive mode) of compound 3

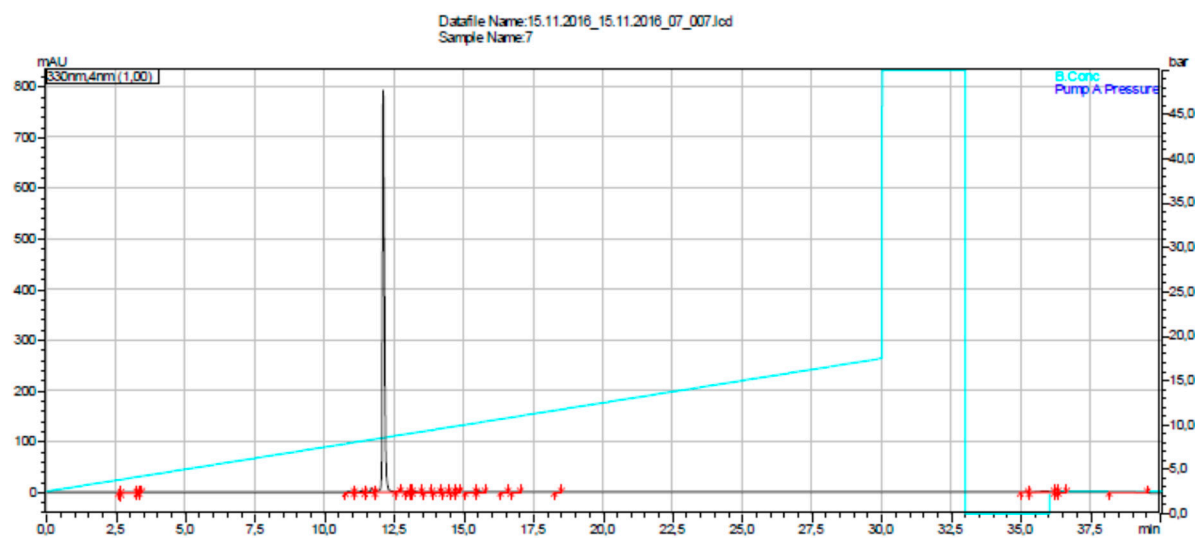

Figure S33: HPLC chromatogram of compound 3

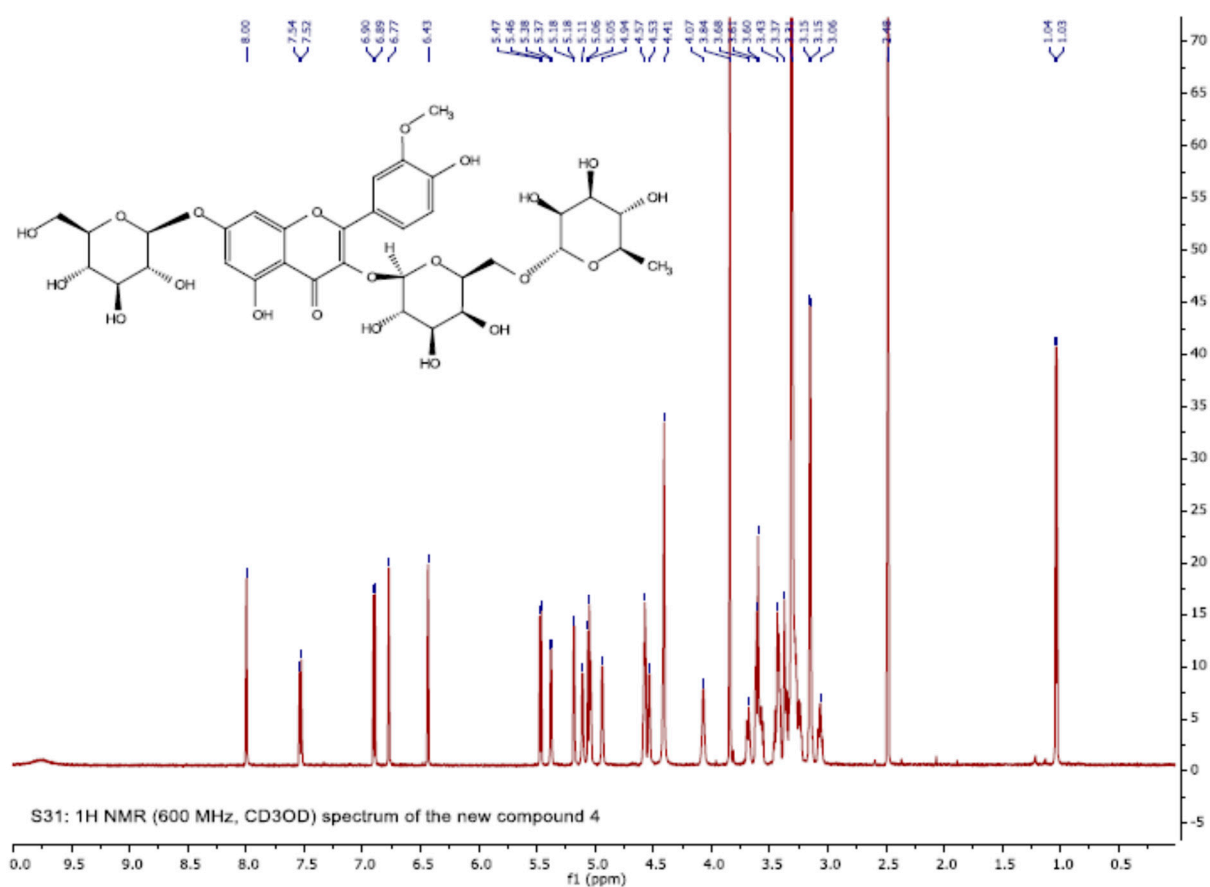

Figure S34:  $^1\text{H}$  NMR (600 MHz,  $\text{CD}_3\text{OD}$ ) spectrum of compound 4

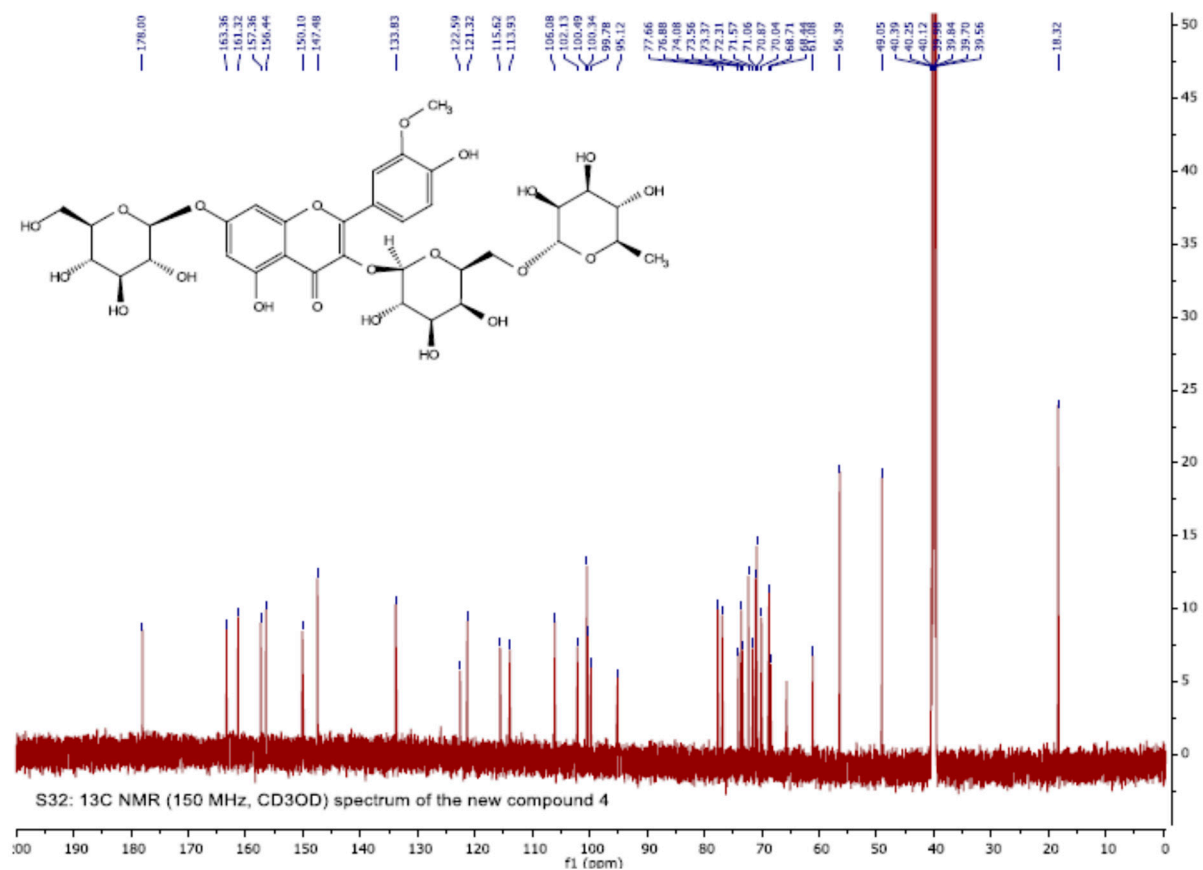

Figure S35:  $^{13}\text{C}$  NMR (150 MHz,  $\text{CD}_3\text{OD}$ ) spectrum of compound 4

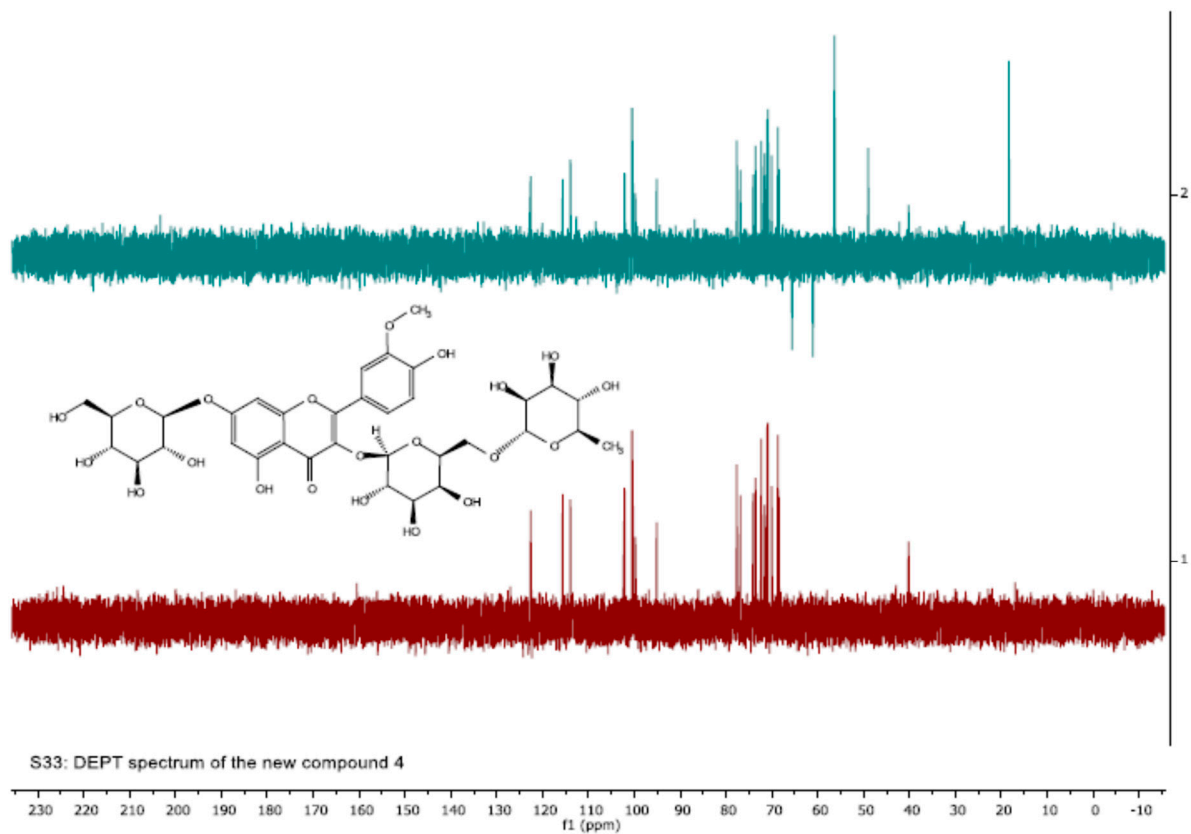

Figure S36: DEPT spectrum of compound 4

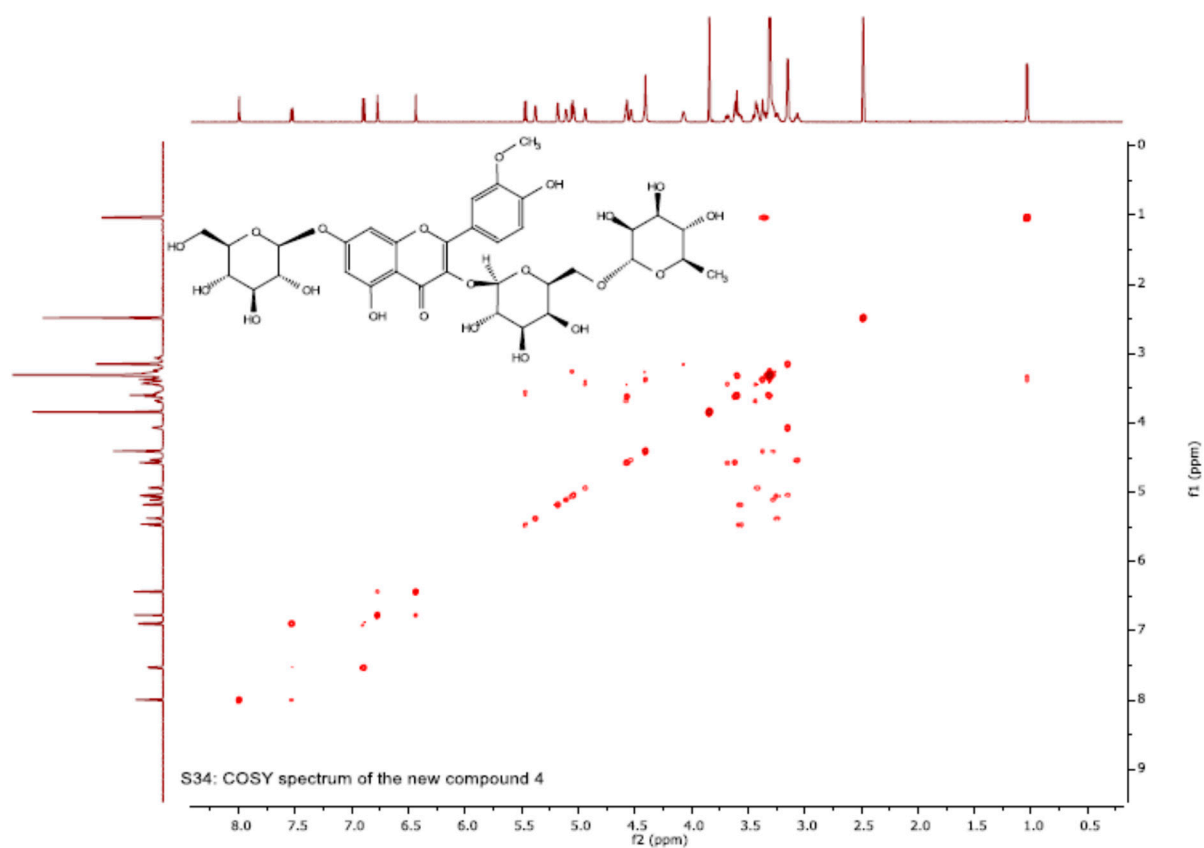

Figure S37: COSY spectrum of compound 4

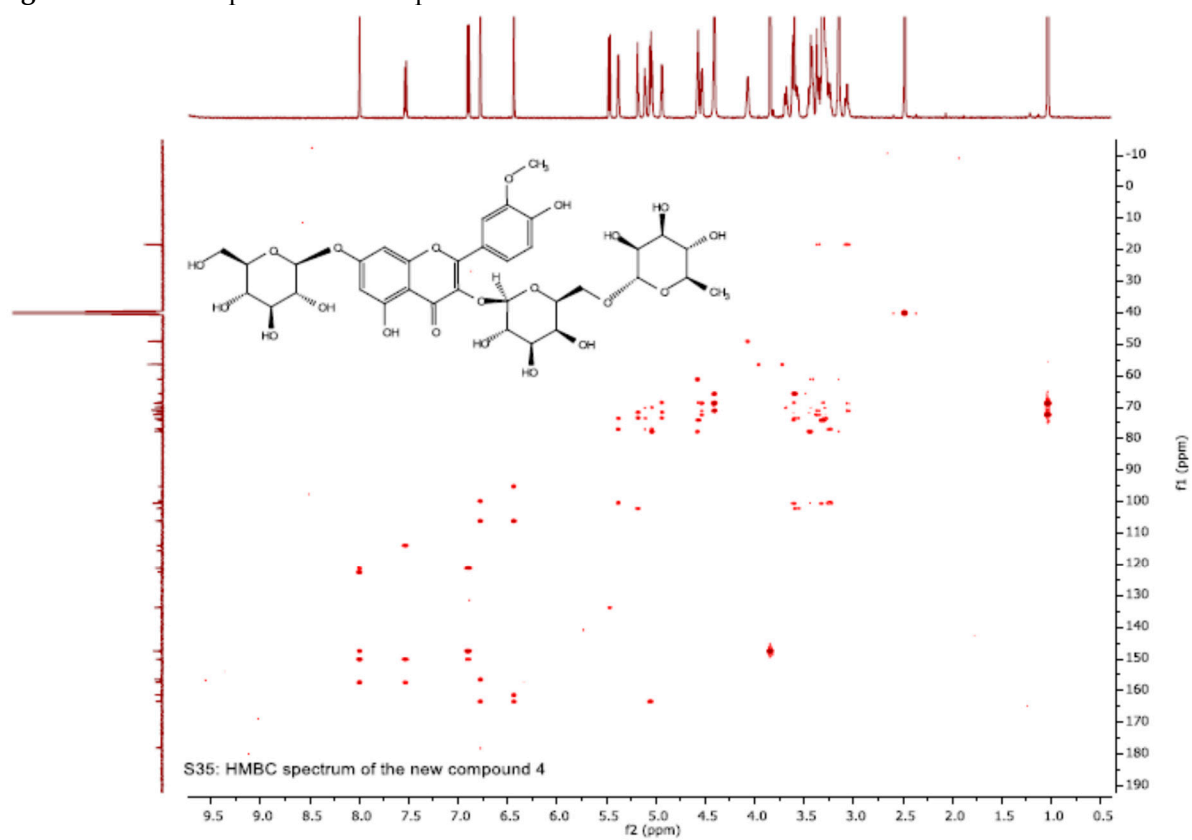

Figure S38: HMBC spectrum of compound 4

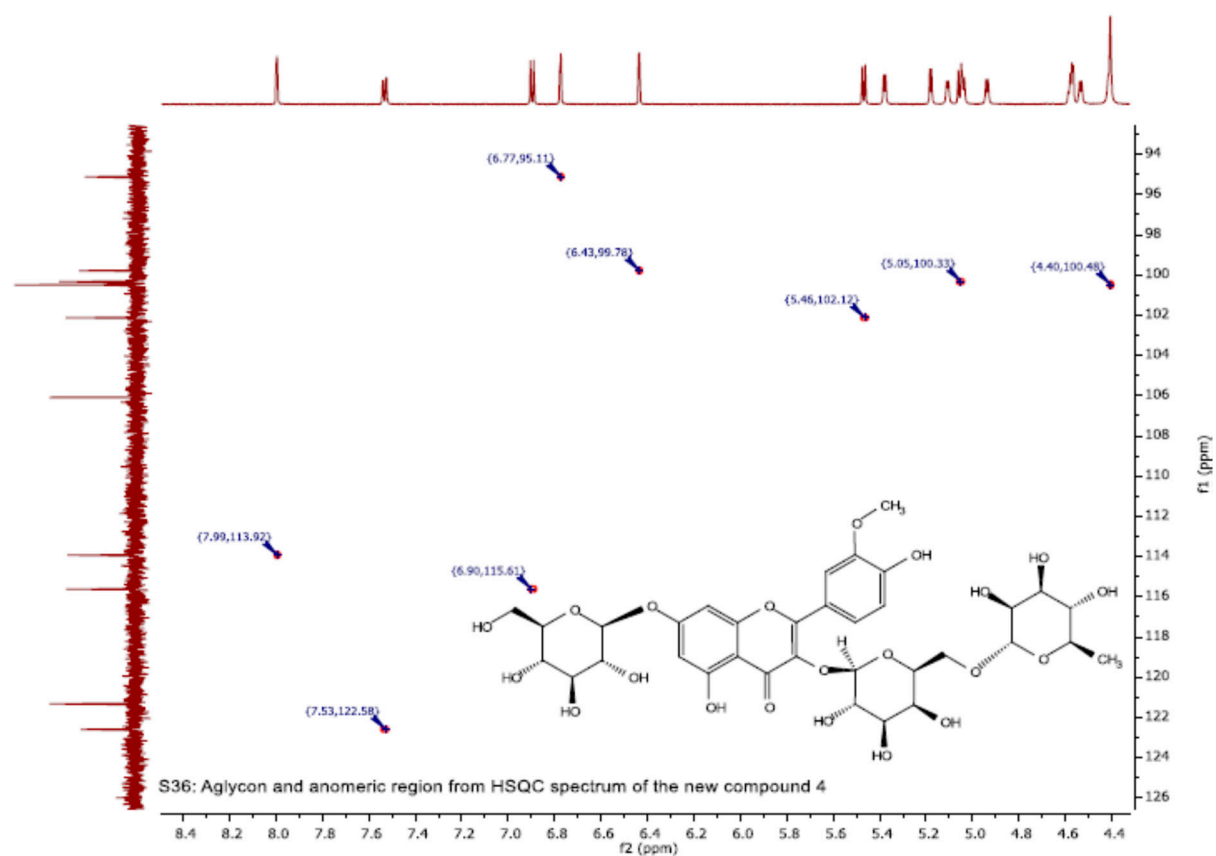

Figure S39: HSQC spectrum of compound 4 (aglycon and anomeric region)

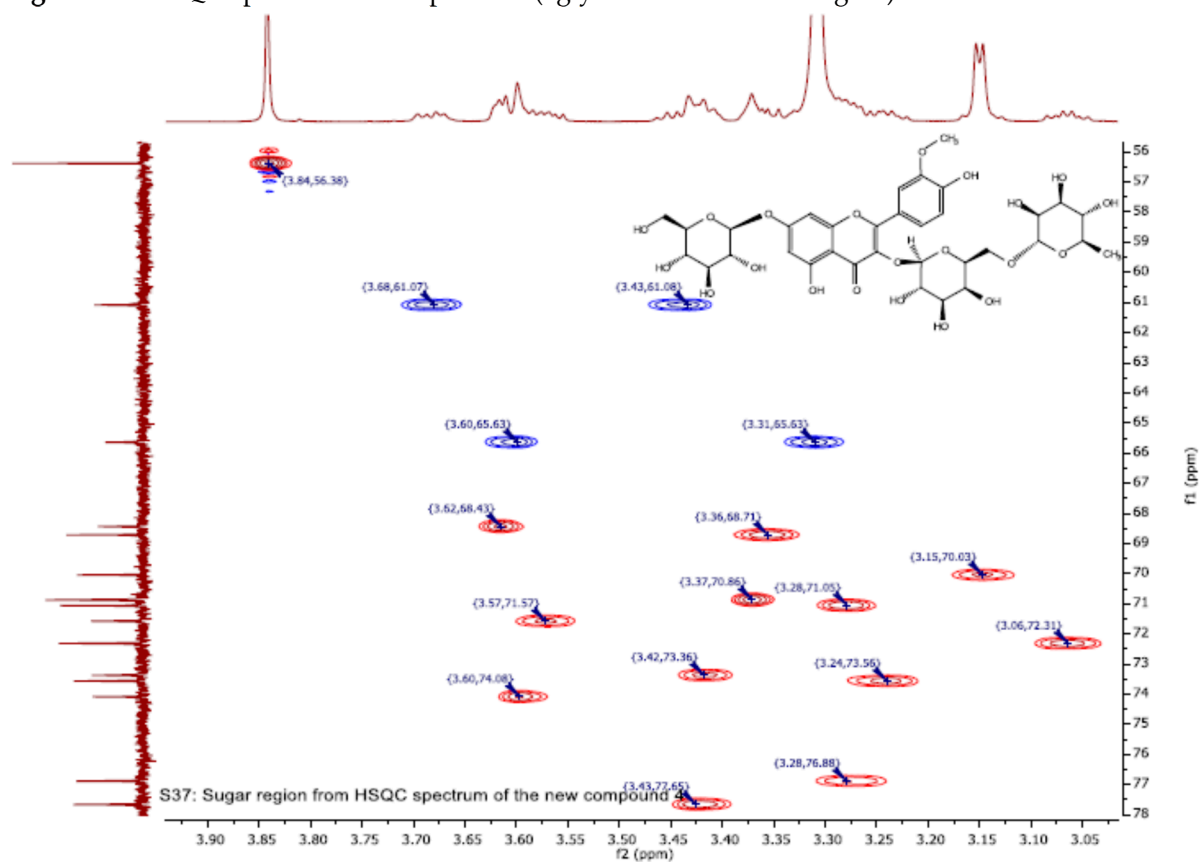

Figure S40: HSQC spectrum of compound 4 (sugar region)

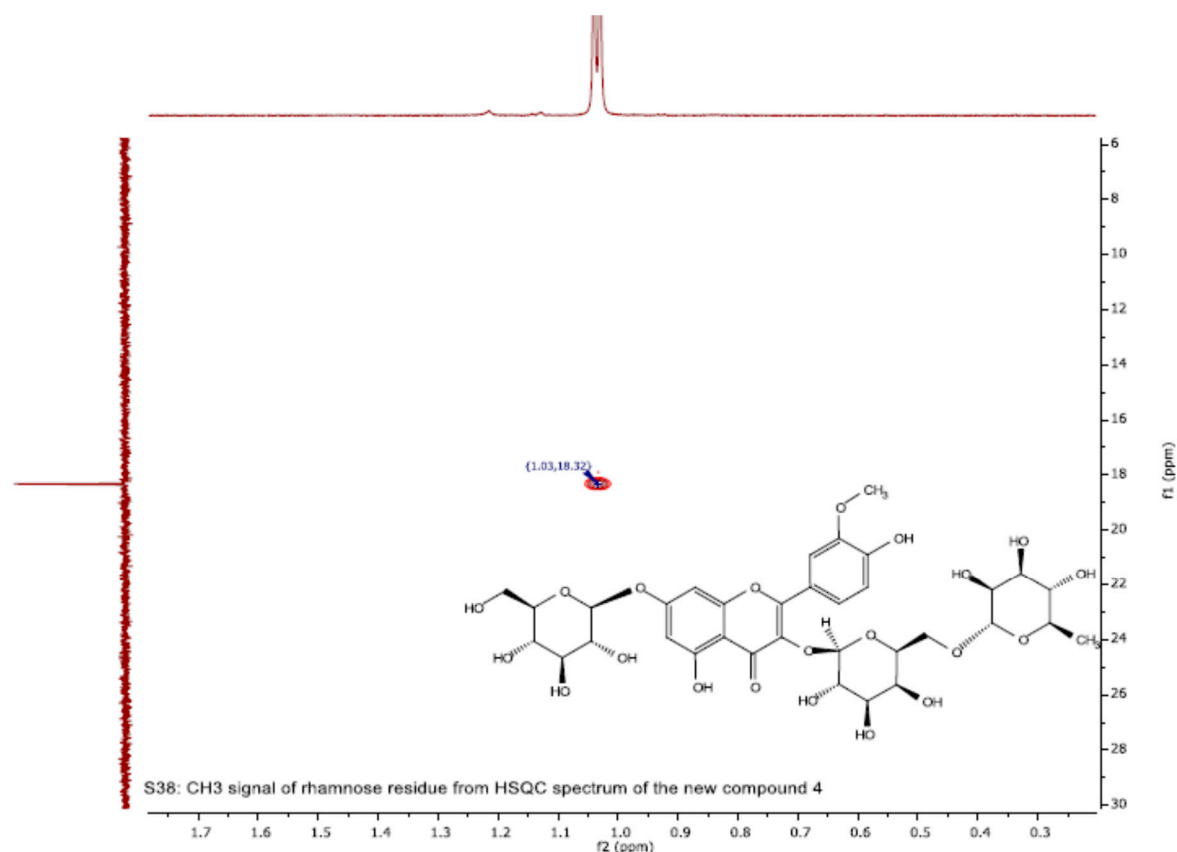

Figure S41: HSQC spectrum of compound 3 (methyl signals of rhamnose moiety)

E:\a PhD HR-MS BGL\Histo\_10\_

12/19/16 20:28:38

Hrldo\_10\_161219 #2230-2273 RT: 5.35-5.4  
T: FTMS - p ESI Full ms [100.00-1500.00]

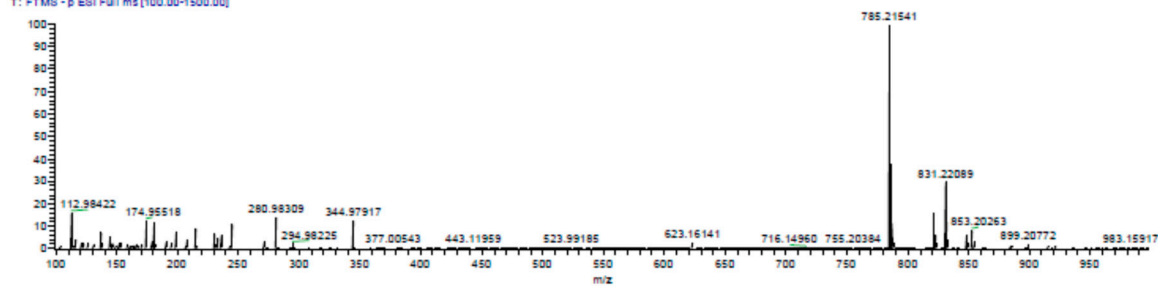

Hrldo\_10\_161219 #2236 RT: 5.36 AV: 1 NL: 9.5254  
T: FTMS - p ESI d Full ms2 785.22@hcd18.33 [54.67-820.00]

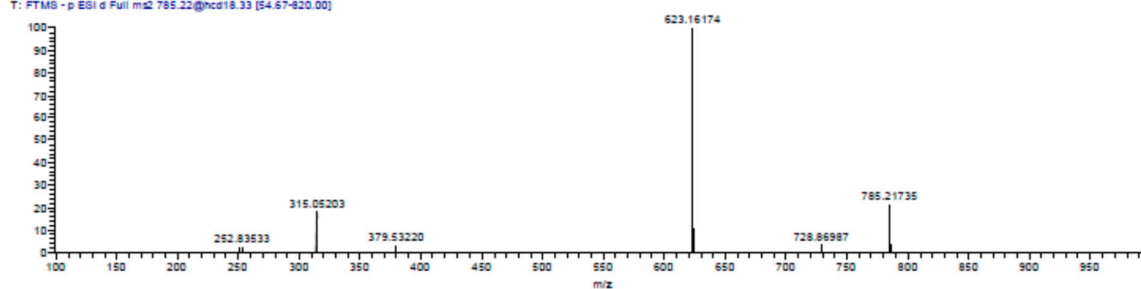

S39: HR-ESI-MS (ESI negative mode) spectrum of the new compound 4

Up: full-scan

Down: MS2 of 785.21541 m/z

Figure S42: HR-ESI-MS (negative mode) of compound 4



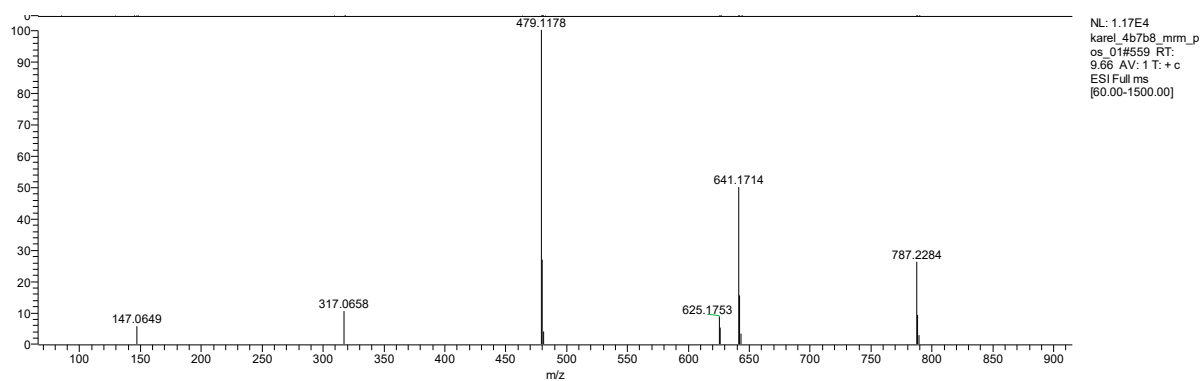

Figure S43: HR-ESI-MS (positive mode) of compound 4

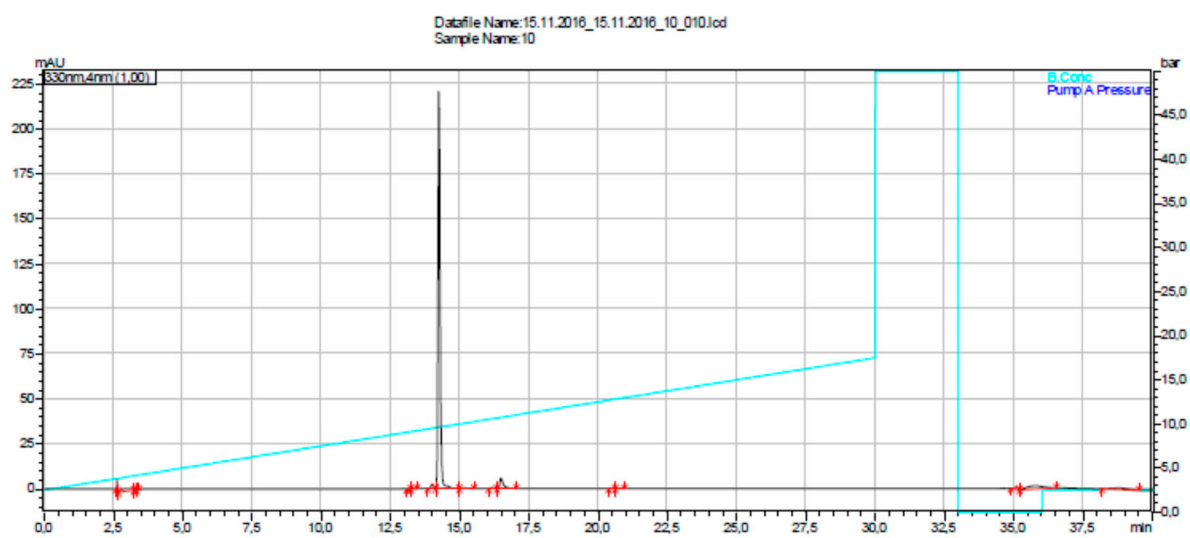

Figure S44: HPLC chromatogram of compound 4

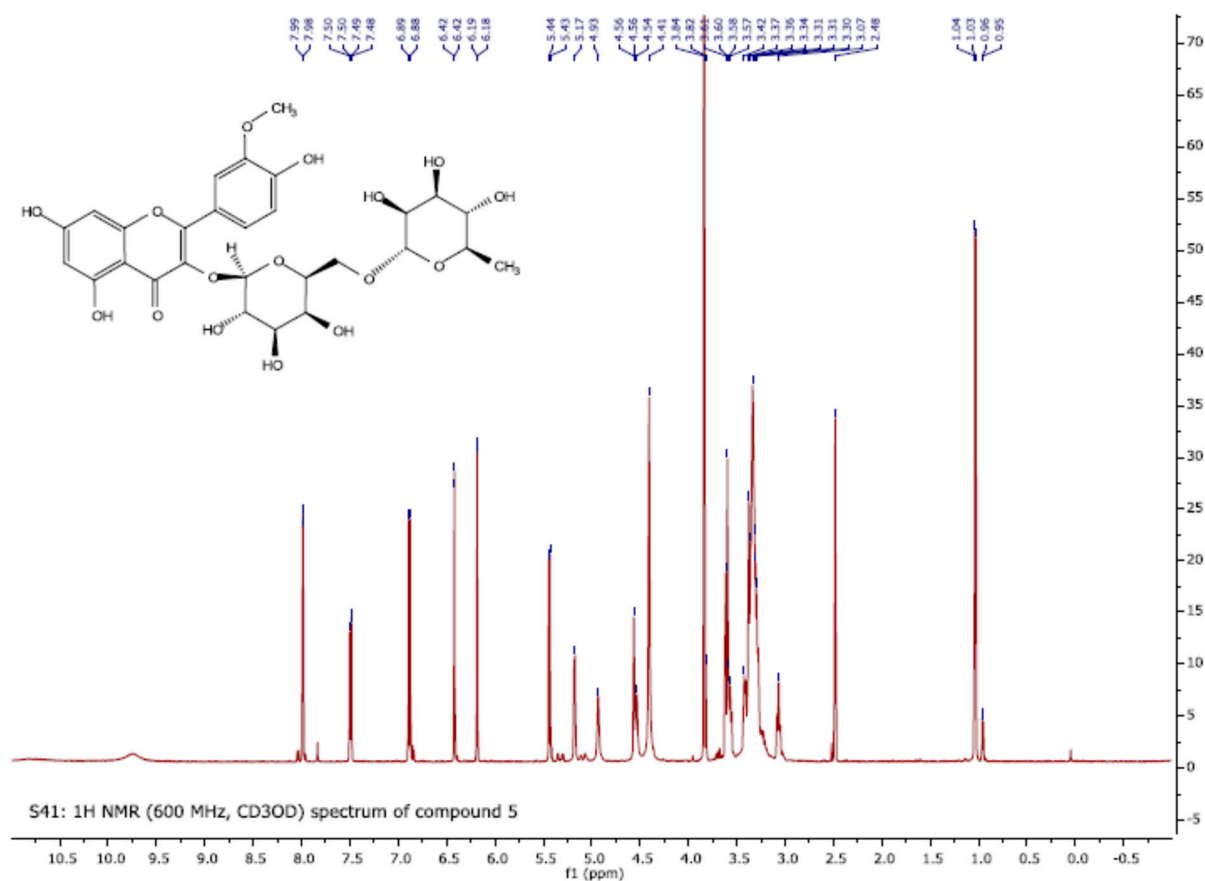

Figure S45:  $^1\text{H}$  NMR (600 MHz,  $\text{CD}_3\text{OD}$ ) spectrum of compound 5

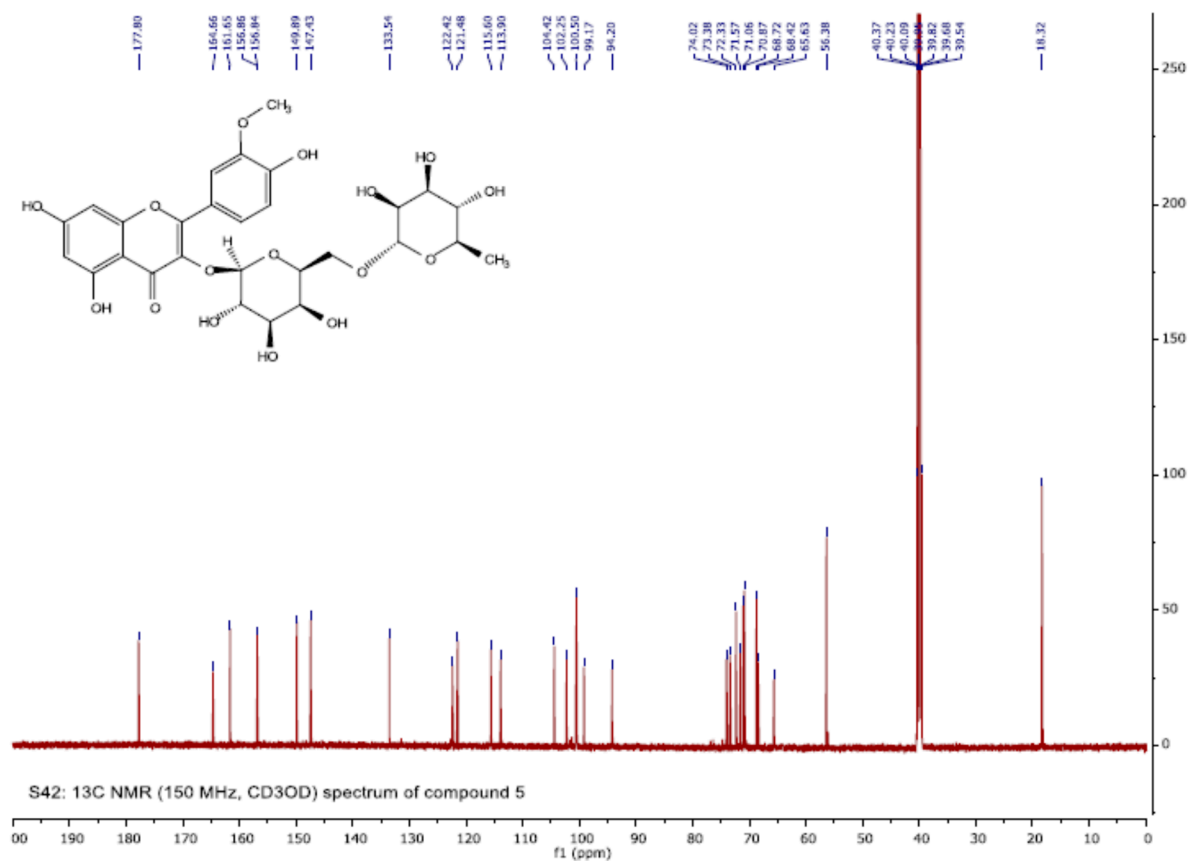

Figure S46:  $^{13}\text{C}$  NMR (150 MHz,  $\text{CD}_3\text{OD}$ ) spectrum of compound 5

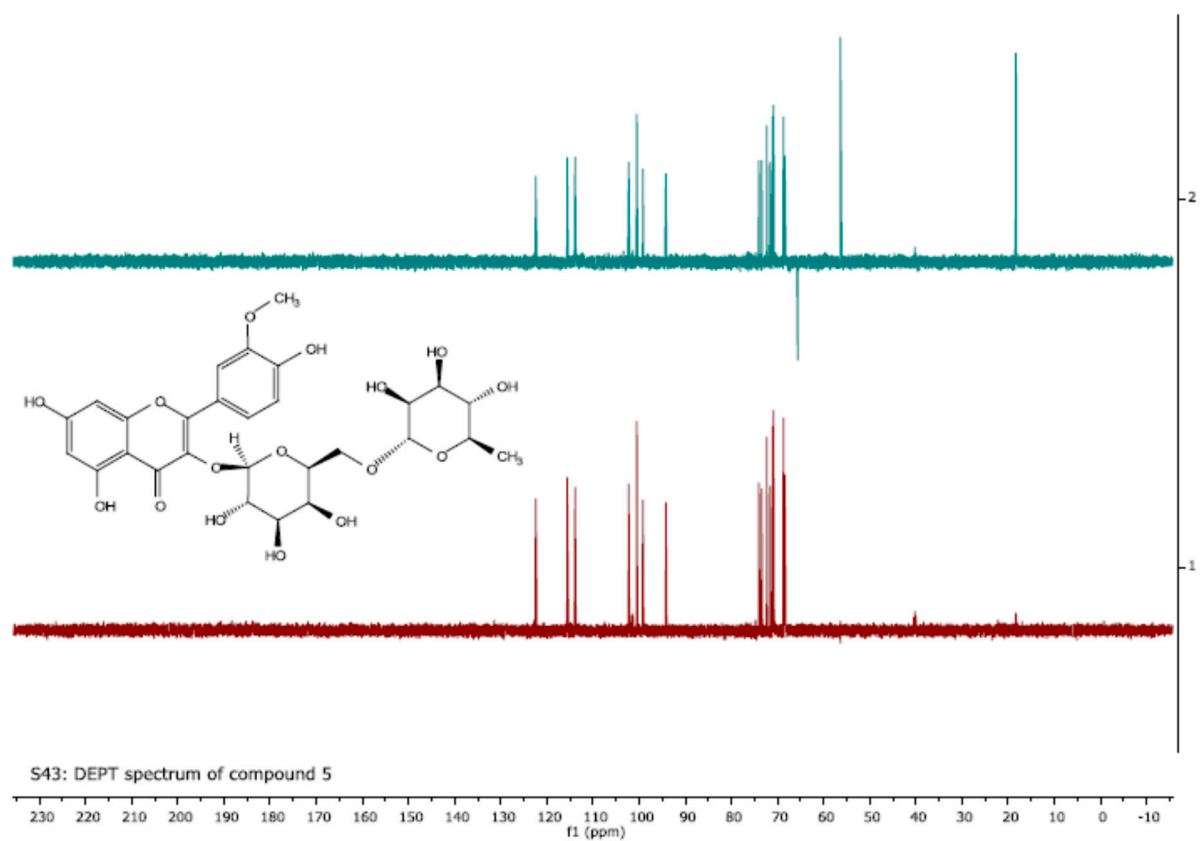

Figure S47: DEPT spectrum of compound 5

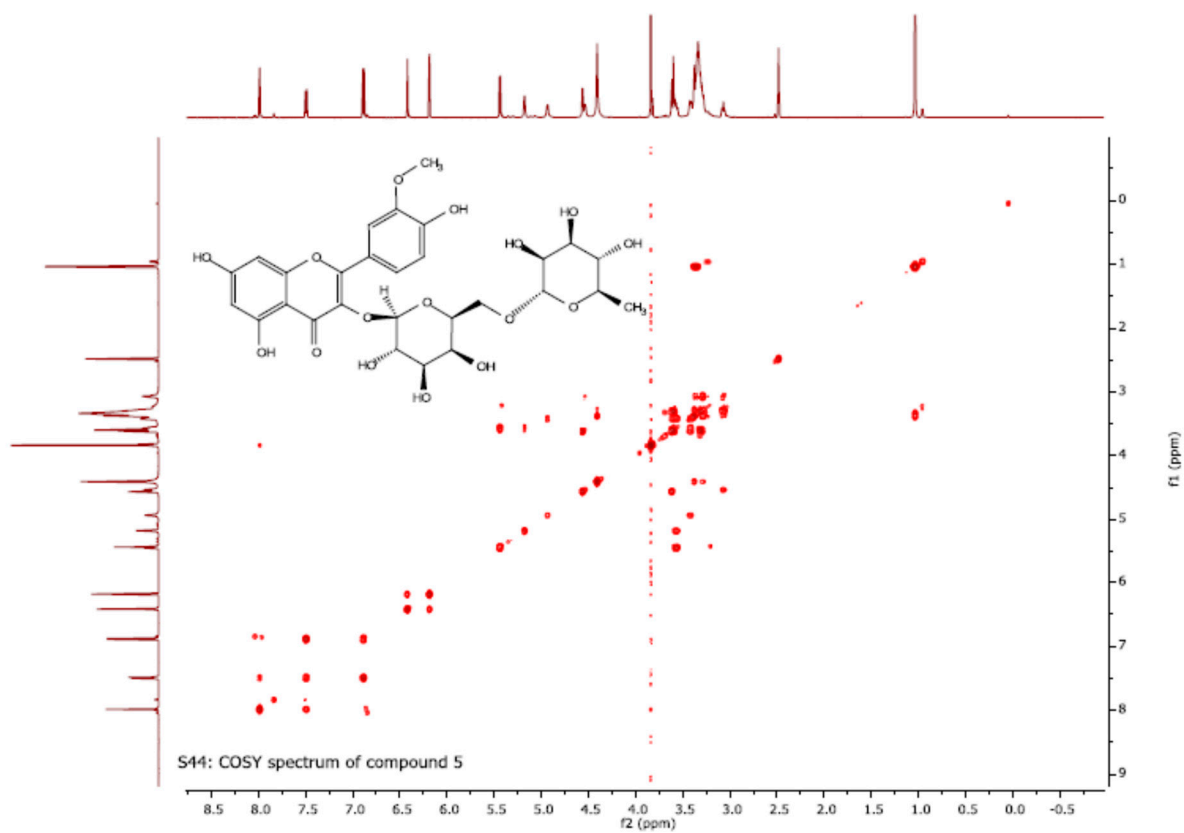

Figure S48: COSY spectrum of compound 5

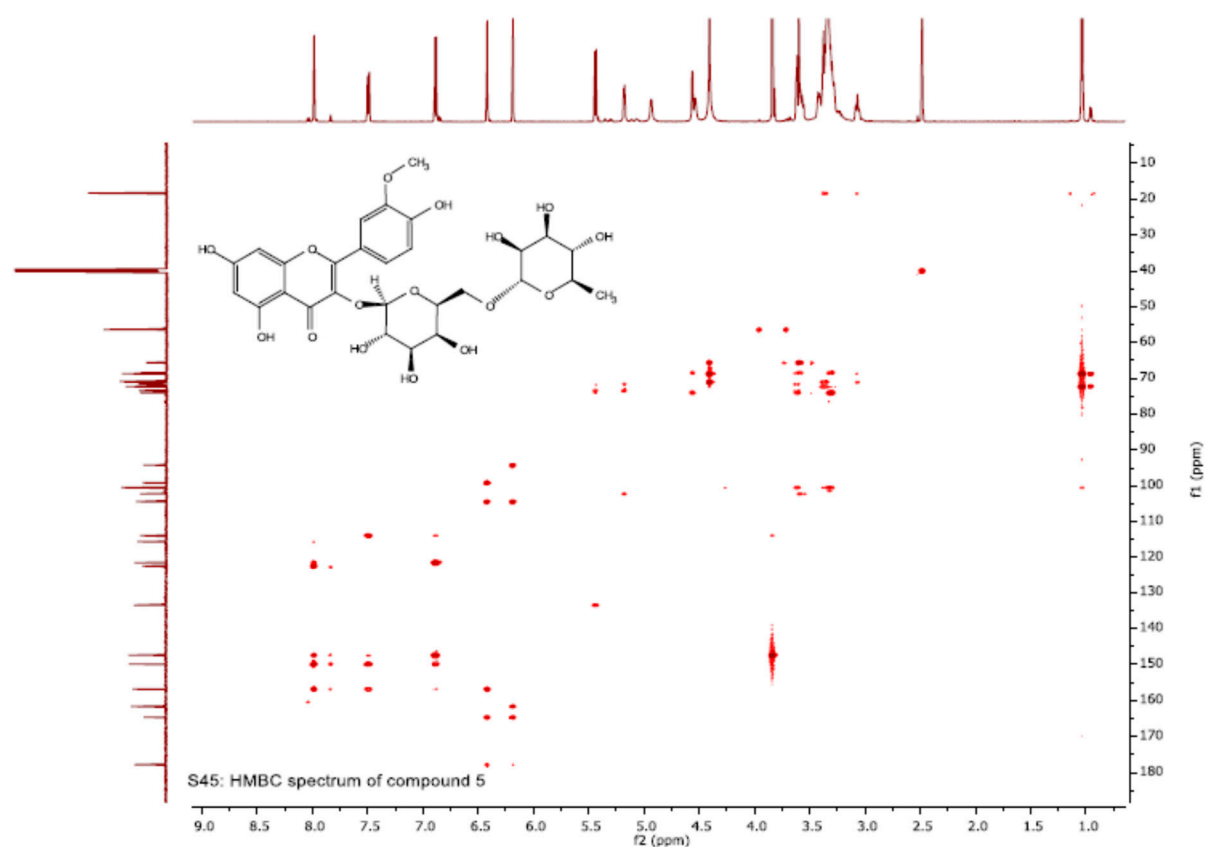

Figure S49: HMBC spectrum of compound 5

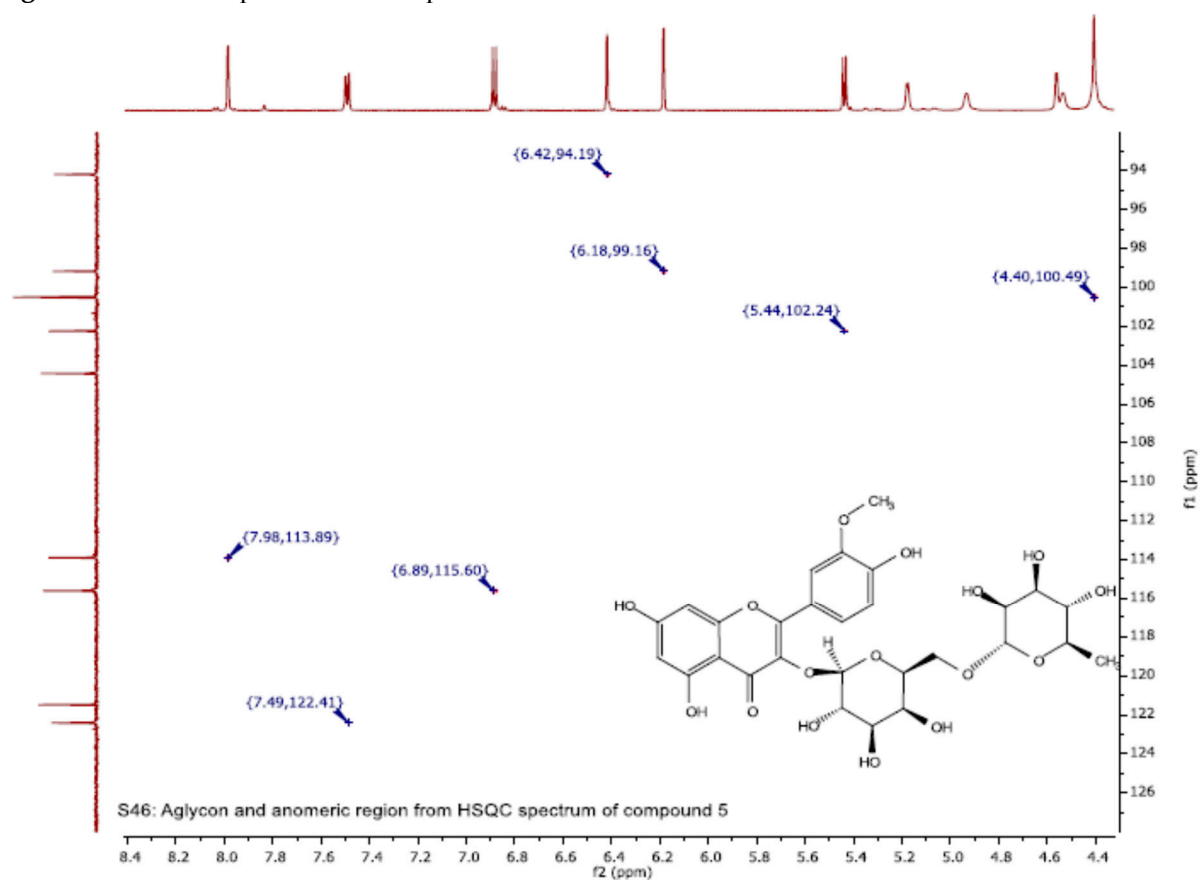

Figure S50: HSQC spectrum of compound 5 (aglycon and anomeric region)

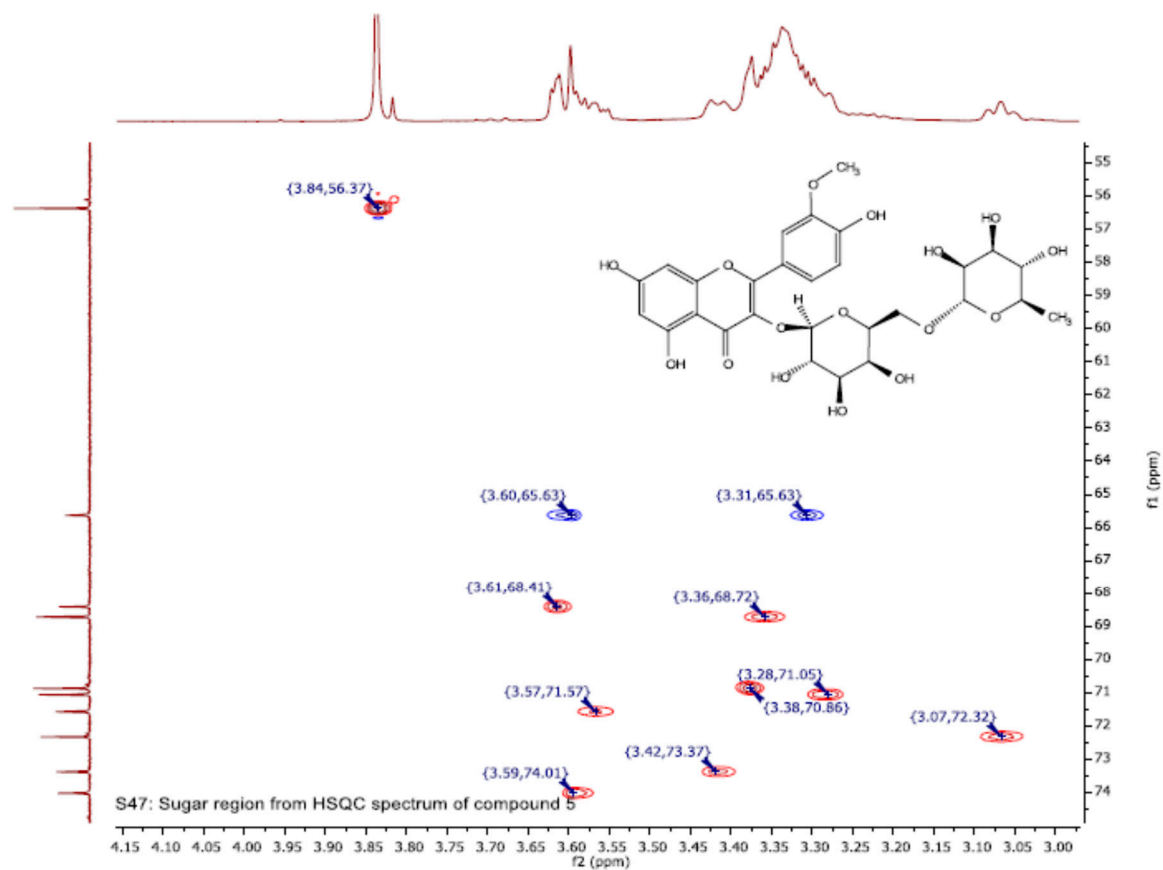

Figure S51: HSQC spectrum of compound 5 (sugar region)

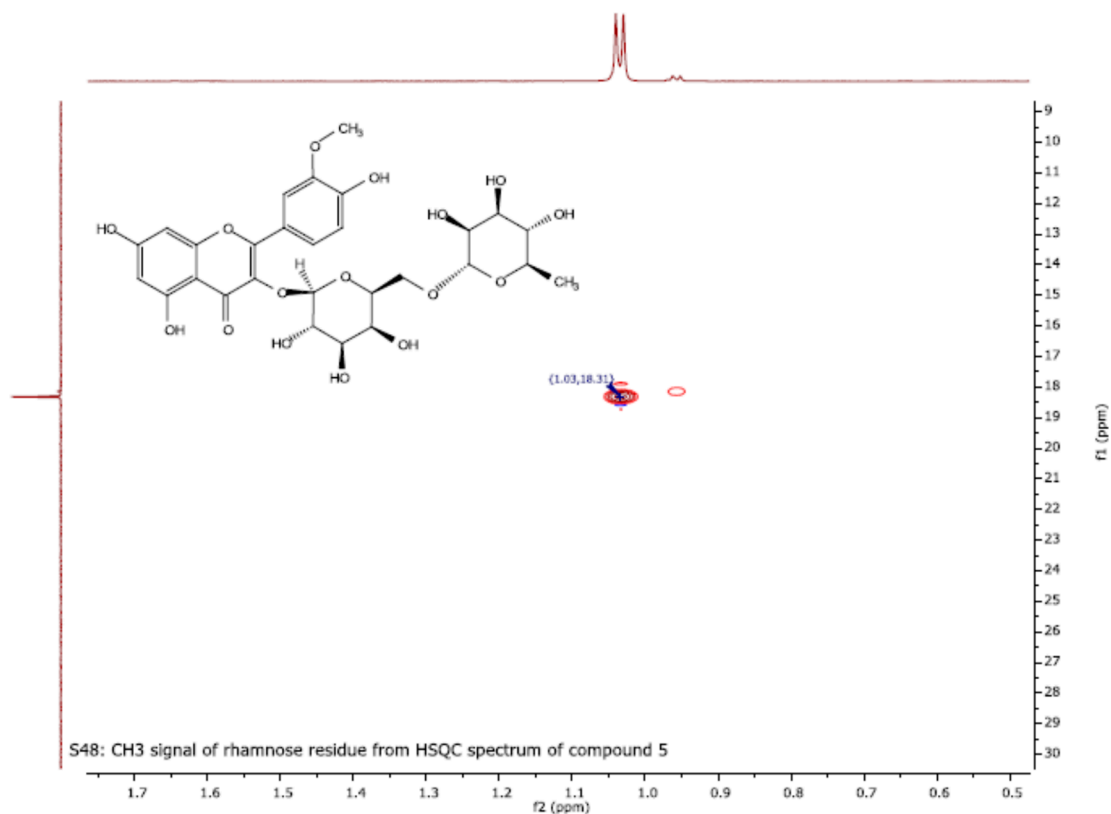

Figure S52: HSQC spectrum of compound 5 (methyl signals of rhamnose moiety)

Histo\_11\_161219 #3437-3499 RT: 7.94-8.0  
T: FTMS - p ESI Full ms (100.00-1500.00)

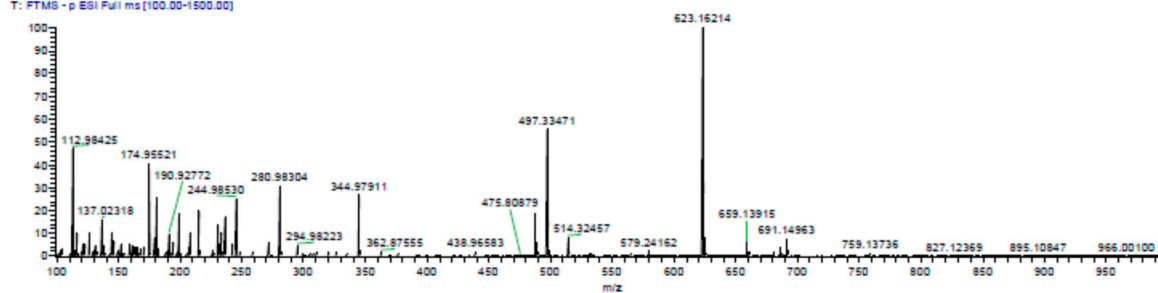

Histo\_11\_161219 #3394-3477 RT: 7.85-8.02 AV: 2 NL: 3.31E5  
T: Average spectrum MS2 623.16 (3394-3477)

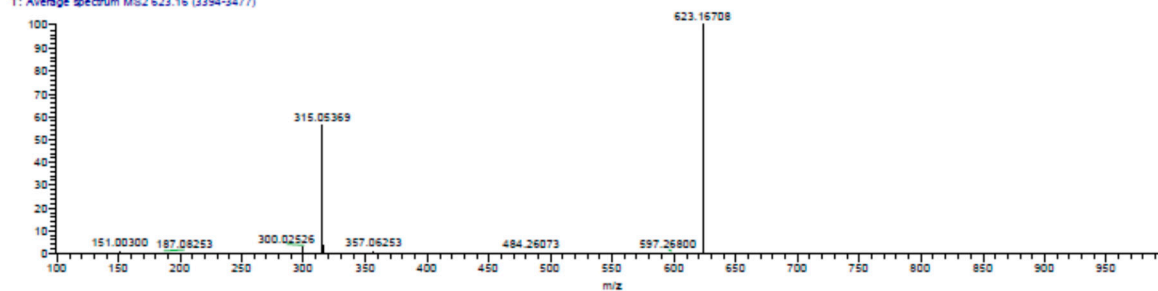

Figure S53: HR-ESI-MS (negative mode) of compound 5

Karel\_10F\_MRM\_Pos\_03 #658 RT: 11.37 AV: 1 NL: 4.47E4  
T: + c ESI Full ms [60.00-1500.00]

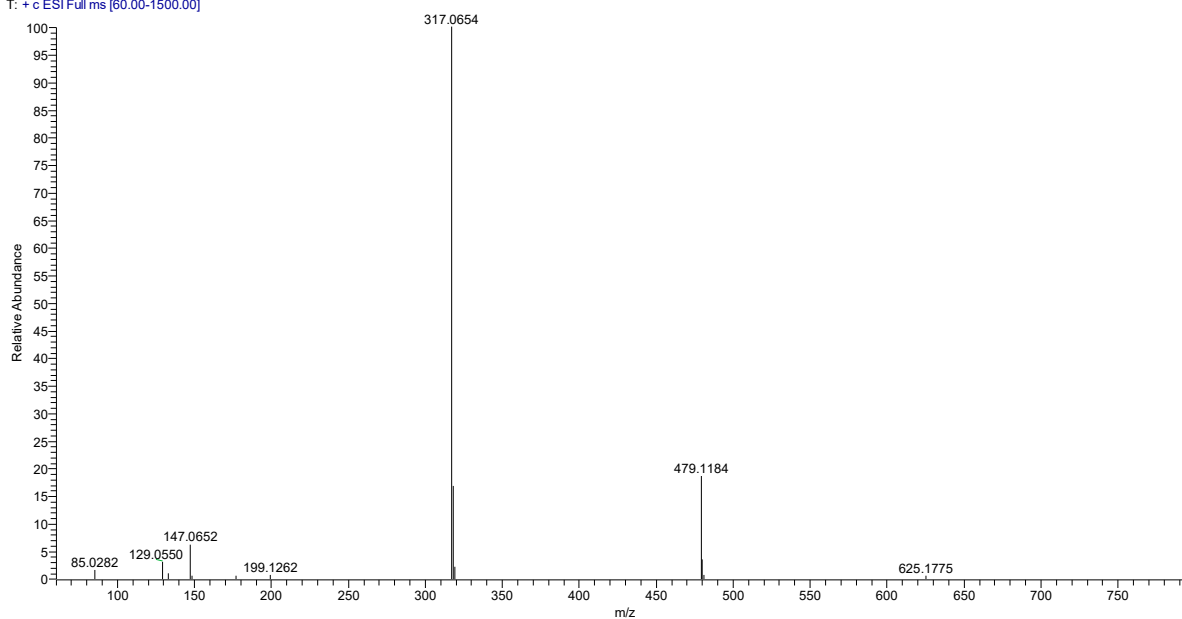

Figure S54: HR-ESI-MS (positive mode) of compound 5

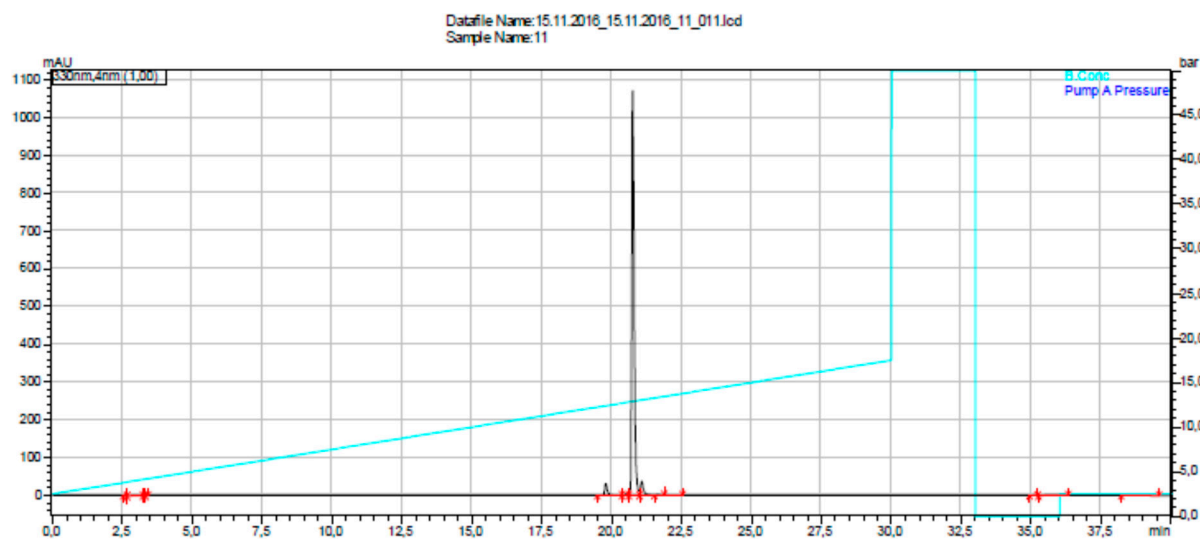

Figure S55: HPLC chromatogram of compound 5

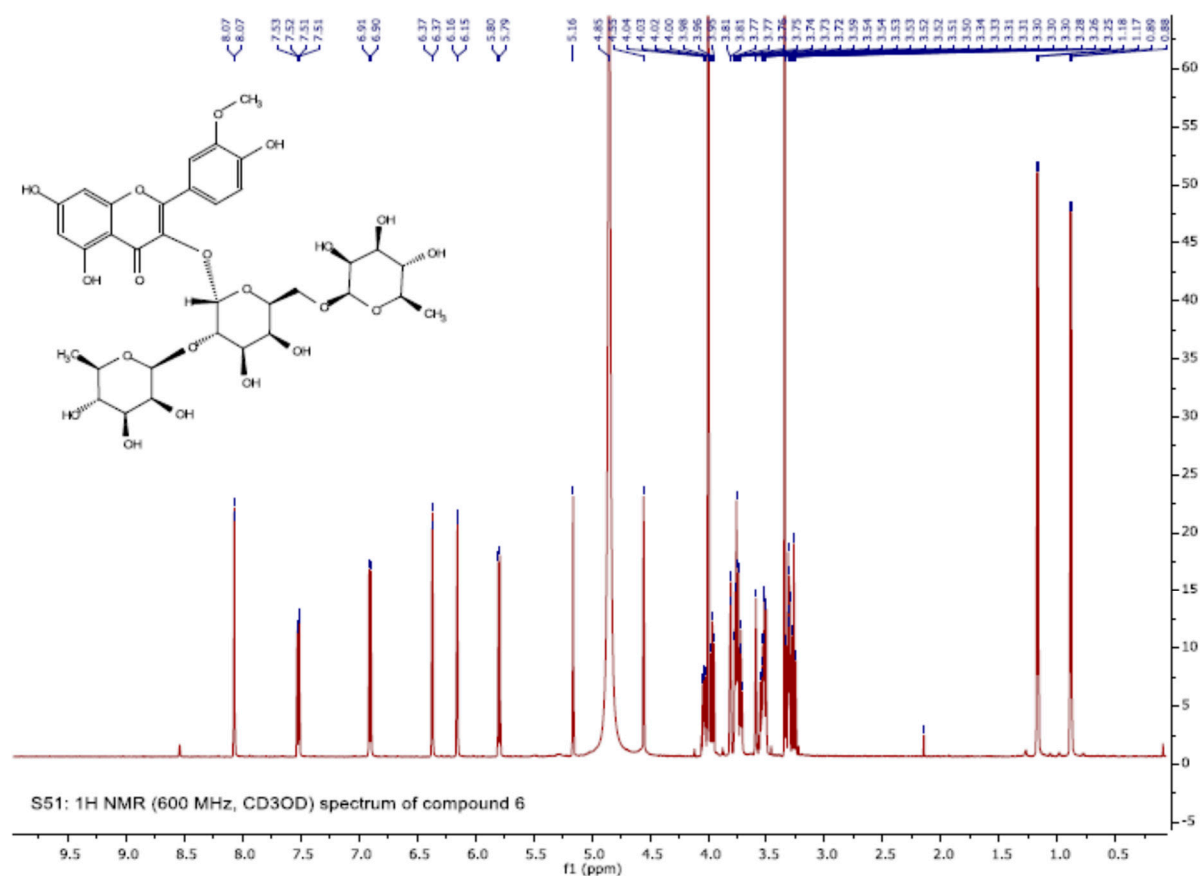

Figure S56:  $^1\text{H}$  NMR (600 MHz,  $\text{CD}_3\text{OD}$ ) spectrum of compound 6

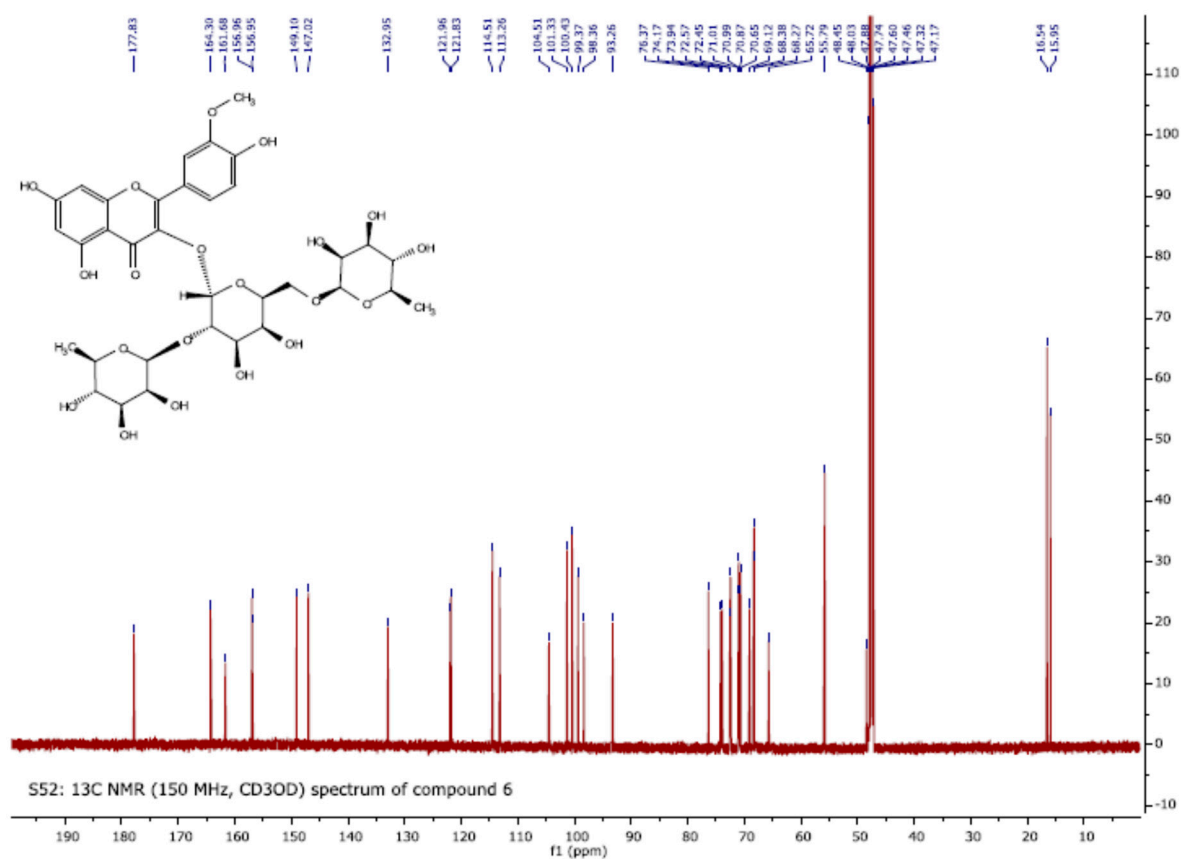

Figure S57:  $^{13}\text{C}$  NMR (150 MHz,  $\text{CD}_3\text{OD}$ ) spectrum of compound 6

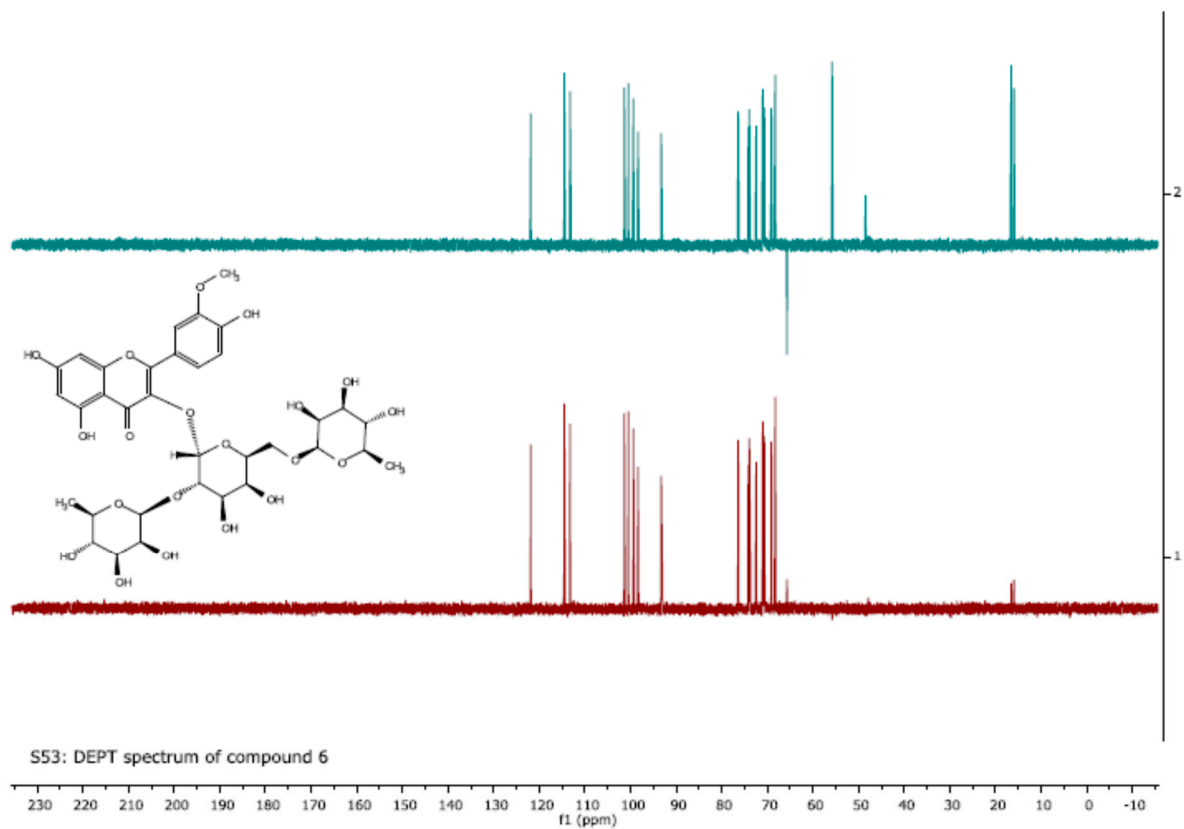

Figure S58: DEPT spectrum of compound 6



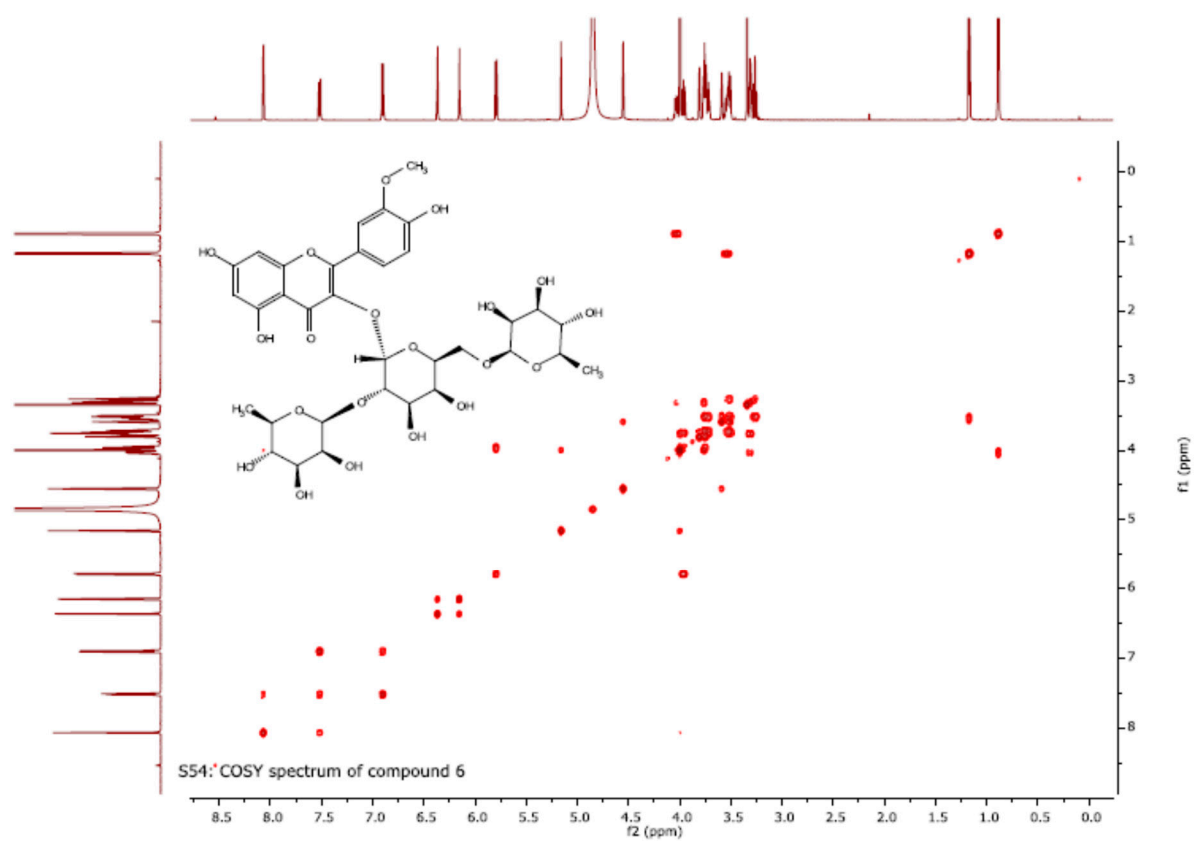

Figure S59: COSY spectrum of compound 6

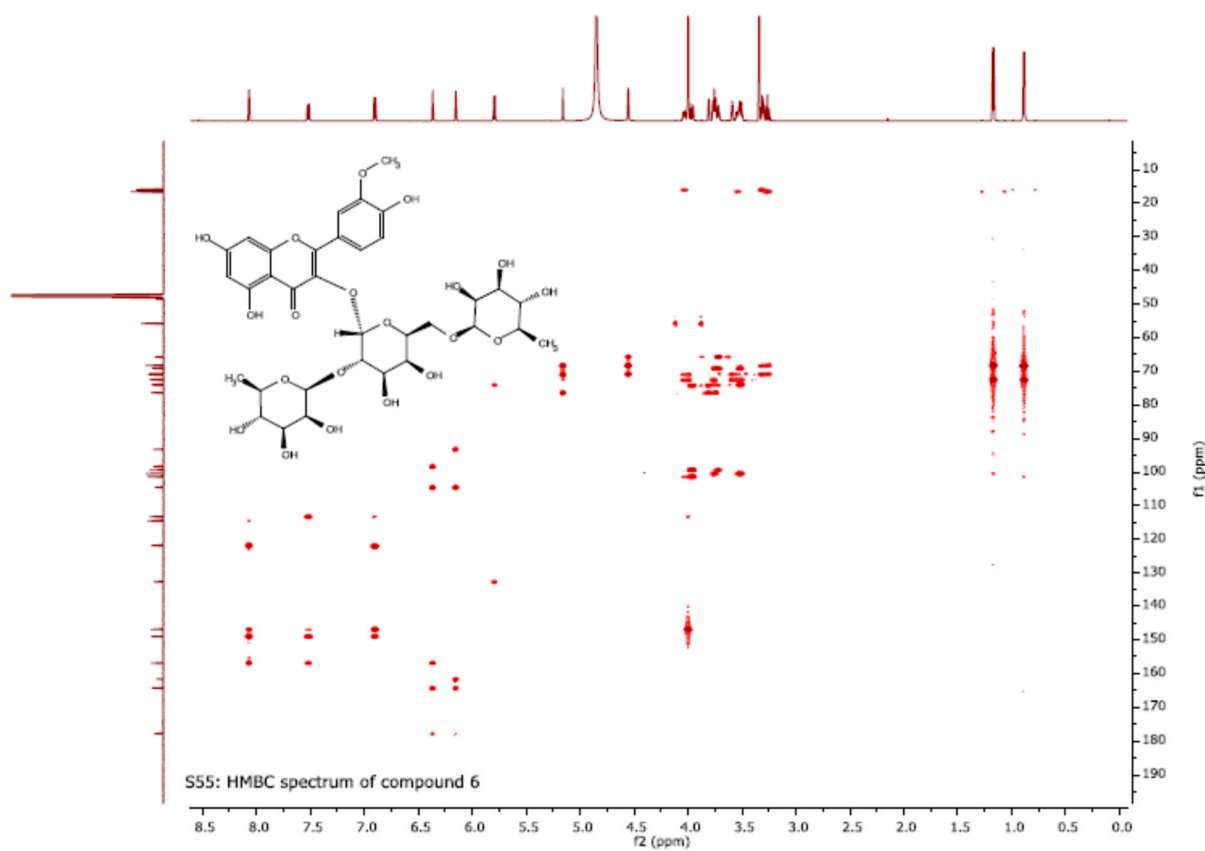

Figure S60: HMBC spectrum of compound 6

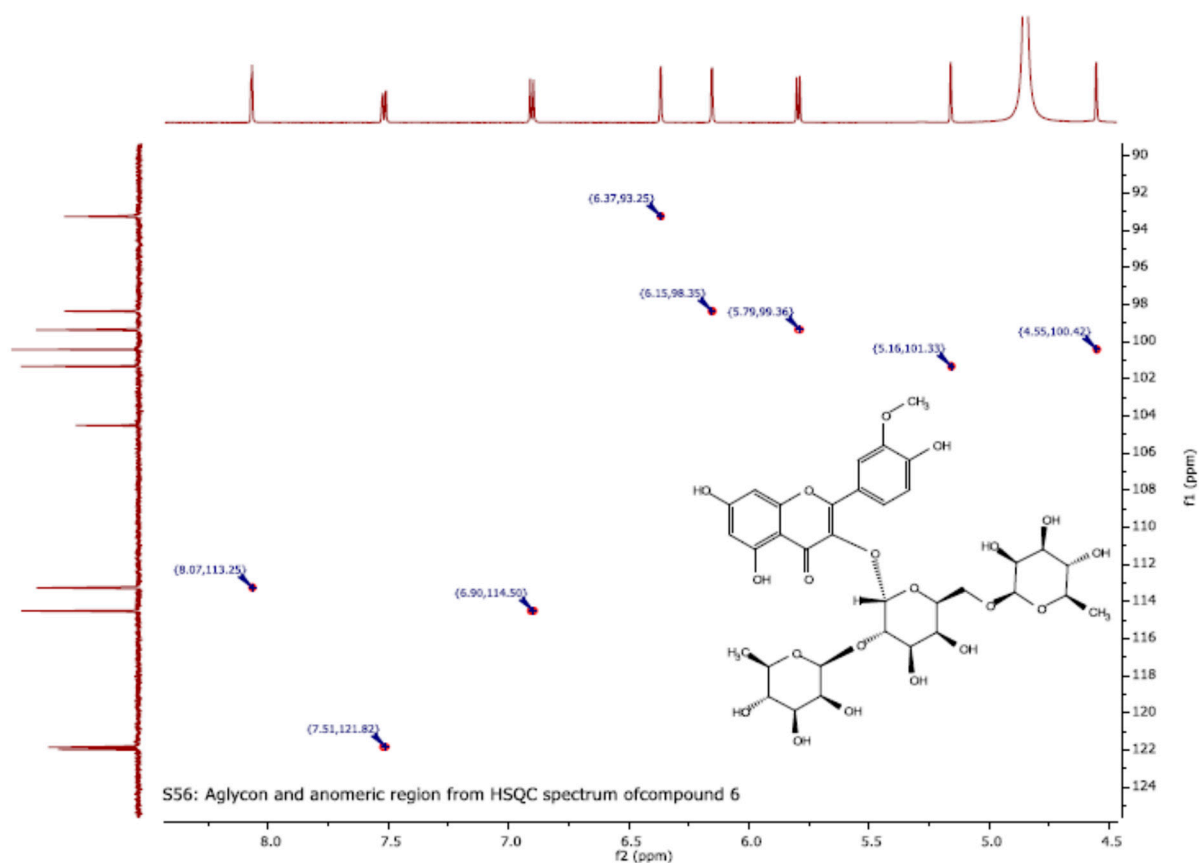

Figure S61: HSQC spectrum of compound 6 (aglycon and anomeric region)

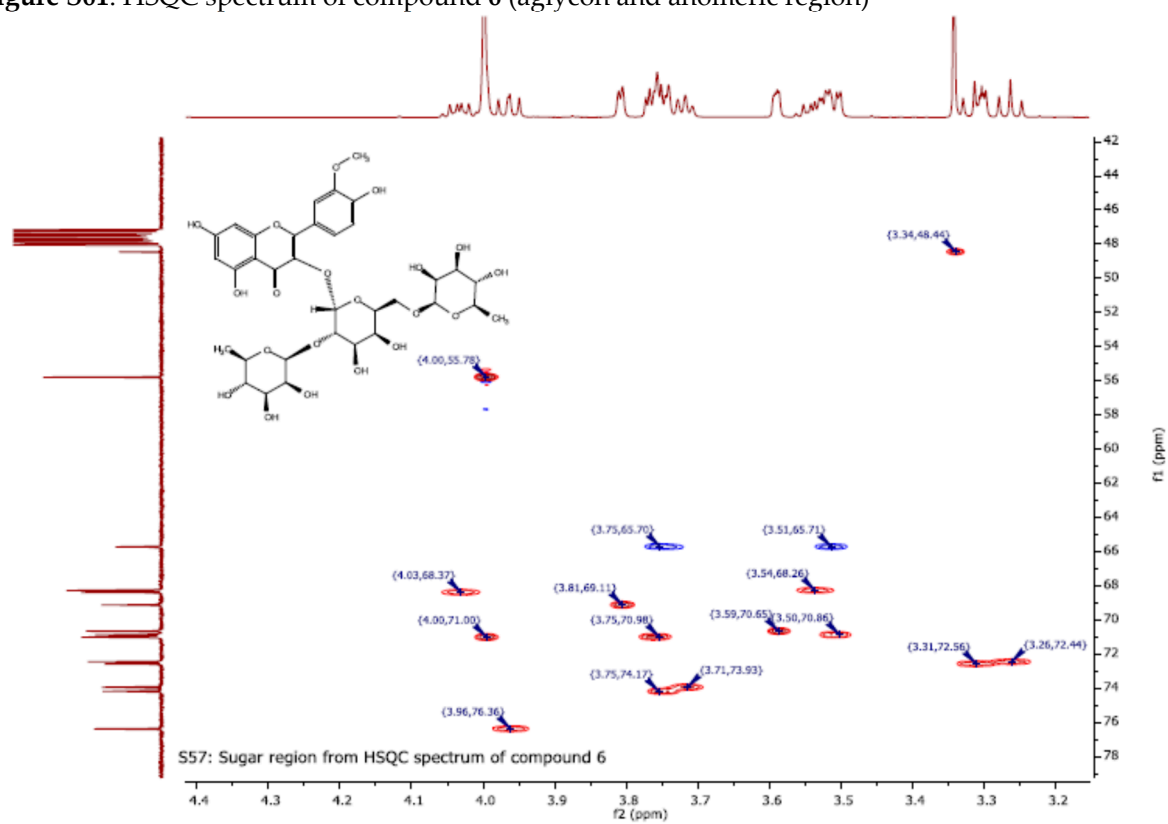

Figure S61: HSQC spectrum of compound 6 (sugar region)

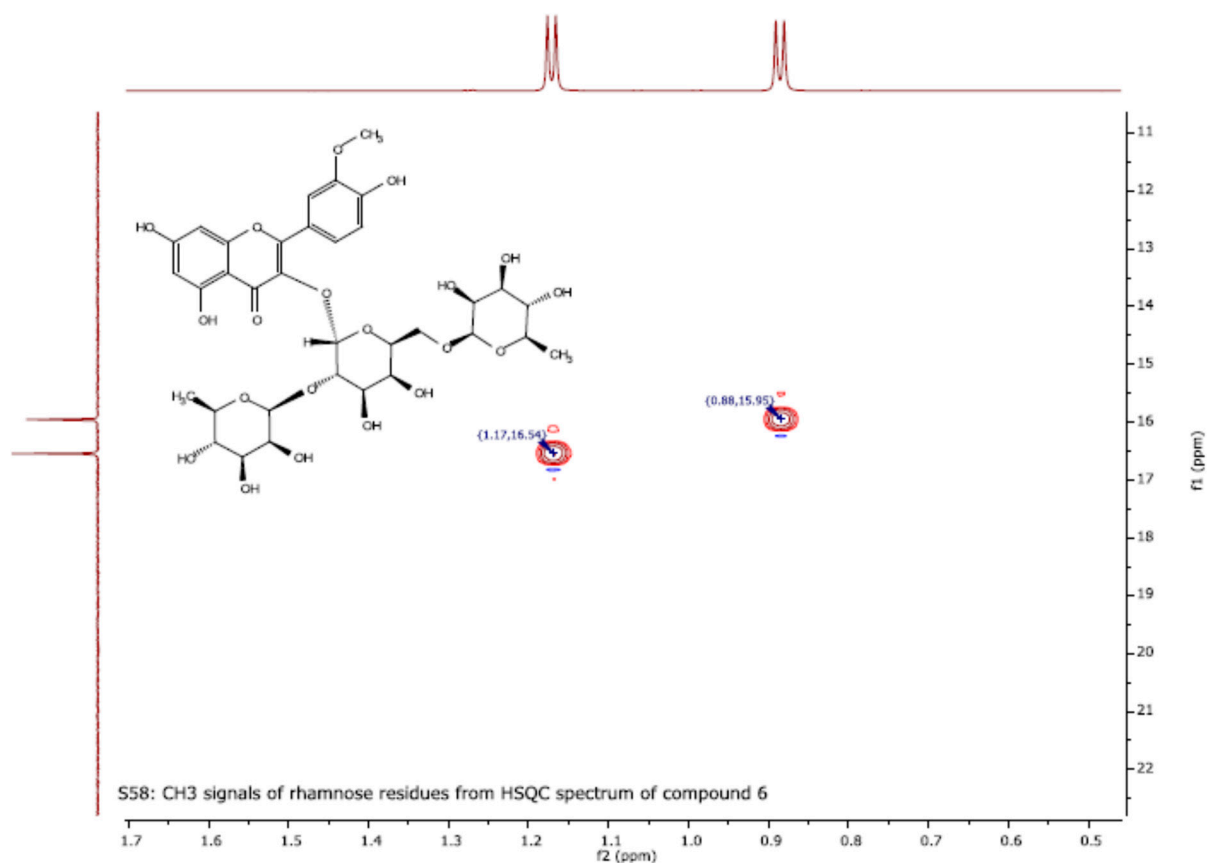

Figure S63: HSQC spectrum of compound 6 (methyl signals of rhamnose moieties)

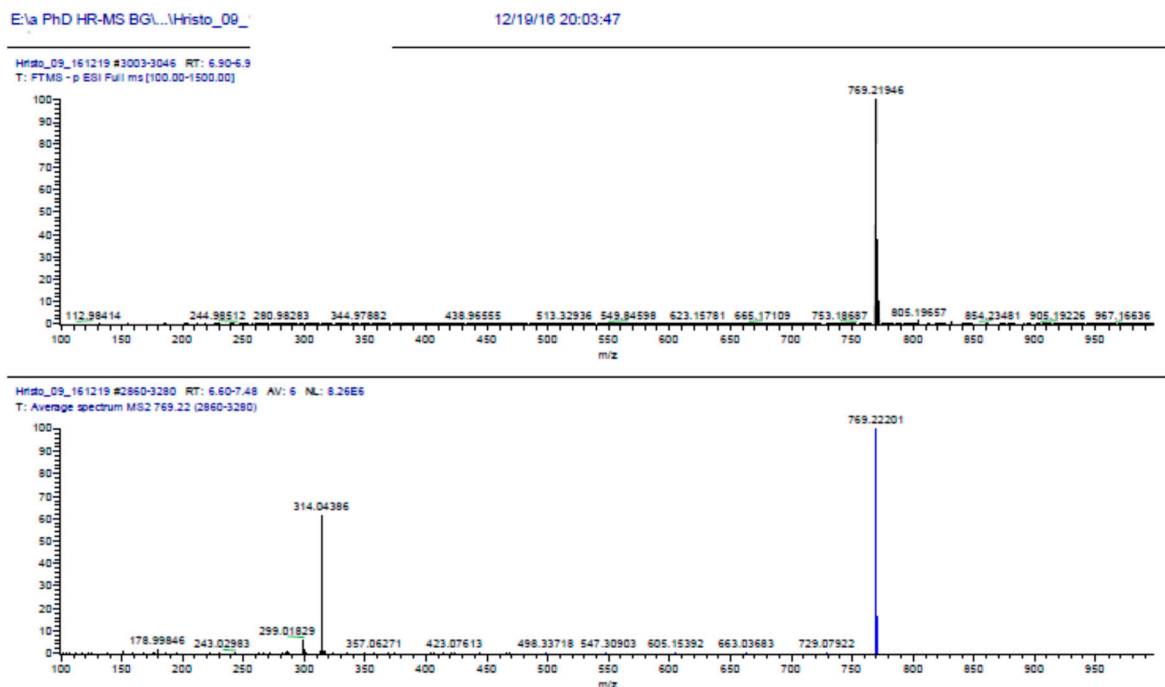

Figure S64: HR-ESI-MS (negative mode) of compound 6



Figure S64: HR-ESI-MS (positive mode) of compound 6

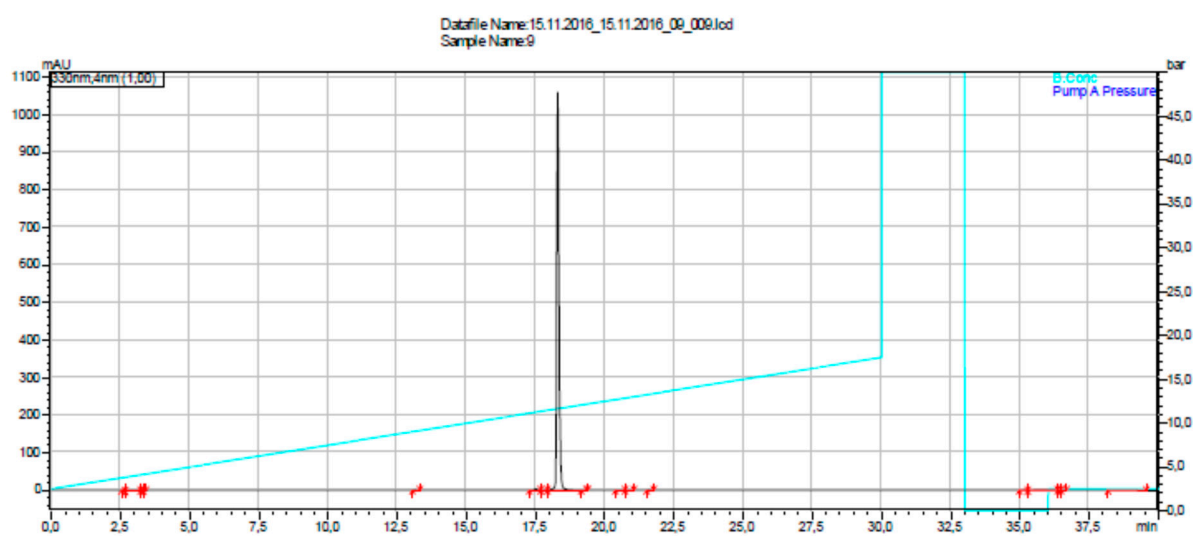

Figure S66: HPLC chromatogram of compound 6

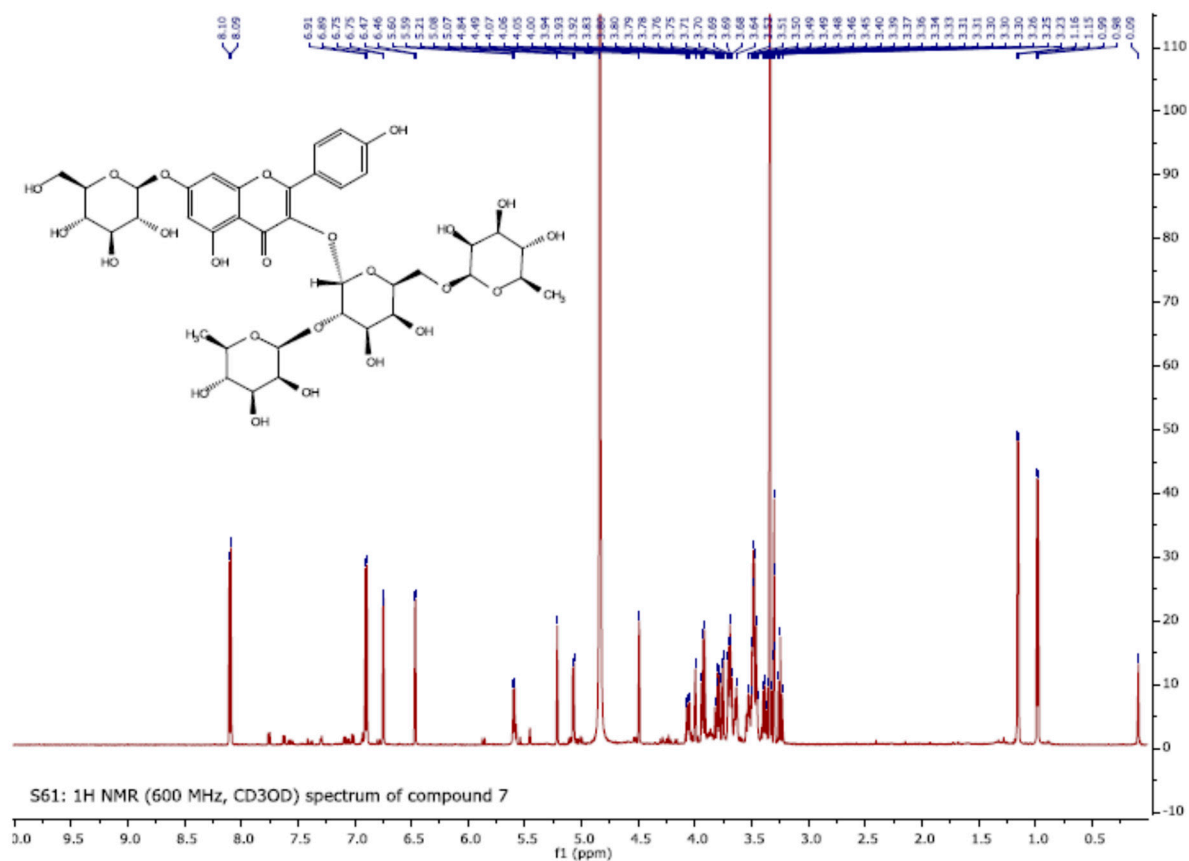

Figure S67:  $^1\text{H}$  NMR (600 MHz,  $\text{CD}_3\text{OD}$ ) spectrum of compound 7

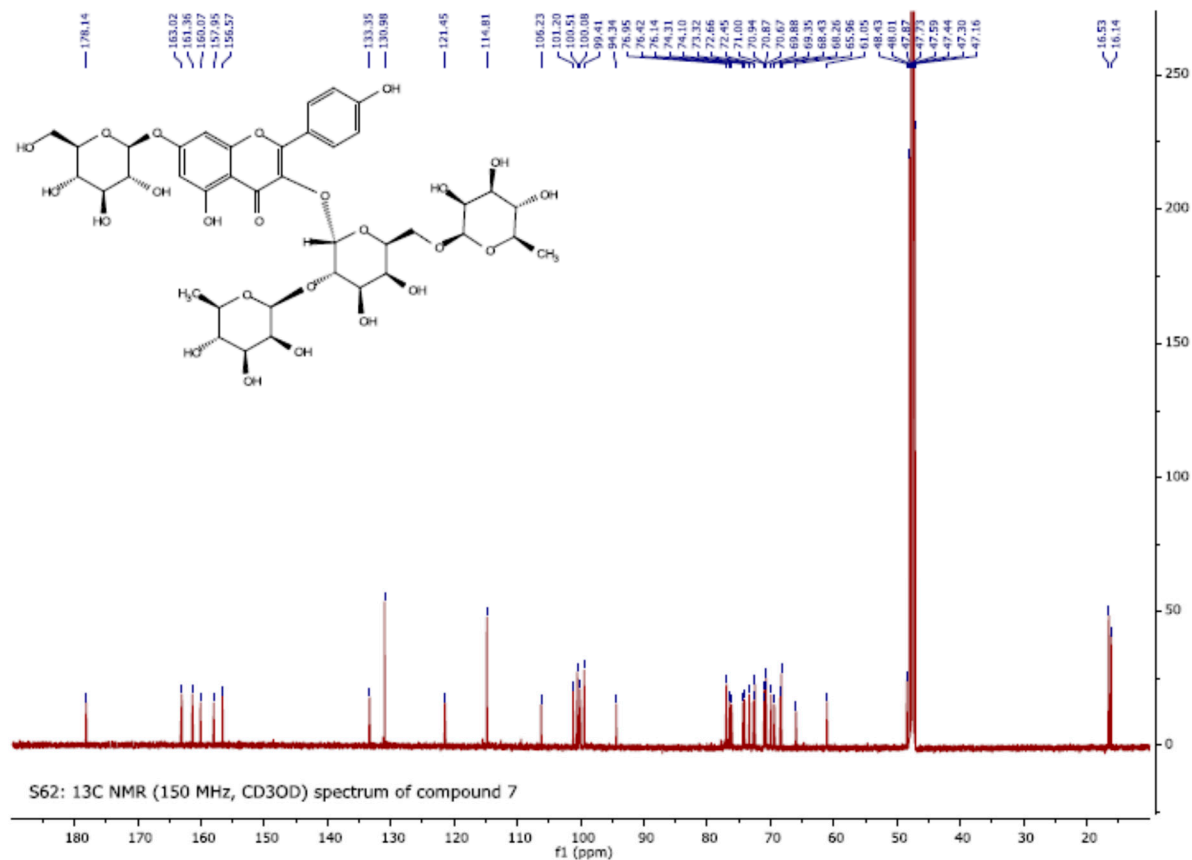

Figure S68:  $^{13}\text{C}$  NMR (600 MHz,  $\text{CD}_3\text{OD}$ ) spectrum of compound 7

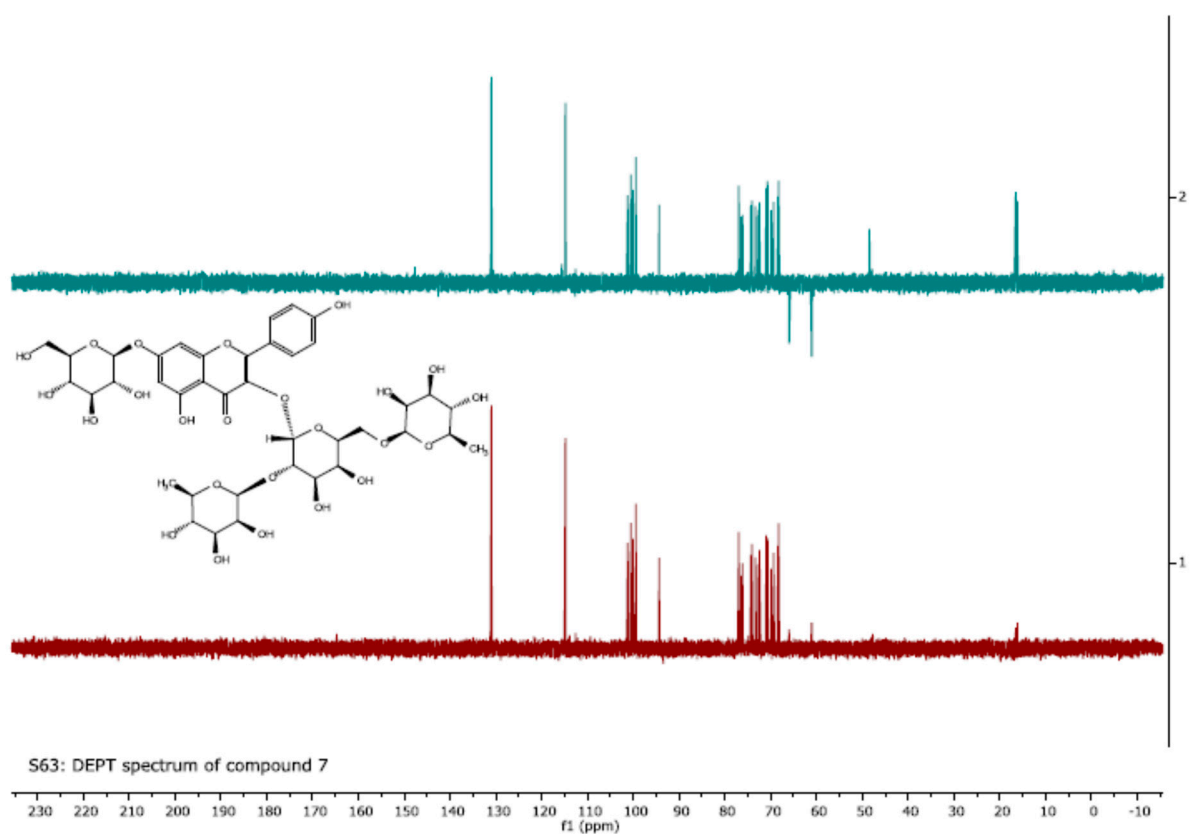

Figure S69: DEPT spectrum of compound 7

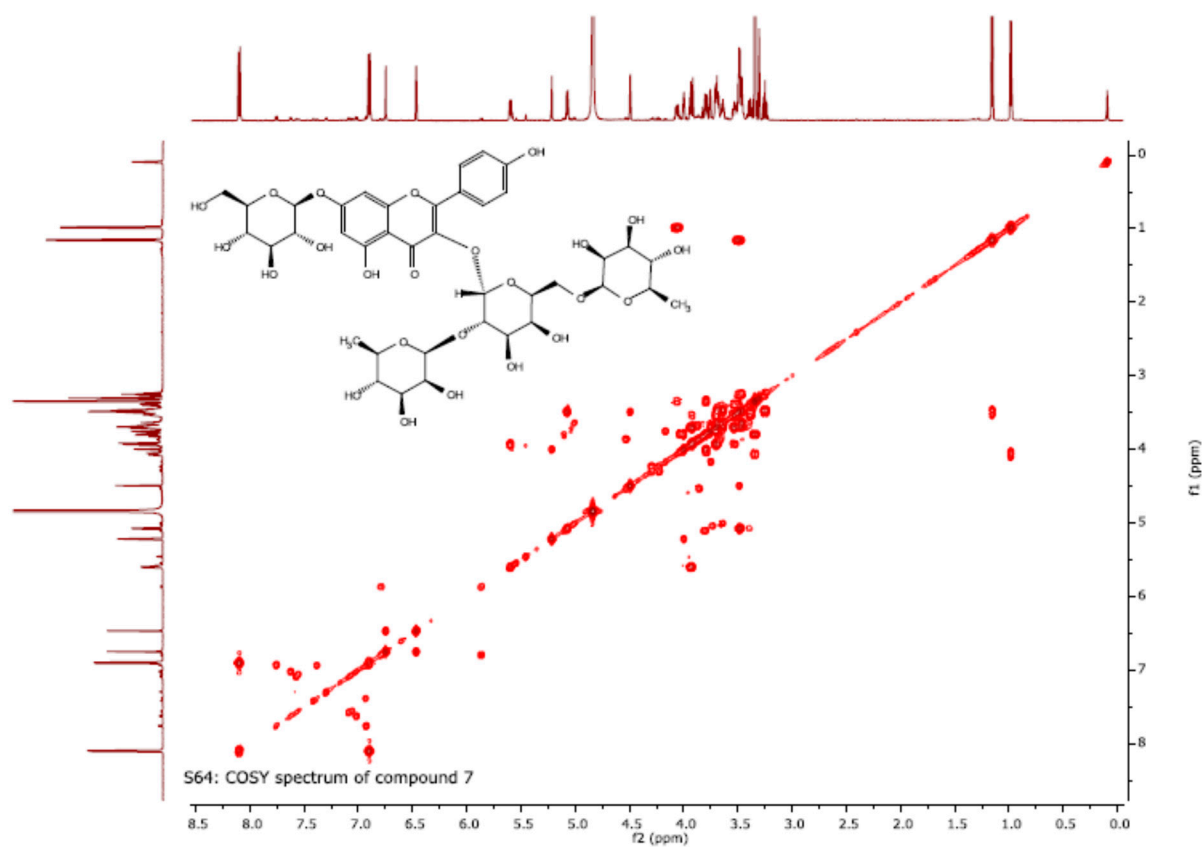

Figure S70: COSY spectrum of compound 7

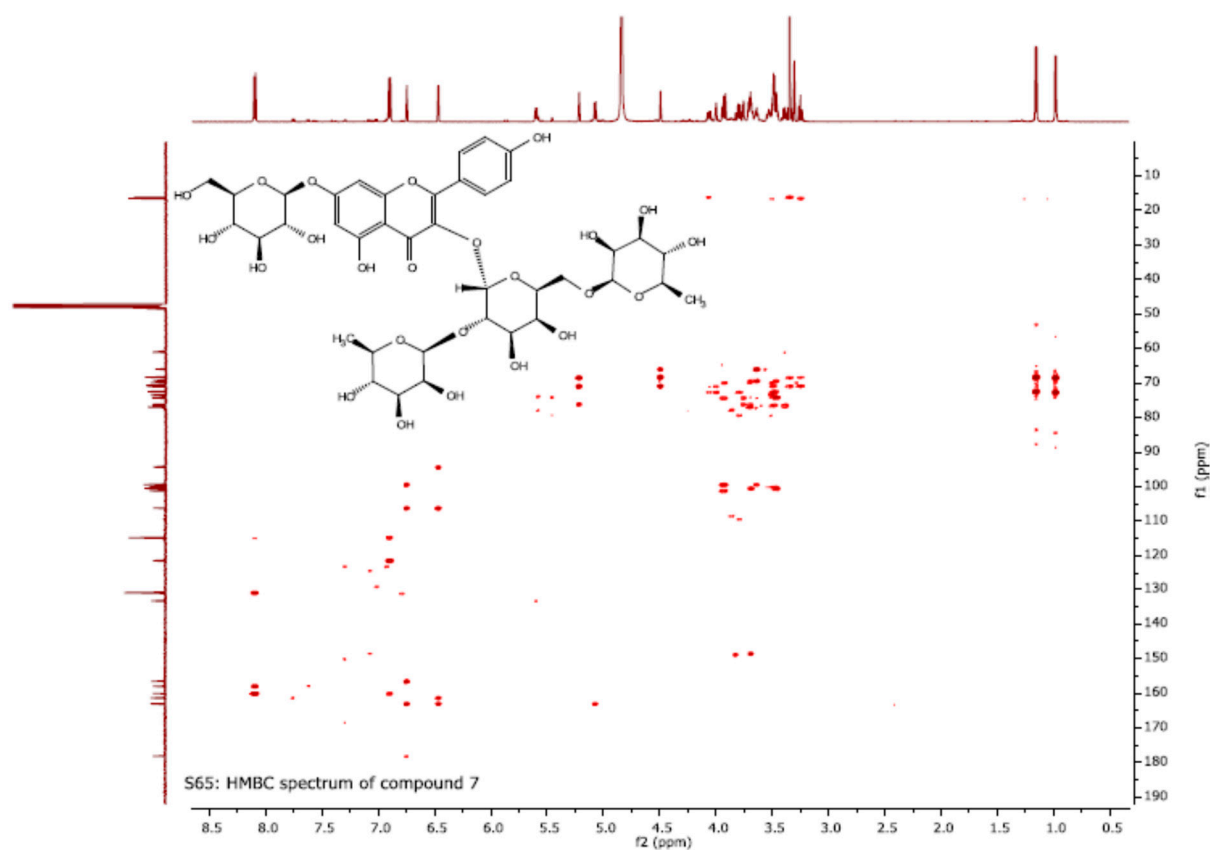

Figure S71: HMBC spectrum of compound 7

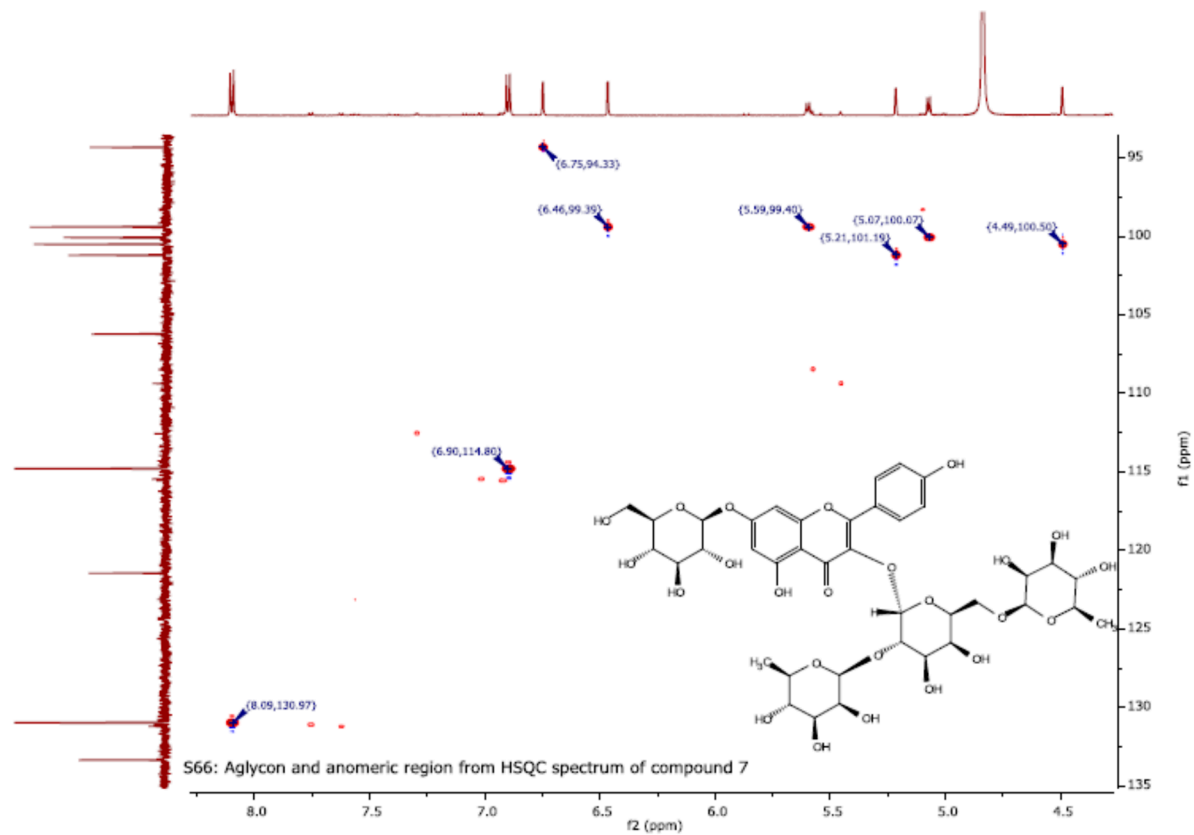

Figure S72: HSQC spectrum of compound 6 (aglycon and anomeric region)

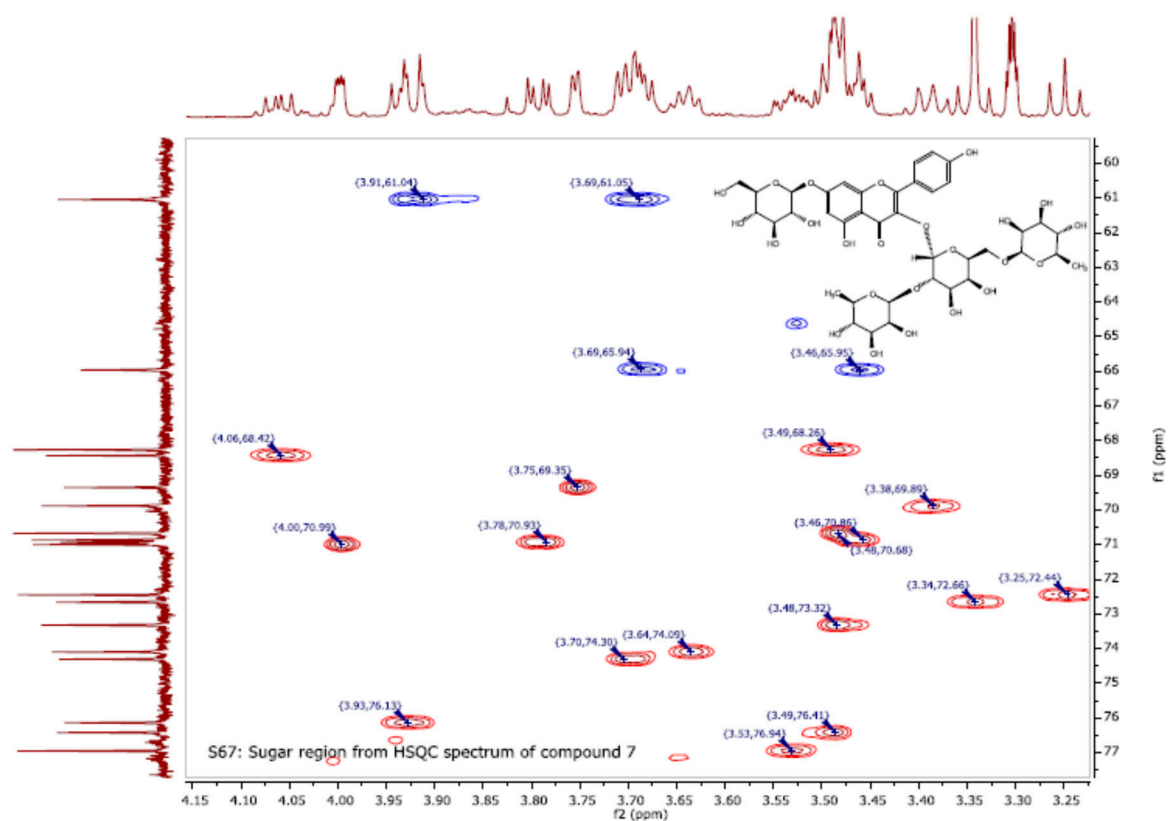

Figure S73: HSQC spectrum of compound 7 (sugar region)

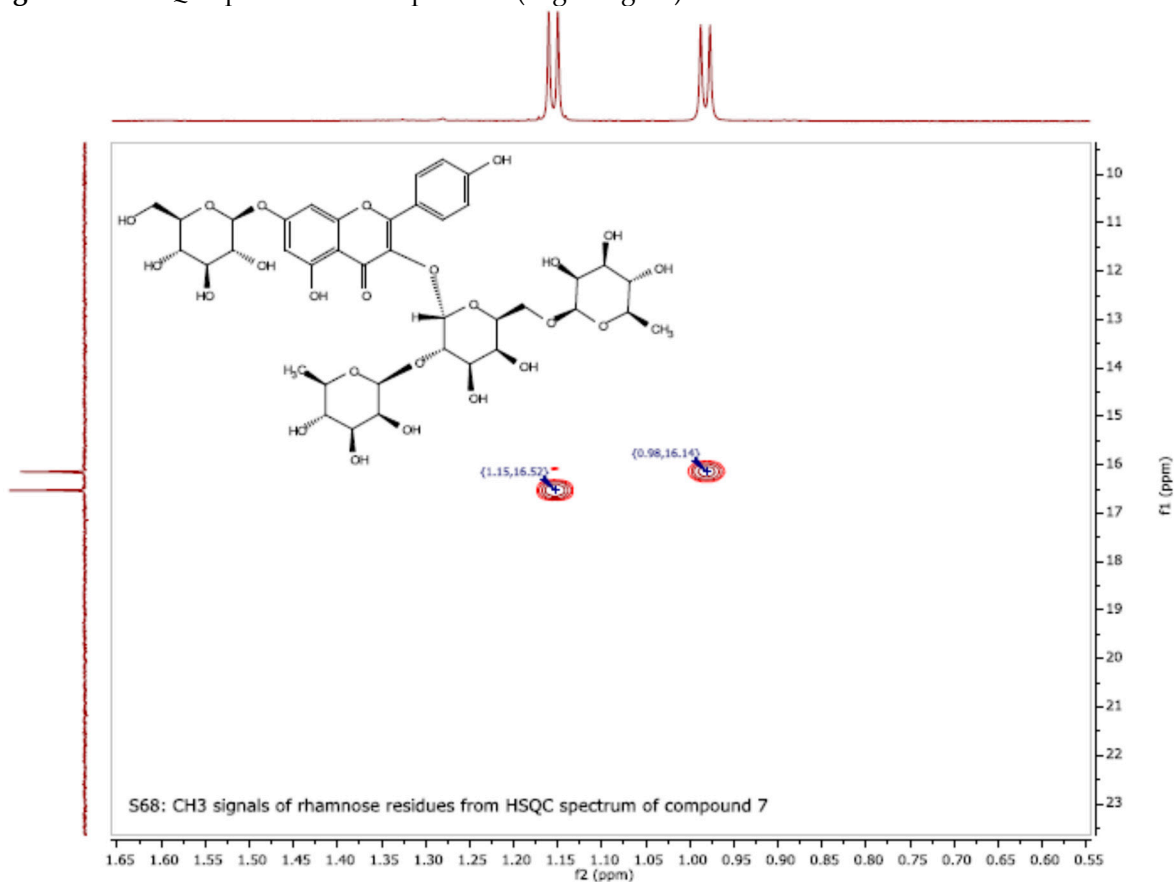

Figure S74: HSQC spectrum of compound 7 (methyl signals of rhamnose moieties)



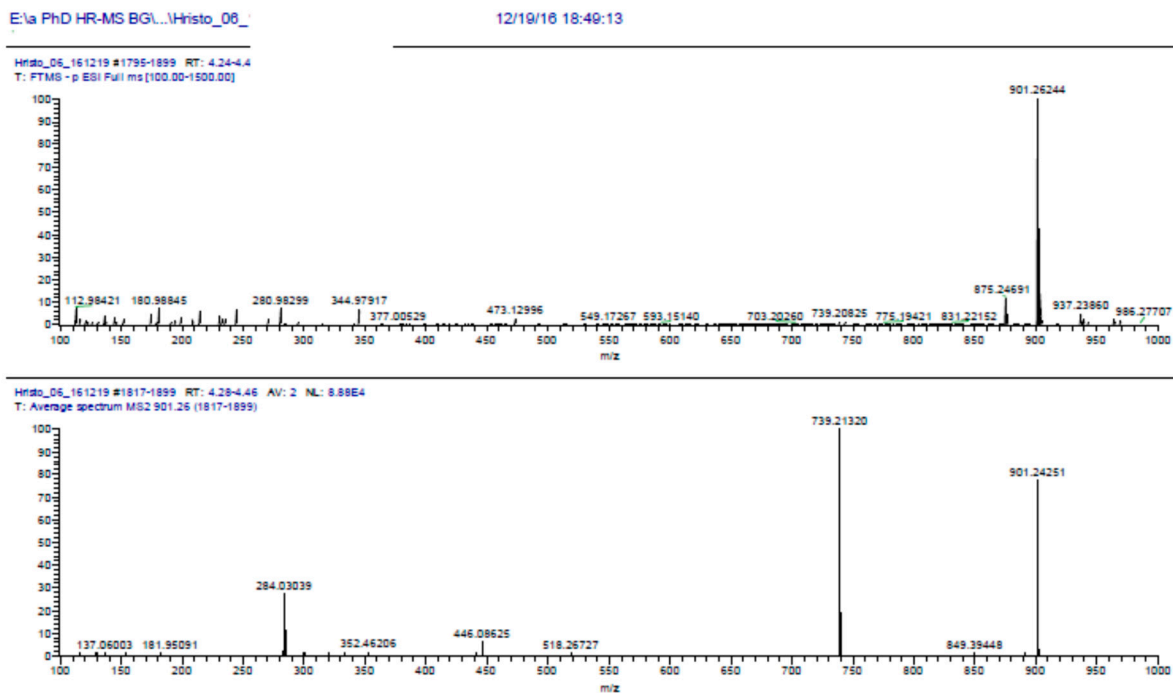

**Figure S75:** HR-ESI-MS (negative mode) of compound **7**

Karel\_2 B22-32\_MRM\_Pos\_01 #499 RT: 8.62 AV: 1 NL: 5.45E4  
T: + c ESI Full ms [60.00-1500.00]

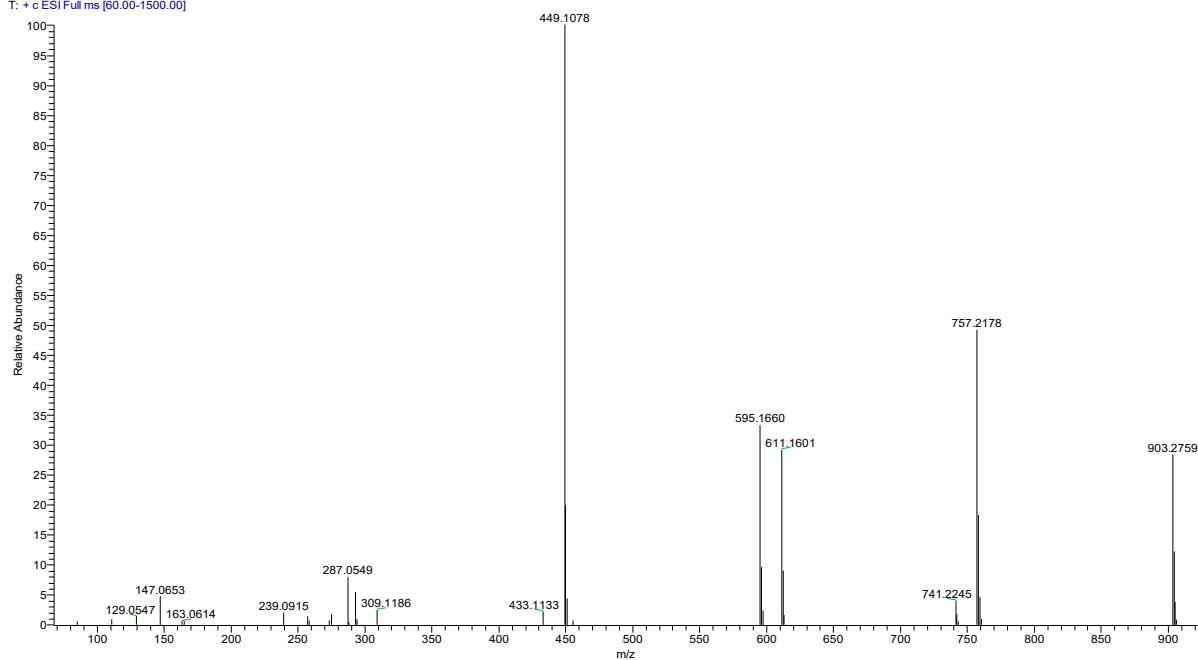

**Figure S76:** HR-ESI-MS (positive mode) of compound **7**

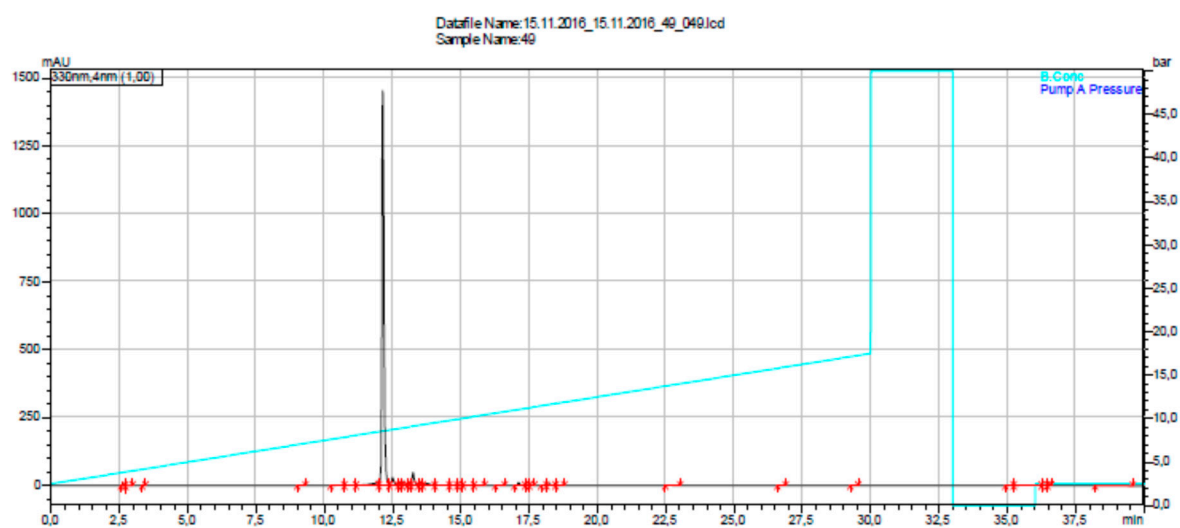

Figure S77: HPLC chromatogram of compound 7
